# Supplementary material for: Genetic Basis of Phenotypic Differences Between Chinese Yunling Black Goats and Nubian Goats Revealed by Allele-Specific Expression in Their F1 Hybrids
Source: PubMed Central journal article supplement (PMC6411798; doi:10.3389/fgene.2019.00145), 2019-03-05
Supplement: Data_Sheet_1.pdf [file Data_Sheet_1.pdf]

```

# -*- coding: utf-8 -*-
#!/usr/bin/env python3

import sys
import os
import argparse
import time
import re

def GetCommandLine():
    CommandLine='python3 {0}'.format(' '.join(sys.argv))
    return(CommandLine)

LogFile=None
def log(LogInfo):
    """
    Output the LogInfo to log file
    """
    global LogFile
    if sys.platform == 'linux':
        CurrentFolder=os.getcwd()
        LogFileName=re.split('/|\\\\',sys.argv[0].strip())
        LogFileName=LogFileName[-1].split('.')
        LogFileName='{0}/{1}.log'.format(CurrentFolder,LogFileName[0])
        if LogFile:LogFile.write(LogInfo+'\n')
        else:
            LogFile=open(LogFileName,'w')
            LogFile.write(LogInfo+'\n')
    else:
        print(LogInfo)
def LoadSnp():
    """
    1      612      T      C
    1      638      A      C
    1      681      G      C
    """
    SnpDict = {}
    ChrDict = {}
    SnpList = []
    for line in args.SnpList:
        if line.startswith('#'): continue
        line = line.strip().split()
        index = '{0}-{1}'.format(line[0],line[1])
        SnpDict[index] = [line[2],line[3]]
        ChrDict[line[0]] = None

```

```

        SnpList.append(index)
    return SnpList,SnpDict,ChrDict
def RelocateReadsPos(pos,pattern,read,quality):
    """
    49M          TTATCCATTGACTTTACCATTCCCAACCCCAAGCTCTTCAACATCAA
    13M5D36M     TTATCCATTGACA  ----  CTTTACCATTCCCAACCCCAAGCTCTTCAACATCAA
    20M2I27M     TAGCTCCTATTAGAGCAAAT  (AA)  AAGAGATGGAAATAGTTTGTTTTTCAG
    3S27M19S     (ATT) AGTAAATAGTACATCATTGGCACTCTT  (TATTGGATTGCAAAATAAA)
    7H49M7H      TTATCCATTGACTTTACCATTCCCAACCCCAAGCTCTTCAACATCAA
    """
    PosList=[]
    PatternNum=re.findall('\d+',pattern)
    PatternStr=re.findall('\D+',pattern)
    for i in range(len(PatternNum)):
        if PatternStr[i]=='S':
            read=read[int(PatternNum[i]):]
            quality=quality[int(PatternNum[i]):]
        elif PatternStr[i]=='M':
            PosList.append([pos,read[0:int(PatternNum[i])],quality[0:int(PatternNum[i])]])
            pos=pos+int(PatternNum[i])
            read=read[int(PatternNum[i]):]
            quality=quality[int(PatternNum[i]):]
        elif PatternStr[i]=='N':
            pos=pos+int(PatternNum[i])
        elif PatternStr[i]=='D':
            pos=pos+int(PatternNum[i])
        elif PatternStr[i]=='I':
            read=read[int(PatternNum[i]):]
            quality=quality[int(PatternNum[i]):]
        elif PatternStr[i]=='H':
            pass
    return PosList
def GetPosState(pos,PosInfo,SnpDict,RefDict,AltDict,OtherDict):
    if PosInfo == SnpDict[pos][0]:
        RefDict[pos]=RefDict.get(pos,0)+1
    elif PosInfo == SnpDict[pos][1]:
        AltDict[pos]=AltDict.get(pos,0)+1
    else:
        OtherDict[pos]=OtherDict.get(pos,0)+1
def GetSnpCountFromBam():
    """
    M_ST-E00522:37:HFH23ALXX:3:2114:1905:28136      16      1      415      0
    36M      *      0      0      AACTACTGTACATTTGCACTCATTTACATGCCAGT
    M_ST-E00522:37:HFH23ALXX:3:1120:4990:39001      0      1      3433      25
    """

```

```

42M      *      0      0      GTGTGGTGTGGTGTGGTGTGTGTGGTGAATATGTGTGGTGT
      M_ST-E00522:37:HFH23ALXX:3:2220:29031:4139      16      1      4407      0
60M      *      *      *      0      0      0
GTGTGTGTAGGGGTGTGTGTGGTGTGATGTGTGTGTAGGGGTG
'''
RefDict = {}
AltDict = {}
OtherDict = {}
SnpList,SnpDict,ChrDict = LoadSnp()
BamFile = os.popen('samtools view {0}'.format(args.bam))
for reads in BamFile:
    reads = reads.strip().split()
    if not reads[2] in ChrDict: continue
    if reads[5] == '*': continue
    if int(reads[4]) < args.rq: continue
    ReadsPos=RelocateReadsPos(int(reads[3]),reads[5],reads[9],reads[10])
    for i in range(len(ReadsPos)):
        for n in range(0,len(ReadsPos[i][1])):
            ChrPos = '{0}-{1}'.format(reads[2],ReadsPos[i][0]+n)
            if not ChrPos in SnpDict: continue
#            print(ord(ReadsPos[i][2][n])-33)
            if ord(ReadsPos[i][2][n])-33 < args.pq: continue
            PosInfo=ReadsPos[i][1][n]
            GetPosState(ChrPos,PosInfo,SnpDict,RefDict,AltDict,OtherDict)
    for SnpPos in SnpList:

args.output.write('{0}\t{1}\t{2}\t{3}\n'.format(SnpPos.replace('-', '\t'),RefDict.get(SnpPos,0),AltDic
t.get(SnpPos,0),OtherDict.get(SnpPos,0)))
def main():
    print('Running...')
    log('The start time: {0}'.format(time.ctime()))
    log('The command line is:\n{0}'.format(GetCommandLine()))
    GetSnpCountFromBam()
    log('The end time: {0}'.format(time.ctime()))
    print('Done!')
#####Argument
parser=argparse.ArgumentParser(description=print(__doc__),formatter_class=argparse.Argumen
tDefaultsHelpFormatter)
parser.add_argument('-s','--SnpList',metavar='File',dest='SnpList',help='Snp List
file',type=open,required=True)
parser.add_argument('-b','--bam',metavar='File',dest='bam',help='Bam
file',type=str,required=True)
parser.add_argument('-q','--MinReadsQuality',dest='rq',help='Min Reads
Quality',type=int,default=30)

```

```
parser.add_argument('-Q','--MinPosQuality',dest='pq',help='Min
Quality[0-93]',type=int,default=30)
parser.add_argument('-o','--Output',metavar='File',dest='output',help='Output
file',type=argparse.FileType('w'),required=True)
args=parser.parse_args()
#####
if __name__=='__main__':
    main()
```

Pos
