# Supplementary material for: Genetic Basis of Phenotypic Differences Between Chinese Yunling Black Goats and Nubian Goats Revealed by Allele-Specific Expression in Their F1 Hybrids
Source: PubMed Central journal article supplement (PMC6411798; doi:10.3389/fgene.2019.00145), 2019-03-05
Supplement: Presentation_1.pdf [file Presentation_1.pdf]

**Supplementary TABLE 1 | Genes with ASE that overlap with known imprinted genes**

| Gene           | Species |       |       |        | Expressed allele |
|----------------|---------|-------|-------|--------|------------------|
|                | Human   | Mouse | Sheep | Cattle |                  |
| <i>IGF2R</i>   | √       | √     | √     | √      | Maternal         |
| <i>GRB10</i>   | √       | √     | √     |        | Maternal         |
| <i>ALDH1L1</i> | √       |       |       |        | Maternal         |
| <i>OBSCN</i>   | √       |       |       |        | Paternal         |

**Supplementary TABLE 2 | Comparison of ASE Gene and Normal Gene Expression**

|         | ASE-average<br>fpkm | ASE-average<br>number | Normal-ave<br>rage fpkm | Normal-avera<br>ge number |
|---------|---------------------|-----------------------|-------------------------|---------------------------|
| Liver   | 576.03              | 144                   | 19.49                   | 15785                     |
| Bone    | 146.15              | 107                   | 19.66                   | 19908                     |
| Muscle  | 645.53              | 78                    | 20.99                   | 19187                     |
| Fat     | 45.22               | 97                    | 20.9                    | 19670                     |
| Mammary | 70.88               | 124                   | 19.88                   | 20304                     |
| Skin    | 162.66              | 127                   | 19.22                   | 20347                     |

**Supplementary TABLE 3 | Genes with ASE that have an overlapping situation in six tissues**

| Tissue number | Tissue                                  | Gene number | Gene                                                  |
|---------------|-----------------------------------------|-------------|-------------------------------------------------------|
| 6             | bone, fat, liver, mammary, muscle, skin | 5           | <i>HLA-A, HLA-B, HLA-DQA1, HLA-DQB1, LOC106503915</i> |
| 5             | bone, fat, liver, muscle, skin          | 1           | <i>SH3TC1</i>                                         |
|               | bone, fat, mammary, muscle, skin        | 5           | <i>SGCB, SPCS3, TUBA1A, PODXL, LOC108633505</i>       |
| 4             | bone, fat, liver, mammary               | 1           | <i>LOC102172184</i>                                   |
|               | bone, fat, liver, skin                  | 1           | <i>HEBP1</i>                                          |
|               | fat, liver, mammary, muscle             | 1           | <i>ENPP5</i>                                          |
|               | fat, liver, mammary, skin               | 1           | <i>LOC102185917</i>                                   |
|               | bone, mammary, muscle, skin             | 1           | <i>RPS8</i>                                           |
|               | bone, fat, mammary, skin                | 1           | <i>LOC102185917</i>                                   |
|               | fat, mammary, muscle, skin              | 2           | <i>TMEM43, AHNAK</i>                                  |
| 3             | bone, fat, liver                        | 2           | <i>C3, TAP1</i>                                       |
|               | bone, liver, mammary                    | 1           | <i>XPC</i>                                            |
|               | liver, mammary, muscle                  | 1           | <i>GHR</i>                                            |
|               | liver, muscle, skin                     | 1           | <i>LOC102173702</i>                                   |
|               | fat, liver, mammary                     | 2           | <i>LOC102172205, LOC102176375</i>                     |

|   |                       |    |                                                                                                                                                                       |
|---|-----------------------|----|-----------------------------------------------------------------------------------------------------------------------------------------------------------------------|
|   | bone, fat, mammary    | 2  | <i>LOC102189675, TNFAIP2</i>                                                                                                                                          |
|   | fat, mammary, muscle  | 1  | <i>LOC102178315</i>                                                                                                                                                   |
|   | mammary, muscle, skin | 1  | <i>LC102169149</i>                                                                                                                                                    |
|   | fat, mammary, skin    | 3  | <i>CLN5, LOC102169730, SEPNI</i>                                                                                                                                      |
| 2 | bone, liver           | 3  | <i>CD5L, LOC102169730, LOC108637533</i>                                                                                                                               |
|   | liver, muscle         | 4  | <i>EGFR, DEPTOR, MRPL17, LOC108637533</i>                                                                                                                             |
|   | fat, liver            | 1  | <i>C4A</i>                                                                                                                                                            |
|   | liver, mammary        | 6  | <i>HSPA13, LOC102169084, LOC102181292, LOC102174841,<br/>LOC102169190, LOC108638035</i>                                                                               |
|   | liver, skin           | 1  | <i>COL18A1</i>                                                                                                                                                        |
|   | bone, muscle          | 1  | <i>GMPR<br/>LOC106501822, RGCC, LOC102174023, LOC108633303,</i>                                                                                                       |
|   | bone, fat             | 5  | <i>LOC108638310</i>                                                                                                                                                   |
|   | bone, mammary         | 4  | <i>STK19, COL6A1, LOC102184629, LOC106503943</i>                                                                                                                      |
|   | bone, skin            | 1  | <i>SLC43A1</i>                                                                                                                                                        |
|   | fat, muscle           | 2  | <i>AMOTL1, FAM127A</i>                                                                                                                                                |
|   | fat, mammary          | 13 | <i>LOC102180881, TGM2, LOC108633235, LOC102175469,<br/>CD36, KIAA1456, AGGF1, DDX58, LOC108634436,<br/>LOC102175225, LOC102176116, LOC102184922,<br/>LOC102172138</i> |

|   |               |     |                                                                                       |
|---|---------------|-----|---------------------------------------------------------------------------------------|
|   | fat, skin     | 4   | <i>LOC102186320, FARP2, SLC40A1, NPC1</i>                                             |
|   | mammary, skin | 8   | <i>CPNE8, TUBB2A, LYRM9, LOC102172005, METTL22, PAPLN, LOC102176726, LOC108636992</i> |
| 1 | liver         | 112 |                                                                                       |
|   | bone          | 73  |                                                                                       |
|   | muscle        | 53  |                                                                                       |
|   | fat           | 44  |                                                                                       |
|   | mammary       | 65  |                                                                                       |
|   | skin          | 91  |                                                                                       |

---

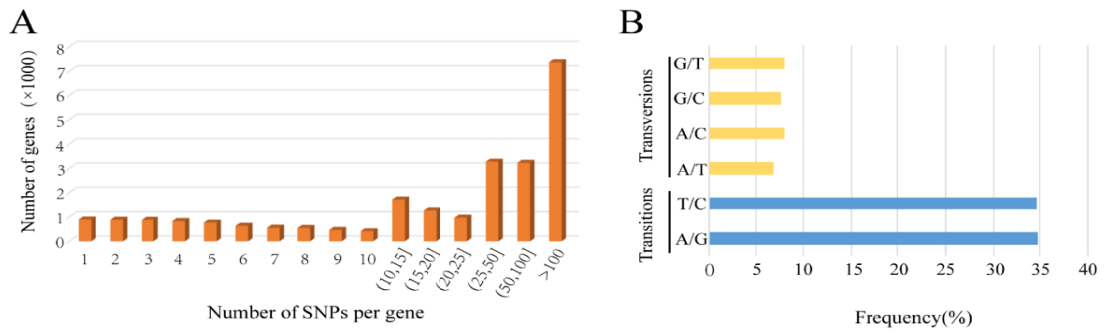

**Supplementary Figure 1. SNP identification among Nubian goats, Chinese Yunling black goats and their hybrid F1 offspring. (A) SNP distribution according to the number of SNPs per gene. (B) Frequency of different substitution types in the identified SNPs.**
