# Supplementary material for: Genetic Basis of Phenotypic Differences Between Chinese Yunling Black Goats and Nubian Goats Revealed by Allele-Specific Expression in Their F1 Hybrids
Source: Front Genet. 2019 Mar 5;10:145. doi: 10.3389/fgene.2019.00145 (PMC6411798; doi:10.3389/fgene.2019.00145)
Supplement: Supplementary file 5 [file Data_Sheet_4.xlsx]

## Sheet: mammary
#Term	Database	ID	Input number	Background number	P-Value	Corrected P-Value	Input
cell part	Gene Ontology	GO:0044464	96	15776	4.33178e-27	7.4531e-24	5175|59084|2524|7450|51267|79026|155038|3257|2011|128553|90338|3482|671|3135|6443|7127|90637|5592|5599|55109|414|55758|57604|5159|23673|158067|10537|84441|310|91828|57190|653145|7035|3304|6782|85329|22852|55303|79602|286133|9318|7052|112802|56999|2299|4267|7018|7915|6281|6283|6202|79188|60559|60313|7846|2213|3884|11145|3119|4680|441631|5420|23001|22885|2690|9617|7280|79658|348932|79091|10008|1203…
cell	Gene Ontology	GO:0005623	96	15802	5.01217e-27	7.4531e-24	5175|59084|2524|7450|51267|79026|155038|3257|2011|128553|90338|3482|671|3135|6443|7127|90637|5592|5599|55109|414|55758|57604|5159|23673|158067|10537|84441|310|91828|57190|653145|7035|3304|6782|85329|22852|55303|79602|286133|9318|7052|112802|56999|2299|4267|7018|7915|6281|6283|6202|79188|60559|60313|7846|2213|3884|11145|3119|4680|441631|5420|23001|22885|2690|9617|7280|79658|348932|79091|10008|1203…
cellular process	Gene Ontology	GO:0009987	90	14647	1.12457e-23	1.11482e-20	5175|59084|2524|7450|51267|79026|155038|3257|2011|128553|90338|3482|671|3135|6443|7127|90637|5592|5599|55109|414|55758|57604|5159|23673|158067|10537|84441|310|91828|57190|653145|7035|3304|85329|91851|79602|286133|9318|7052|112802|56999|2299|7018|7915|6281|6283|89932|6202|79188|60559|60313|7846|2213|11145|3119|4680|441631|5420|23001|22885|2690|9617|7280|79658|10008|1203|54472|6948|727830|7837|1191…
intracellular	Gene Ontology	GO:0005622	86	13775	4.40302e-22	3.27365e-19	5175|2524|7450|51267|79026|155038|3257|2011|128553|90338|3482|671|3135|6443|7127|90637|5592|5599|55109|414|55758|57604|5159|23673|158067|10537|84441|310|91828|57190|653145|7035|3304|6782|85329|22852|55303|9318|7052|112802|56999|2299|4267|7018|7915|6283|6202|79188|60559|60313|7846|3884|11145|3119|5420|23001|22885|2690|9617|7280|79658|79091|10008|1203|54472|6948|7837|1191|3105|3106|26059|55665|1291…
intracellular part	Gene Ontology	GO:0044424	84	13428	3.62844e-21	2.15819e-18	112802|5159|2299|157657|79658|158067|5175|4267|84441|91663|310|10008|23673|1203|54472|23001|57190|653145|7035|7018|3304|6283|7280|7915|7837|2524|6782|7450|1191|3105|155038|10537|22852|3257|55758|26059|6948|6202|79188|55665|1291|2011|128553|90338|79091|2877|26959|60559|948|3482|60313|256987|4257|91828|3135|23586|11145|22941|9318|7127|9617|7846|90637|3884|5592|671|85329|3119|7052|3117|22885|56999|5…
cytoplasm	Gene Ontology	GO:0005737	75	10469	4.94849e-21	2.4528e-18	112802|5159|23673|157657|79658|158067|5175|4267|84441|91663|310|10008|91828|1203|54472|23001|57190|653145|7035|7018|3304|6283|7280|7915|7837|2524|6782|7450|1191|3105|155038|10537|3257|26059|6948|6202|79188|55665|1291|2011|79091|2877|60559|948|3482|56999|256987|4257|671|3135|23586|11145|22941|9318|7127|9617|7846|90637|5592|85329|3119|7052|3117|22885|55109|6443|5420|414|5599|55303|79026|50650|7508|…
single-organism process	Gene Ontology	GO:0044699	81	12728	2.62245e-20	1.11417e-17	112802|5159|2299|441631|79658|158067|5175|56999|84441|348932|310|10008|23673|1203|54472|57190|653145|7035|7018|3304|7280|727830|7915|7837|2524|2213|4680|7450|51267|3105|155038|10537|6281|6283|91851|671|79602|6202|79188|55665|1291|2011|91663|128553|286133|90338|59084|2877|26959|948|3482|256987|4257|91828|3135|23586|11145|22941|9318|7127|9617|7846|93517|3884|5592|85329|3119|7052|3117|22885|55109|64…
binding	Gene Ontology	GO:0005488	82	13918	1.93254e-18	7.18421e-16	112802|5159|2299|7280|79658|158067|5175|56999|310|10008|23673|1203|54472|23001|57190|653145|7018|3304|6283|7915|7837|89932|6782|4680|7450|51267|3105|155038|10537|6281|3257|55758|79026|26059|6948|79602|6202|79188|55665|1291|2011|128553|2213|90338|59084|26959|948|3482|60313|671|4257|91828|3135|23586|11145|22941|9318|7127|9617|7846|90637|3884|5592|85329|3119|7052|3117|22885|55109|25992|5420|414|5599…
organelle	Gene Ontology	GO:0043226	78	12692	4.94592e-18	1.63435e-15	112802|5159|2299|7280|158067|5175|56999|84441|91663|144402|10008|23673|1203|54472|57190|653145|7035|7018|3304|6283|7915|7837|2524|6782|7450|1191|3105|155038|10537|22852|6281|3257|55758|26059|6202|79188|55665|1291|2011|128553|90338|310|2877|26959|60559|948|3482|60313|256987|4257|671|3135|23586|11145|22941|9318|9617|7846|79091|90637|3884|5592|85329|3119|7052|3117|22885|23001|25992|5420|414|5599|885…
cell periphery	Gene Ontology	GO:0071944	49	4962	2.71036e-17	8.06061e-15	5159|441631|79658|5175|4267|348932|310|10008|91828|54472|653145|7035|7018|6283|6443|51267|3105|3106|6281|3257|26059|79602|1291|2011|286133|79091|105372315|948|3482|256987|671|3135|23586|22941|59084|7127|23504|2213|5592|4680|3119|3117|157657|91663|5420|7052|79026|7508|2690
extracellular region	Gene Ontology	GO:0005576	46	4424	6.20772e-17	1.67834e-14	112802|5159|23673|7280|5175|56999|91663|59084|1203|54472|6948|7035|7018|3304|7837|2524|6782|7450|1191|3105|3106|6281|6283|89932|91851|6202|1291|144402|2877|3482|256987|671|7127|7846|3884|948|4680|55109|25992|5420|414|7052|310|79026|7508|2690
extracellular region part	Gene Ontology	GO:0044421	42	3743	1.87481e-16	4.64641e-14	112802|5159|23673|7280|5175|56999|91663|144402|1203|54472|6948|7035|7018|3304|7837|2524|6782|7450|1191|3105|3106|6281|89932|6202|1291|310|2877|3482|256987|671|7127|7846|3884|948|4680|25992|5420|414|7052|79026|7508|2690
single-organism cellular process	Gene Ontology	GO:0044763	72	11494	2.71469e-16	6.21037e-14	112802|5159|23673|441631|79658|158067|5175|56999|84441|91663|310|10008|91828|1203|54472|57190|7018|3304|7280|727830|7915|7837|2524|4680|7450|51267|3105|155038|10537|6281|6283|91851|79602|6202|79188|55665|1291|2011|286133|59084|26959|948|3482|256987|4257|671|3135|23586|11145|22941|9318|7127|9617|7846|2213|5592|85329|3119|7052|3117|22885|55109|6443|5420|414|5599|6948|1191|50650|7508|3106|2690
plasma membrane	Gene Ontology	GO:0005886	47	4859	3.94077e-16	8.37132e-14	5159|441631|79658|5175|4267|348932|310|10008|54472|653145|7035|7018|6283|6443|51267|3105|3106|6281|3257|26059|79602|1291|2011|286133|79091|105372315|948|3482|256987|671|3135|23586|22941|59084|23504|2213|5592|4680|3119|3117|157657|91663|5420|7052|79026|7508|2690
intracellular organelle	Gene Ontology	GO:0043229	72	11680	6.8576e-16	1.35963e-13	112802|5159|2299|7280|158067|5175|56999|84441|310|23673|1203|54472|57190|653145|7035|7018|3304|6283|7915|7837|2524|6782|7450|1191|3105|155038|10537|22852|3257|55758|26059|6202|79188|55665|1291|2011|128553|90338|79091|26959|60559|948|3482|60313|256987|4257|3135|23586|11145|22941|9318|9617|7846|90637|3884|5592|85329|3119|7052|3117|22885|23001|91663|5420|414|5599|8859|6948|79026|7508|3106|6443
cytoplasmic part	Gene Ontology	GO:0044444	59	7901	9.45067e-16	1.75664e-13	5159|56999|23673|79658|158067|5175|9617|84441|310|91828|1203|54472|57190|653145|7035|7018|3304|6283|7915|7837|2524|6782|7450|1191|3105|155038|3257|23001|6948|6202|79188|1291|2011|79091|2877|60559|948|3482|256987|4257|3135|23586|11145|22941|7127|7846|5592|85329|3119|7052|3117|55109|91663|414|5599|55303|79026|50650|3106
membrane-bounded organelle	Gene Ontology	GO:0043227	72	11806	1.27044e-15	2.22252e-13	112802|5159|2299|7280|5175|56999|84441|91663|144402|10008|23673|1203|54472|57190|653145|7035|7018|3304|6283|7915|7837|2524|6782|7450|1191|3105|155038|10537|6281|3257|55758|23001|6202|79188|55665|1291|2011|128553|90338|310|2877|26959|60559|948|3482|60313|256987|4257|671|3135|11145|22941|9318|9617|7846|79091|90637|3884|5592|85329|3119|7052|3117|25992|5420|414|5599|8859|6948|79026|7508|3106
membrane	Gene Ontology	GO:0016020	62	8805	1.49099e-15	2.46345e-13	5159|2213|23673|441631|79658|79026|5175|4267|348932|310|10008|1203|54472|57190|653145|7035|7018|6283|727830|6443|2524|51267|3105|3106|6281|3257|105372315|26059|79602|6202|79188|1291|2011|286133|79091|60559|948|3482|256987|4257|671|3135|23586|11145|22941|59084|23504|93517|5592|4680|3119|7052|3117|157657|91663|5420|1191|23001|64174|28978|7508|2690
vesicle	Gene Ontology	GO:0031982	40	3652	2.98041e-15	4.66513e-13	112802|5159|23673|7280|5175|91663|144402|10008|1203|54472|6948|7018|7837|2524|6782|7450|1191|3105|3106|6281|3257|6202|1291|310|2877|3482|256987|671|3135|7846|3884|948|3119|3117|25992|5420|414|7052|79026|7508
membrane-bounded vesicle	Gene Ontology	GO:0031988	39	3520	5.2781e-15	7.84854e-13	112802|5159|23673|7280|5175|91663|144402|1203|54472|6948|7018|7837|2524|6782|7450|1191|3105|3106|6281|3257|6202|1291|310|2877|3482|256987|671|3135|7846|3884|948|3119|3117|25992|5420|414|7052|79026|7508
extracellular exosome	Gene Ontology	GO:0070062	34	2738	2.15031e-14	3.04526e-12	112802|5159|23673|7280|5175|91663|144402|1203|54472|6948|7018|7837|2524|6782|7450|1191|3105|3106|6281|6202|1291|310|2877|3482|256987|671|7846|3884|25992|5420|414|7052|79026|7508
extracellular vesicle	Gene Ontology	GO:1903561	34	2751	2.46194e-14	3.2166e-12	112802|5159|23673|7280|5175|91663|144402|1203|54472|6948|7018|7837|2524|6782|7450|1191|3105|3106|6281|6202|1291|310|2877|3482|256987|671|7846|3884|25992|5420|414|7052|79026|7508
extracellular organelle	Gene Ontology	GO:0043230	34	2752	2.48762e-14	3.2166e-12	112802|5159|23673|7280|5175|91663|144402|1203|54472|6948|7018|7837|2524|6782|7450|1191|3105|3106|6281|6202|1291|310|2877|3482|256987|671|7846|3884|25992|5420|414|7052|79026|7508
membrane part	Gene Ontology	GO:0044425	51	6452	4.0722e-14	5.04613e-12	5159|2213|23673|79026|5175|4267|348932|59084|10008|1203|54472|57190|7035|7018|727830|6443|2524|51267|3105|3106|6281|3257|105372315|26059|79602|79188|64174|2011|286133|310|60559|948|3482|256987|4257|671|3135|23586|22941|93517|11145|4680|3119|3117|441631|91663|5420|7052|23001|28978|2690
biological regulation	Gene Ontology	GO:0065007	66	11110	3.97344e-13	4.7268e-11	5159|56999|2299|441631|79658|5175|10537|84441|310|10008|23673|1203|54472|57190|653145|7035|7018|3304|7915|7837|89932|2213|4680|7450|51267|3105|155038|6281|6283|55758|91851|79602|1191|2011|128553|286133|90338|23504|26959|948|3482|60313|256987|671|3135|23586|11145|22941|9318|9617|90637|5592|85329|3119|7052|5599|22885|55109|91663|5420|3117|79026|50650|7508|3106|2690
plasma membrane part	Gene Ontology	GO:0044459	31	2516	5.14464e-13	5.88468e-11	5159|5175|4267|348932|10008|54472|7018|51267|3105|3106|6281|3257|26059|79602|2011|286133|948|3482|671|3135|23586|22941|4680|3119|3117|441631|5420|7052|79026|2690|6443
endomembrane system	Gene Ontology	GO:0012505	36	3788	7.67017e-12	8.44855e-10	56999|23673|5175|84441|310|1203|6948|653145|7035|7018|7837|2524|6782|7450|1191|3105|155038|23001|79188|1291|79091|60559|3482|256987|4257|3135|11145|7846|5592|948|3119|3117|414|7052|57190|3106
regulation of cellular process	Gene Ontology	GO:0050794	60	9997	1.07391e-11	1.14065e-09	5159|56999|2299|441631|79658|5175|10537|84441|310|10008|54472|57190|653145|7035|7018|3304|7837|89932|85329|51267|3105|155038|6281|6283|55758|91851|79602|1191|2011|128553|2213|90338|23504|26959|948|3482|60313|671|3135|23586|11145|22941|9318|9617|90637|5592|4680|3119|7052|5599|22885|55109|91663|5420|3117|79026|50650|7508|3106|2690
metabolic process	Gene Ontology	GO:0008152	62	10642	1.24816e-11	1.28001e-09	5159|56999|2299|158067|5175|10537|84441|310|1203|54472|57190|653145|7035|3304|7915|7837|2524|7450|1191|79026|6283|89932|91851|79602|6202|1291|2011|128553|286133|90338|79091|2877|26959|60559|23504|60313|256987|4257|9617|23586|11145|59084|9318|90637|5592|85329|948|5599|22885|55109|91663|93517|414|7052|8859|6948|64174|131965|55758|2690|7508|57604
intracellular membrane-bounded organelle	Gene Ontology	GO:0043231	62	10674	1.43223e-11	1.41982e-09	5159|56999|2299|7280|5175|10537|84441|79091|23673|1203|54472|57190|653145|7035|7018|3304|6283|7915|7837|2524|6782|7450|1191|3105|155038|3257|55758|23001|6202|79188|55665|1291|2011|128553|90338|310|26959|60559|948|3482|60313|256987|4257|3135|11145|9318|9617|7846|90637|5592|85329|3119|7052|3117|5420|414|5599|8859|6948|79026|7508|3106
regulation of biological process	Gene Ontology	GO:0050789	61	10509	2.64923e-11	2.54155e-09	5159|56999|2299|441631|79658|5175|10537|84441|310|10008|54472|57190|653145|7035|7018|3304|7837|89932|2213|85329|51267|3105|155038|6281|6283|55758|91851|79602|1191|2011|128553|286133|90338|23504|26959|948|3482|60313|671|3135|23586|11145|22941|9318|9617|90637|5592|4680|3119|7052|5599|22885|55109|91663|5420|3117|79026|50650|7508|3106|2690
intrinsic component of membrane	Gene Ontology	GO:0031224	42	5355	3.34384e-11	3.01351e-09	5159|2213|23673|5175|4267|348932|59084|10008|1203|54472|7035|727830|6443|2524|51267|3105|3106|3257|105372315|79602|79188|64174|286133|60559|948|3482|256987|4257|671|3135|22941|93517|11145|4680|3119|3117|441631|91663|5420|7052|28978|2690
whole membrane	Gene Ontology	GO:0098805	21	1344	8.63841e-11	7.55607e-09	23673|3482|948|3119|5175|3117|3105|3106|310|10008|6281|4257|5420|3135|23001|653145|1203|7018|79026|1291|91663
single-multicellular organism process	Gene Ontology	GO:0044707	43	5822	1.20849e-10	1.02687e-08	112802|5159|2299|158067|5175|56999|91663|1203|57190|653145|7035|7018|3304|7915|7450|1191|3106|10537|6283|91851|79602|1291|2011|128553|286133|90338|3482|256987|4257|671|3135|23586|22941|9318|7127|3884|5592|948|55109|6443|5420|7052|2690
protein binding	Gene Ontology	GO:0005515	60	10621	1.52956e-10	1.26359e-08	112802|5159|23673|7280|79658|158067|5175|10537|310|10008|91828|1203|54472|57190|653145|7018|3304|6283|7915|7837|6782|7450|1191|3105|3106|6281|3257|55758|26059|79602|79188|1291|2011|128553|79026|26959|3482|4257|3135|23586|11145|22941|9318|7127|7846|2213|3884|5592|948|4680|5599|22885|55109|5420|7052|23001|28978|50650|7508|2690
intrinsic component of plasma membrane	Gene Ontology	GO:0031226	22	1619	3.87717e-10	3.1164e-08	5159|4267|348932|10008|54472|51267|3105|3106|3257|79602|286133|3482|671|22941|4680|948|3117|441631|5420|7052|2690|6443
endoplasmic reticulum	Gene Ontology	GO:0005783	22	1623	4.05753e-10	3.17555e-08	56999|310|1203|57190|7035|7837|6782|7450|7052|3105|155038|79188|1291|60559|4257|3135|11145|3119|3117|414|1191|3106
vacuolar part	Gene Ontology	GO:0044437	15	690	7.49088e-10	5.71228e-08	5159|23673|3119|3117|3105|3106|3482|1203|3135|23001|6948|653145|7018|79026|1291
integral component of membrane	Gene Ontology	GO:0016021	39	5233	1.0676e-09	7.93762e-08	5159|2213|23673|5175|4267|348932|59084|10008|1203|54472|727830|6443|2524|51267|3105|3106|3257|105372315|79602|79188|286133|60559|948|3482|256987|4257|671|3135|22941|93517|11145|4680|3119|3117|441631|91663|5420|28978|2690
multicellular organismal process	Gene Ontology	GO:0032501	45	6781	1.19845e-09	8.69311e-08	112802|5159|2299|158067|5175|56999|91663|1203|57190|653145|7035|7018|3304|6283|727830|7915|7450|1191|3106|10537|3257|91851|79602|1291|2011|128553|286133|90338|3482|256987|4257|671|3135|23586|22941|9318|7127|3884|5592|948|55109|6443|5420|7052|2690
single-organism developmental process	Gene Ontology	GO:0044767	40	5604	2.08564e-09	1.47684e-07	112802|5159|2299|158067|5175|56999|91663|310|1203|54472|57190|727830|7915|85329|1191|3106|10537|6281|91851|79602|1291|2011|128553|90338|3482|256987|4257|3135|22941|9318|7127|3884|5592|948|55109|6443|5420|7052|22885|2690
vacuole	Gene Ontology	GO:0005773	18	1169	2.83613e-09	1.96155e-07	5159|3135|23673|1291|3119|3117|3105|3106|3482|1203|3257|414|23001|6948|653145|7018|79026|7846
response to stimulus	Gene Ontology	GO:0050896	49	8081	3.01278e-09	2.03637e-07	5159|2213|79658|5175|10537|84441|310|54472|57190|653145|7035|7018|3304|6283|7837|4680|7450|51267|3105|3106|3257|91851|79602|1291|2011|286133|1191|2877|26959|948|3482|256987|4257|671|3135|23586|9318|90637|5592|85329|3119|7052|5599|441631|91663|3117|50650|7508|2690
developmental process	Gene Ontology	GO:0032502	40	5693	3.30357e-09	2.18329e-07	112802|5159|2299|158067|5175|56999|91663|310|1203|54472|57190|727830|7915|85329|1191|3106|10537|6281|91851|79602|1291|2011|128553|90338|3482|256987|4257|3135|22941|9318|7127|3884|5592|948|55109|6443|5420|7052|22885|2690
response to stress	Gene Ontology	GO:0006950	31	3660	5.55355e-09	3.59049e-07	5159|5175|10537|310|54472|57190|653145|7035|3304|7837|7450|51267|3105|3106|6283|79602|286133|1191|2877|256987|4257|671|3135|23586|9318|5592|948|3119|3117|5599|7508
vacuolar membrane	Gene Ontology	GO:0005774	13	586	8.72212e-09	5.51906e-07	23673|3119|3117|3105|3106|3482|1203|3135|23001|653145|7018|79026|1291
organelle part	Gene Ontology	GO:0044422	48	8165	1.39917e-08	8.66902e-07	112802|5159|23673|7280|158067|5175|10537|84441|310|1203|54472|57190|653145|7035|7018|3304|7915|2524|7450|1191|3105|155038|22852|23001|6202|79188|1291|2011|26959|60559|3482|4257|3135|22941|9318|7846|3884|948|3119|3117|22885|91663|414|5599|6948|79026|7508|3106
organic substance metabolic process	Gene Ontology	GO:0071704	55	10277	1.57248e-08	9.54402e-07	5159|56999|2299|158067|5175|10537|84441|310|1203|54472|6948|653145|7035|3304|7915|2524|7450|1191|79026|6283|89932|91851|79602|6202|1291|2011|128553|286133|90338|26959|60559|60313|256987|4257|9617|23586|11145|9318|90637|5592|85329|948|5599|22885|55109|91663|93517|414|7052|8859|64174|55758|2690|7508|57604
MHC protein complex	Gene Ontology	GO:0042611	5	25	1.71182e-08	1.01819e-06	3117|3105|3106|3135|3119
peptide antigen binding	Gene Ontology	GO:0042605	5	26	2.03667e-08	1.18766e-06	3117|3105|3106|3135|3119
intracellular organelle part	Gene Ontology	GO:0044446	47	7986	2.15106e-08	1.23024e-06	112802|5159|23673|7280|158067|5175|10537|84441|310|1203|54472|57190|653145|7018|3304|7915|2524|7450|1191|3105|155038|22852|23001|6202|79188|1291|2011|26959|60559|3482|4257|3135|22941|9318|7846|3884|948|3119|3117|22885|91663|414|5599|6948|79026|7508|3106
lumenal side of endoplasmic reticulum membrane	Gene Ontology	GO:0098553	5	29	3.3141e-08	1.79202e-06	3117|3105|3106|3135|3119
integral component of lumenal side of endoplasmic reticulum membrane	Gene Ontology	GO:0071556	5	29	3.3141e-08	1.79202e-06	3117|3105|3106|3135|3119
integral component of plasma membrane	Gene Ontology	GO:0005887	19	1562	4.10241e-08	2.17867e-06	286133|441631|948|4680|4267|3117|3105|3106|3482|10008|671|3257|51267|5420|22941|348932|54472|6443|2690
endocytic vesicle	Gene Ontology	GO:0030139	9	254	4.21266e-08	2.19798e-06	23673|948|3119|3117|3105|3106|3482|3135|7018
anatomical structure development	Gene Ontology	GO:0048856	36	5313	7.4246e-08	3.80703e-06	112802|5159|2299|158067|5175|56999|310|1203|54472|57190|7915|1191|3106|10537|6281|91851|79602|1291|2011|128553|90338|3482|256987|4257|3135|22941|9318|7127|5592|948|55109|91663|5420|7052|22885|6443
positive regulation of biological process	Gene Ontology	GO:0048518	35	5067	7.60808e-08	3.83499e-06	5159|56999|2299|5175|10537|84441|10008|54472|57190|7018|3304|1191|3105|6281|6283|79602|2011|26959|3482|60313|3135|23586|22941|90637|948|3119|7052|5599|55109|91663|5420|3117|50650|22885|2690
localization	Gene Ontology	GO:0051179	37	5581	7.90228e-08	3.91689e-06	5159|56999|23673|5175|348932|10008|91828|54472|6948|653145|7018|3304|7450|1191|79026|6281|6283|79602|6202|2011|286133|26959|3482|256987|23586|7127|7846|5592|948|4680|5599|91663|5420|7052|57190|22885|2690
cellular response to stimulus	Gene Ontology	GO:0051716	41	6741	1.22926e-07	5.80291e-06	5159|2213|79658|5175|10537|84441|54472|57190|7018|3304|7837|85329|51267|3105|3106|6283|91851|79602|1291|2011|286133|1191|26959|948|3482|4257|3135|23586|9318|90637|5592|4680|3119|7052|5599|441631|91663|3117|50650|7508|2690
transport	Gene Ontology	GO:0006810	32	4456	1.42398e-07	6.43064e-06	5159|56999|23673|5175|348932|10008|91828|57190|653145|7018|3304|7450|1191|79026|6281|6283|79602|6202|286133|26959|3482|256987|23586|7127|7846|948|5599|91663|7052|6948|22885|2690
bounding membrane of organelle	Gene Ontology	GO:0098588	19	1694	1.42711e-07	6.43064e-06	2524|23673|3482|948|5175|1203|3117|3105|3106|310|4257|3135|23001|653145|22941|7018|79026|3119|1291
establishment of localization	Gene Ontology	GO:0051234	32	4583	2.69644e-07	1.1456e-05	5159|56999|23673|5175|348932|10008|91828|57190|653145|7018|3304|7450|1191|79026|6281|6283|79602|6202|286133|26959|3482|256987|23586|7127|7846|948|5599|91663|7052|6948|22885|2690
cellular component organization	Gene Ontology	GO:0016043	37	5863	2.79459e-07	1.17058e-05	112802|5159|23673|79658|5175|10537|310|1203|57190|653145|7018|3304|7915|7837|7450|1191|79026|6281|3257|79602|6202|79188|1291|2011|286133|4257|9617|22941|9318|5592|948|5599|22885|91663|5420|7508|6443
innate immune response	Gene Ontology	GO:0045087	13	798	2.90349e-07	1.1993e-05	1191|948|3119|10537|3117|3105|3106|256987|54472|3135|23586|3304|6283
Golgi apparatus	Gene Ontology	GO:0005794	17	1431	3.20745e-07	1.3067e-05	2524|3482|5592|948|3119|84441|3105|155038|79091|256987|1203|3135|3117|23673|79188|3106|1191
immune response	Gene Ontology	GO:0006955	17	1474	4.81497e-07	1.9351e-05	2213|1191|948|3119|23586|3117|3105|3106|10537|256987|54472|3135|5599|3304|6283|671|7837
cell communication	Gene Ontology	GO:0007154	37	6000	4.99633e-07	1.98121e-05	5159|79658|5175|10537|84441|59084|54472|57190|3304|7837|85329|51267|3105|3106|6283|91851|79602|2011|1191|26959|948|3482|3135|23586|22941|9318|2213|5592|4680|3119|7052|5599|441631|91663|3117|50650|2690
cellular component organization or biogenesis	Gene Ontology	GO:0071840	37	6012	5.25209e-07	2.05523e-05	112802|5159|23673|79658|5175|10537|310|1203|57190|653145|7018|3304|7915|7837|7450|1191|79026|6281|3257|79602|6202|79188|1291|2011|286133|4257|9617|22941|9318|5592|948|5599|22885|91663|5420|7508|6443
cell junction	Gene Ontology	GO:0030054	15	1150	5.41991e-07	2.09335e-05	5159|23504|5175|4267|7052|79026|3482|91663|5420|23586|26059|22941|6202|3304|157657
cytoplasmic, membrane-bounded vesicle	Gene Ontology	GO:0016023	15	1159	5.96794e-07	2.24666e-05	5159|23673|3482|948|5175|7450|3117|3105|3106|310|3257|3135|1191|7018|3119
extracellular space	Gene Ontology	GO:0005615	16	1330	6.29432e-07	2.33991e-05	56999|4680|5175|3884|1191|948|3482|671|5420|6948|7035|7018|7127|3304|7837|2690
primary metabolic process	Gene Ontology	GO:0044238	50	9824	6.68763e-07	2.40652e-05	5159|56999|2299|158067|5175|10537|84441|1203|54472|653145|7035|3304|7915|2524|7450|1191|79026|6283|89932|91851|79602|6202|64174|2011|128553|93517|90338|26959|60559|60313|256987|9617|23586|11145|9318|90637|5592|85329|948|5599|22885|55109|91663|414|7052|8859|55758|2690|7508|57604
ER to Golgi transport vesicle membrane	Gene Ontology	GO:0012507	5	56	6.6894e-07	2.40652e-05	3117|3105|3106|3135|3119
signal transduction	Gene Ontology	GO:0007165	35	5542	6.71626e-07	2.40652e-05	5159|79658|5175|10537|84441|54472|57190|3304|7837|85329|51267|3105|3106|6283|91851|79602|2011|1191|26959|948|3482|3135|23586|9318|2213|5592|4680|3119|7052|5599|441631|91663|3117|50650|2690
organelle membrane	Gene Ontology	GO:0031090	22	2482	7.08656e-07	2.50898e-05	23673|5175|310|1203|653145|7035|7018|2524|1191|3105|3106|79188|1291|3482|4257|3135|22941|3119|948|3117|23001|79026
cellular metabolic process	Gene Ontology	GO:0044237	50	9846	7.18199e-07	2.51285e-05	5159|56999|2299|158067|5175|10537|84441|1203|54472|6948|653145|7035|3304|7915|7837|2524|1191|79026|6283|89932|91851|79602|6202|2011|128553|90338|26959|60559|23504|60313|256987|4257|9617|23586|11145|9318|90637|5592|948|5599|22885|55109|91663|414|7052|8859|55758|2690|7508|57604
membrane region	Gene Ontology	GO:0098589	9	362	7.63976e-07	2.64193e-05	23673|948|5175|79026|10008|6281|5420|7018|91663
positive regulation of cellular process	Gene Ontology	GO:0048522	31	4559	7.88787e-07	2.69638e-05	5159|56999|2299|5175|10537|84441|54472|57190|7018|3304|1191|6281|6283|2011|3482|60313|3135|23586|22941|90637|948|3119|7052|5599|55109|91663|5420|3117|50650|22885|2690
cytoplasmic vesicle part	Gene Ontology	GO:0044433	11	604	8.76206e-07	2.96118e-05	948|7450|5175|3117|3105|3106|310|3135|1191|7018|3119
macromolecule metabolic process	Gene Ontology	GO:0043170	46	8738	1.01952e-06	3.36893e-05	5159|56999|2299|5175|10537|84441|310|1203|54472|653145|7035|3304|2524|7450|1191|79026|6283|89932|91851|6202|1291|2011|128553|286133|90338|26959|60559|60313|9617|23586|9318|90637|5592|948|5599|22885|55109|91663|414|7052|8859|64174|55758|2690|7508|57604
plasma membrane protein complex	Gene Ontology	GO:0098797	10	502	1.29162e-06	4.22117e-05	3119|3117|3105|3106|10008|54472|3135|22941|7018|6443
single organism signaling	Gene Ontology	GO:0044700	36	5972	1.33028e-06	4.30027e-05	5159|79658|5175|10537|84441|54472|57190|3304|7837|85329|51267|3105|3106|6283|91851|79602|2011|1191|26959|948|3482|3135|23586|22941|9318|2213|5592|4680|3119|7052|5599|441631|91663|3117|50650|2690
signaling	Gene Ontology	GO:0023052	36	5978	1.36262e-06	4.35744e-05	5159|79658|5175|10537|84441|54472|57190|3304|7837|85329|51267|3105|3106|6283|91851|79602|2011|1191|26959|948|3482|3135|23586|22941|9318|2213|5592|4680|3119|7052|5599|441631|91663|3117|50650|2690
membrane raft	Gene Ontology	GO:0045121	8	287	1.41354e-06	4.4722e-05	23673|948|5175|79026|10008|6281|5420|91663
membrane microdomain	Gene Ontology	GO:0098857	8	288	1.4496e-06	4.53802e-05	23673|948|5175|79026|10008|6281|5420|91663
growth factor binding	Gene Ontology	GO:0019838	6	125	1.54467e-06	4.78526e-05	5159|2690|948|3482|1291|7837
lysosome	Gene Ontology	GO:0005764	10	515	1.61608e-06	4.8895e-05	5159|3119|3117|79026|3482|1203|3257|414|6948|1291
lytic vacuole	Gene Ontology	GO:0000323	10	515	1.61608e-06	4.8895e-05	5159|3119|3117|79026|3482|1203|3257|414|6948|1291
cytoplasmic vesicle	Gene Ontology	GO:0031410	15	1258	1.62774e-06	4.8895e-05	5159|23673|3482|948|5175|7450|3117|3105|3106|310|3257|3135|1191|7018|3119
intracellular vesicle	Gene Ontology	GO:0097708	15	1260	1.65941e-06	4.8895e-05	5159|23673|3482|948|5175|7450|3117|3105|3106|310|3257|3135|1191|7018|3119
response to wounding	Gene Ontology	GO:0009611	11	646	1.66052e-06	4.8895e-05	5159|286133|5592|7450|5175|1191|948|57190|653145|7035|79602
immune system process	Gene Ontology	GO:0002376	21	2414	1.7846e-06	5.20333e-05	2213|90338|1191|948|3119|5175|23586|3117|3105|3106|10537|256987|54472|3135|5599|5420|4680|3304|6283|671|7837
ER to Golgi transport vesicle	Gene Ontology	GO:0030134	5	71	2.01207e-06	5.80961e-05	3117|3105|3106|3135|3119
multicellular organism development	Gene Ontology	GO:0007275	31	4770	2.0678e-06	5.9131e-05	112802|5159|2299|158067|5175|56999|1203|57190|7915|1191|3106|10537|91851|79602|1291|2011|128553|90338|3482|256987|4257|3135|22941|9318|7127|5592|55109|91663|5420|7052|6443
wound healing	Gene Ontology	GO:0042060	10	537	2.32845e-06	6.59507e-05	5159|286133|5592|7450|5175|948|57190|653145|7035|79602
antigen binding	Gene Ontology	GO:0003823	5	80	3.5046e-06	9.74082e-05	3117|3105|3106|3135|3119
coated vesicle	Gene Ontology	GO:0030135	7	232	3.99378e-06	0.000109977	7450|3119|3117|3105|3106|3482|3135
membrane protein complex	Gene Ontology	GO:0098796	13	1028	4.57861e-06	0.000123789	23673|3119|60559|3105|3106|3482|10008|54472|3135|3117|22941|7018|6443
interferon-gamma-mediated signaling pathway	Gene Ontology	GO:0060333	5	85	4.64597e-06	0.000124478	3117|3105|3106|3135|3119
endocytic vesicle membrane	Gene Ontology	GO:0030666	6	153	4.74495e-06	0.000125995	3119|948|3117|3105|3106|3135
phagocytic vesicle	Gene Ontology	GO:0045335	5	86	4.90564e-06	0.000128442	3135|3105|3106|23673|948
peptide binding	Gene Ontology	GO:0042277	7	240	4.95595e-06	0.000128442	3119|3117|3105|3106|4257|3135|2690
cell surface	Gene Ontology	GO:0009986	11	726	4.96664e-06	0.000128442	56999|948|5175|286133|1191|3105|3106|3482|7035|7018|2690
negative regulation of biological process	Gene Ontology	GO:0048519	29	4494	5.68479e-06	0.000145746	5159|79658|310|10008|57190|653145|7035|3304|7837|1191|3106|89932|91851|79602|26959|23504|671|3135|23586|5592|22941|9318|11145|948|5599|91663|5420|55758|7508
cell differentiation	Gene Ontology	GO:0030154	25	3519	5.85896e-06	0.000148928	5159|56999|10537|310|1203|54472|57190|727830|85329|1191|3106|6281|91851|1291|2011|4257|3135|6443|9318|7127|5592|948|55109|91663|5420
response to interferon-gamma	Gene Ontology	GO:0034341	6	160	6.07689e-06	0.000153158	3119|10537|3117|3105|3106|3135
antigen processing and presentation of exogenous peptide antigen	Gene Ontology	GO:0002478	6	161	6.28972e-06	0.00015719	3119|948|3117|3105|3106|3135
cell adhesion	Gene Ontology	GO:0007155	15	1421	6.98939e-06	0.00017322	5592|948|5175|7450|4267|3117|3119|55109|25992|6281|5420|3135|7052|1291|91663
biological adhesion	Gene Ontology	GO:0022610	15	1428	7.40561e-06	0.000182019	5592|948|5175|7450|4267|3117|3119|55109|25992|6281|5420|3135|7052|1291|91663
antigen processing and presentation of exogenous antigen	Gene Ontology	GO:0019884	6	168	7.95517e-06	0.000193924	3119|948|3117|3105|3106|3135
amide binding	Gene Ontology	GO:0033218	7	260	8.23422e-06	0.000197489	3119|3117|3105|3106|4257|3135|2690
cellular developmental process	Gene Ontology	GO:0048869	26	3837	8.47798e-06	0.000201708	5159|56999|10537|310|1203|54472|57190|727830|85329|1191|3106|6281|91851|1291|2011|4257|3135|6443|9318|7127|5592|948|55109|91663|5420|22885
positive regulation of cell adhesion	Gene Ontology	GO:0045785	8	377	9.97741e-06	0.000235499	3119|948|3117|91663|6281|5420|3135|7052
endosome	Gene Ontology	GO:0005768	11	792	1.10883e-05	0.000259658	23673|3119|3117|3105|3106|3482|3135|6948|653145|7018|7846
perinuclear region of cytoplasm	Gene Ontology	GO:0048471	10	645	1.126e-05	0.000261618	55109|79658|1191|3482|256987|1203|54472|11145|7018|3304
antigen processing and presentation of peptide antigen	Gene Ontology	GO:0048002	6	180	1.1631e-05	0.000268144	3119|948|3117|3105|3106|3135
platelet degranulation	Gene Ontology	GO:0002576	5	106	1.29569e-05	0.000296414	1191|948|7018|5175|7450
endosome membrane	Gene Ontology	GO:0010008	8	397	1.43685e-05	0.000326197	23673|3119|3117|3105|3106|3135|653145|7018
system development	Gene Ontology	GO:0048731	27	4206	1.45049e-05	0.000326801	112802|5159|2299|158067|5175|10537|1203|57190|7915|1191|3106|91851|79602|2011|90338|3482|256987|4257|3135|22941|9318|7127|5592|55109|5420|7052|6443
cellular macromolecule metabolic process	Gene Ontology	GO:0044260	41	8101	1.58661e-05	0.000353251	5159|56999|2299|5175|10537|84441|1203|54472|653145|7035|3304|2524|1191|79026|6283|89932|91851|6202|2011|128553|90338|26959|60559|60313|9617|23586|9318|90637|5592|948|5599|22885|55109|91663|414|7052|8859|55758|57604|7508|2690
regulation of immune response	Gene Ontology	GO:0050776	11	824	1.59165e-05	0.000353251	2213|1191|948|3119|23586|3117|3105|3106|3135|5599|3304
multi-organism process	Gene Ontology	GO:0051704	19	2352	1.68764e-05	0.000371782	2213|3482|948|23586|105372315|3105|3106|310|256987|4257|6283|5599|22941|6202|1191|3304|727830|671|79602
defense response	Gene Ontology	GO:0006952	15	1535	1.71826e-05	0.000375742	1191|948|3119|23586|3117|3105|3106|10537|256987|54472|3135|51267|3304|6283|671
response to organic substance	Gene Ontology	GO:0010033	21	2810	1.81449e-05	0.00039389	5159|23586|3482|7837|948|3119|91851|3117|3105|3106|310|4257|3135|5599|57190|79602|1191|3304|1291|10537|2690
cellular response to chemical stimulus	Gene Ontology	GO:0070887	20	2587	1.83867e-05	0.000396247	5159|90637|1191|7837|948|3119|91851|3117|3105|3106|4257|6283|3135|5599|57190|79602|7018|3304|1291|2690
side of membrane	Gene Ontology	GO:0098552	8	412	1.86422e-05	0.000397581	948|5175|3119|3117|3105|3106|3135|7018
response to chemical	Gene Ontology	GO:0042221	26	4014	1.8716e-05	0.000397581	5159|10537|310|57190|7018|3304|7837|1191|3105|3106|6283|91851|79602|1291|2877|3482|4257|3135|23586|90637|3119|948|3117|5599|7508|2690
cytokine-mediated signaling pathway	Gene Ontology	GO:0019221	9	543	1.88873e-05	0.000398375	3119|3117|3105|3106|3135|79602|3304|2690|7837
regulation of response to stimulus	Gene Ontology	GO:0048583	24	3560	2.23339e-05	0.000467754	5159|79658|5175|10537|57190|3304|7837|1191|3105|3106|6283|91851|286133|3135|23586|2213|5592|948|3119|3117|91663|5599|50650|2690
vesicle-mediated transport	Gene Ontology	GO:0016192	14	1382	2.27809e-05	0.00047378	286133|23673|7450|5175|56999|1191|948|3482|6281|91828|7052|7018|7127|2690
single-organism localization	Gene Ontology	GO:1902578	21	2861	2.36611e-05	0.000488668	23673|1191|7450|5175|7052|5599|948|10008|6281|6283|91828|23586|7018|57190|79602|6202|348932|7127|6948|91663|2690
endosomal part	Gene Ontology	GO:0044440	8	430	2.5135e-05	0.000515527	23673|3119|3117|3105|3106|3135|653145|7018
protein metabolic process	Gene Ontology	GO:0019538	30	5191	3.22755e-05	0.000652975	5159|56999|5175|10537|1203|54472|653145|7035|3304|2524|7450|1191|6283|89932|6202|64174|2011|60559|9617|9318|90637|5592|948|5599|91663|414|7052|8859|7508|2690
integral component of endoplasmic reticulum membrane	Gene Ontology	GO:0030176	5	130	3.33078e-05	0.000669306	3117|3105|3106|3135|3119
cytosol	Gene Ontology	GO:0005829	23	3407	3.36856e-05	0.000672355	23673|79658|158067|310|54472|653145|3304|3257|1191|79026|155038|6283|6202|2877|23586|11145|7846|5592|948|5599|7052|55303|50650
protein complex	Gene Ontology	GO:0043234	25	3913	3.55007e-05	0.000703861	23673|10008|91828|54472|7018|3304|1191|3105|3106|3257|1291|60559|3482|3135|22941|9318|7127|90637|3119|3117|23001|55758|2690|7508|6443
negative regulation of cellular process	Gene Ontology	GO:0048523	26	4171	3.61802e-05	0.000712582	5159|79658|10008|57190|653145|7035|3304|7837|1191|89932|91851|79602|26959|23504|671|3135|11145|22941|9318|5592|948|5599|91663|5420|55758|7508
antigen processing and presentation	Gene Ontology	GO:0019882	6	223	3.74849e-05	0.000728628	3119|948|3117|3105|3106|3135
protein oligomerization	Gene Ontology	GO:0051259	8	459	3.9539e-05	0.000760486	286133|7450|1191|79026|6281|4257|1291|7915
intrinsic component of endoplasmic reticulum membrane	Gene Ontology	GO:0031227	5	135	3.96353e-05	0.000760486	3117|3105|3106|3135|3119
cellular response to interferon-gamma	Gene Ontology	GO:0071346	5	138	4.38552e-05	0.000830736	3117|3105|3106|3135|3119
coated vesicle membrane	Gene Ontology	GO:0030662	5	140	4.68561e-05	0.000881962	3117|3105|3106|3135|3119
regulation of molecular function	Gene Ontology	GO:0065009	20	2773	4.88549e-05	0.000913802	5159|5592|79658|5599|79026|23504|10008|256987|6281|89932|23586|57190|653145|7035|1191|50650|3304|6283|2011|2690
cytoplasmic vesicle membrane	Gene Ontology	GO:0030659	8	478	5.22928e-05	0.000965954	948|5175|3119|3117|3105|3106|310|3135
regulation of cell adhesion	Gene Ontology	GO:0030155	9	629	5.79888e-05	0.00106456	5592|3119|948|3117|91663|6281|5420|3135|7052
cell surface receptor signaling pathway	Gene Ontology	GO:0007166	19	2583	5.99136e-05	0.00109315	5159|441631|948|3117|3119|91851|84441|3105|3106|3482|3135|5599|26959|79602|51267|3304|7837|2011|2690
hemostasis	Gene Ontology	GO:0007599	7	358	6.05768e-05	0.00109851	286133|5592|7450|948|310|653145|7035
response to cytokine	Gene Ontology	GO:0034097	10	797	6.56361e-05	0.00117591	3119|10537|3117|3105|3106|3135|79602|3304|2690|7837
vesicle membrane	Gene Ontology	GO:0012506	8	497	6.83076e-05	0.00121645	948|5175|3119|3117|3105|3106|310|3135
animal organ development	Gene Ontology	GO:0048513	21	3087	7.09787e-05	0.00125628	112802|5159|2299|5592|158067|5175|10537|1191|3106|3482|90338|4257|79602|3135|91851|57190|1203|9318|5420|7052|6443
macromolecular complex	Gene Ontology	GO:0032991	27	4606	7.13894e-05	0.00125628	23673|10008|91828|54472|7018|3304|1191|3105|3106|3257|6202|1291|60559|3482|3135|22941|9318|7127|7846|90637|3119|3117|23001|55758|2690|7508|6443
endoplasmic reticulum part	Gene Ontology	GO:0044432	12	1158	7.3817e-05	0.00128778	3135|3119|60559|3105|3106|310|4257|414|3117|57190|79188|1291
carbohydrate derivative binding	Gene Ontology	GO:0097367	17	2174	7.40452e-05	0.00128778	5159|7280|6782|158067|7450|5599|155038|3482|671|23586|8859|55303|5592|3304|7846|2011|55665
regulation of metabolic process	Gene Ontology	GO:0019222	32	5989	7.54483e-05	0.00130455	5159|9617|2299|5175|84441|310|54472|653145|7035|3304|85329|1191|79026|6283|89932|91851|2011|128553|286133|90338|26959|23504|60313|23586|9318|90637|948|5599|91663|55758|22885|2690
transport vesicle membrane	Gene Ontology	GO:0030658	5	156	7.69751e-05	0.00132326	3117|3105|3106|3135|3119
single-organism transport	Gene Ontology	GO:0044765	19	2654	8.56564e-05	0.00145552	23673|7450|5175|7052|1191|948|10008|91828|6283|23586|7018|6948|57190|79602|6202|348932|7127|91663|2690
cytoskeleton	Gene Ontology	GO:0005856	16	1983	8.61372e-05	0.00145552	112802|3884|7280|158067|79026|22852|6283|23586|26059|22941|22885|3304|7846|2011|91663|6443
membrane organization	Gene Ontology	GO:0061024	11	1004	9.2467e-05	0.00155365	23673|948|5599|310|91663|6281|1191|6443|6202|79188|3304
exocytosis	Gene Ontology	GO:0006887	7	386	9.5993e-05	0.0015975	5175|948|1191|7450|91828|7018|7127
response to oxidative stress	Gene Ontology	GO:0006979	7	387	9.75161e-05	0.00161118	5159|2877|948|4257|57190|3304|7837
focal adhesion	Gene Ontology	GO:0005925	7	388	9.90589e-05	0.00162763	5159|4267|7052|79026|3482|6202|3304
cellular component assembly	Gene Ontology	GO:0022607	18	2458	0.0001018	0.00166348	5159|286133|23673|948|7450|10537|1191|79026|91663|6281|4257|5420|22941|22885|3304|1291|7508|7915
cell-substrate adherens junction	Gene Ontology	GO:0005924	7	391	0.000103807	0.001687	5159|4267|7052|79026|3482|6202|3304
cellular protein metabolic process	Gene Ontology	GO:0044267	27	4725	0.000109969	0.00176166	5159|9617|5175|10537|1203|54472|653145|7035|3304|2524|1191|6283|89932|6202|2011|60559|9318|90637|5592|948|5599|91663|414|7052|8859|7508|2690
cell-substrate junction	Gene Ontology	GO:0030055	7	395	0.000110424	0.00176166	5159|4267|7052|79026|3482|6202|3304
lytic vacuole membrane	Gene Ontology	GO:0098852	6	273	0.000111362	0.00176166	3119|3117|79026|3482|1203|1291
lysosomal membrane	Gene Ontology	GO:0005765	6	273	0.000111362	0.00176166	3119|3117|79026|3482|1203|1291
cellular response to cytokine stimulus	Gene Ontology	GO:0071345	9	689	0.000114596	0.00179373	3119|3117|3105|3106|3135|79602|3304|2690|7837
small molecule binding	Gene Ontology	GO:0036094	18	2487	0.000117854	0.00183507	5159|7280|6782|158067|5599|155038|3482|1203|23586|8859|55303|6948|5592|3304|7846|2011|55665|7915
cellular component biogenesis	Gene Ontology	GO:0044085	19	2724	0.000120227	0.00186226	5159|286133|23673|948|7450|10537|1191|79026|91663|6281|4257|5420|22941|6202|22885|3304|1291|7508|7915
cell activation	Gene Ontology	GO:0001775	10	860	0.000121537	0.0018728	5592|7450|3119|10537|3117|671|54472|3135|1191|6283
ion binding	Gene Ontology	GO:0043167	25	4228	0.000124098	0.00190241	56999|59084|57190|653145|7018|7915|7837|7052|6281|6283|89932|79602|64174|6948|128553|90338|310|3482|23586|90637|2011|25992|414|23001|22885
catalytic activity	Gene Ontology	GO:0003824	30	5590	0.000127374	0.00194262	5159|56999|7280|158067|79091|57190|3304|7915|7837|2524|7052|89932|64174|2011|59084|2877|60559|3482|4257|23586|11145|7846|93517|5592|5599|414|8859|23001|131965|57604
regulation of macromolecule metabolic process	Gene Ontology	GO:0060255	30	5638	0.000148577	0.00222045	5159|9617|2299|5175|84441|310|54472|653145|7035|3304|1191|79026|6283|89932|91851|2011|128553|286133|90338|26959|60313|23586|9318|90637|948|5599|91663|55758|22885|2690
structural molecule activity	Gene Ontology	GO:0005198	9	719	0.000156959	0.00233398	112802|3884|7280|105372315|79026|22941|6202|7846|7837
intracellular signal transduction	Gene Ontology	GO:0035556	18	2598	0.000201901	0.00298733	5159|5592|79658|85329|5175|10537|5599|948|91663|54472|23586|57190|1191|50650|3304|6283|2011|2690
cellular response to organic substance	Gene Ontology	GO:0071310	16	2149	0.000214767	0.00310057	5159|1191|7837|948|3119|91851|3117|3105|3106|3135|5599|57190|79602|3304|1291|2690
regulation of biological quality	Gene Ontology	GO:0065008	21	3386	0.00025555	0.00363639	286133|23673|5592|948|7450|7052|5599|91663|310|10008|79602|1203|6283|1191|57190|653145|22941|7018|3304|7915|7035
nitrogen compound metabolic process	Gene Ontology	GO:0006807	33	6685	0.000258679	0.00366339	5159|9617|2299|158067|84441|1203|6948|3304|7915|1191|79026|6283|91851|6202|128553|90338|26959|60559|60313|256987|4257|23586|9318|11145|948|5599|22885|55109|414|55758|57604|7508|2690
immune response-regulating signaling pathway	Gene Ontology	GO:0002764	7	456	0.00026167	0.00367079	948|3119|23586|3117|3135|5599|3304
response to toxic substance	Gene Ontology	GO:0009636	5	210	0.00029623	0.00412457	5159|2877|948|4257|7837
adherens junction	Gene Ontology	GO:0005912	7	466	0.000297622	0.00412457	5159|4267|7052|79026|3482|6202|3304
cytokine production	Gene Ontology	GO:0001816	8	619	0.000298179	0.00412457	948|1191|3106|671|6283|3135|23586|3304
single-organism metabolic process	Gene Ontology	GO:0044710	23	3962	0.000321061	0.00440017	5159|158067|1203|57190|3304|7915|7837|2524|85329|1191|6283|79602|1291|2877|256987|4257|93517|11145|948|5599|414|6948|2690
purine ribonucleoside triphosphate binding	Gene Ontology	GO:0035639	14	1788	0.000334937	0.00456927	5159|7280|6782|158067|5599|155038|23586|8859|55303|5592|3304|7846|2011|55665
regulation of primary metabolic process	Gene Ontology	GO:0080090	29	5629	0.000345803	0.00467446	5159|9617|2299|5175|84441|54472|653145|7035|3304|85329|1191|79026|6283|89932|91851|2011|128553|90338|26959|60313|23586|9318|90637|948|5599|91663|55758|22885|2690
regulation of immune system process	Gene Ontology	GO:0002682	12	1372	0.00034744	0.00467446	2213|1191|948|3119|23586|3117|3105|3106|671|3135|5599|3304
transport vesicle	Gene Ontology	GO:0030133	6	339	0.000348934	0.00467446	3119|3117|3105|3106|3482|3135
purine ribonucleoside binding	Gene Ontology	GO:0032550	14	1798	0.000354065	0.00472192	5159|7280|6782|158067|5599|155038|23586|8859|55303|5592|3304|7846|2011|55665
ribonucleoside binding	Gene Ontology	GO:0032549	14	1801	0.000359983	0.00475818	5159|7280|6782|158067|5599|155038|23586|8859|55303|5592|3304|7846|2011|55665
purine nucleoside binding	Gene Ontology	GO:0001883	14	1801	0.000359983	0.00475818	5159|7280|6782|158067|5599|155038|23586|8859|55303|5592|3304|7846|2011|55665
nucleoside binding	Gene Ontology	GO:0001882	14	1808	0.000374124	0.00492321	5159|7280|6782|158067|5599|155038|23586|8859|55303|5592|3304|7846|2011|55665
anchoring junction	Gene Ontology	GO:0070161	7	486	0.000381435	0.0049973	5159|4267|7052|79026|3482|6202|3304
regulation of cellular metabolic process	Gene Ontology	GO:0031323	29	5685	0.000408374	0.00528045	5159|9617|2299|5175|84441|54472|653145|7035|3304|1191|79026|6283|89932|91851|2011|128553|90338|26959|23504|60313|23586|9318|90637|948|5599|91663|55758|22885|2690
purine ribonucleotide binding	Gene Ontology	GO:0032555	14	1830	0.000421715	0.00538665	5159|7280|6782|158067|5599|155038|23586|8859|55303|5592|3304|7846|2011|55665
metal ion binding	Gene Ontology	GO:0046872	23	4039	0.000421966	0.00538665	56999|59084|57190|653145|7018|7837|7052|6281|6283|89932|79602|64174|6948|128553|90338|310|23586|90637|2011|25992|414|23001|22885
heterocyclic compound binding	Gene Ontology	GO:1901363	29	5701	0.000428016	0.00542635	5159|9617|2299|7280|158067|310|6948|3304|7915|7837|6782|79026|155038|6202|55665|2011|128553|90338|26959|60313|23586|7846|5592|5599|55109|8859|55303|55758|7508
blood coagulation	Gene Ontology	GO:0007596	6	353	0.000430572	0.00542635	286133|5592|7450|948|653145|7035
regulation of catalytic activity	Gene Ontology	GO:0050790	16	2289	0.000430605	0.00542635	5159|5592|79658|5599|23504|256987|6281|89932|1191|653145|7035|50650|3304|6283|2011|2690
regulation of cellular protein metabolic process	Gene Ontology	GO:0032268	16	2295	0.000443019	0.00555923	5159|90637|948|5175|9617|5599|91663|54472|89932|1191|653145|7035|3304|6283|2011|2690
secretory granule	Gene Ontology	GO:0030141	6	356	0.000449861	0.00559785	5175|948|1191|310|7018|7450
purine nucleotide binding	Gene Ontology	GO:0017076	14	1843	0.000452206	0.00560359	5159|7280|6782|158067|5599|155038|23586|8859|55303|5592|3304|7846|2011|55665
ribonucleotide binding	Gene Ontology	GO:0032553	14	1846	0.000459505	0.00566761	5159|7280|6782|158067|5599|155038|23586|8859|55303|5592|3304|7846|2011|55665
coagulation	Gene Ontology	GO:0050817	6	358	0.000463089	0.00566761	286133|5592|7450|948|653145|7035
apical part of cell	Gene Ontology	GO:0045177	6	360	0.00047662	0.00580929	5159|948|5420|4257|22941|7018
cation binding	Gene Ontology	GO:0043169	23	4078	0.000483028	0.00584144	56999|59084|57190|653145|7018|7837|7052|6281|6283|89932|79602|64174|6948|128553|90338|310|23586|90637|2011|25992|414|23001|22885
regulation of body fluid levels	Gene Ontology	GO:0050878	7	506	0.000483186	0.00584144	286133|5592|7450|948|310|653145|7035
Golgi membrane	Gene Ontology	GO:0000139	8	676	0.000529707	0.00632671	2524|23673|3119|3117|3105|3106|3482|3135
organic cyclic compound binding	Gene Ontology	GO:0097159	29	5780	0.000537885	0.00639868	5159|9617|2299|7280|158067|310|6948|3304|7915|7837|6782|79026|155038|6202|55665|2011|128553|90338|26959|60313|23586|7846|5592|5599|55109|8859|55303|55758|7508
regulation of cell-cell adhesion	Gene Ontology	GO:0022407	6	375	0.000588199	0.00686002	5592|3119|3117|91663|5420|3135
positive regulation of response to stimulus	Gene Ontology	GO:0048584	14	1903	0.000618622	0.00715868	5159|1191|948|3119|5175|23586|3117|3105|10537|6283|5599|57190|3304|2690
cellular cation homeostasis	Gene Ontology	GO:0030003	7	529	0.000625835	0.00719037	286133|948|7052|310|1203|57190|7018
symbiosis, encompassing mutualism through parasitism	Gene Ontology	GO:0044403	10	1062	0.000632874	0.00719037	2213|1191|948|105372315|3105|3106|256987|23586|6202|3304
interspecies interaction between organisms	Gene Ontology	GO:0044419	10	1062	0.000632874	0.00719037	2213|1191|948|105372315|3105|3106|256987|23586|6202|3304
leukocyte activation	Gene Ontology	GO:0045321	8	700	0.000663099	0.00745092	3119|10537|3117|671|6283|3135|1191|54472
guanyl ribonucleotide binding	Gene Ontology	GO:0032561	6	386	0.00068218	0.00762708	7280|155038|55303|5592|55665|7846
guanyl nucleotide binding	Gene Ontology	GO:0019001	6	387	0.000691268	0.0076807	7280|155038|55303|5592|55665|7846
lipid metabolic process	Gene Ontology	GO:0006629	11	1275	0.000692141	0.0076807	5159|93517|11145|948|85329|1191|256987|414|79602|7915|2690
cellular ion homeostasis	Gene Ontology	GO:0006873	7	542	0.000720158	0.00796189	286133|948|7052|310|1203|57190|7018
protein homooligomerization	Gene Ontology	GO:0051260	5	263	0.000804502	0.00879628	1191|286133|7450|4257|7915
receptor-mediated endocytosis	Gene Ontology	GO:0006898	5	266	0.000845536	0.00912422	286133|3482|7018|948|2690
response to other organism	Gene Ontology	GO:0051707	9	910	0.000846767	0.00912422	1191|948|5599|3105|256987|4257|6283|23586|671
response to external biotic stimulus	Gene Ontology	GO:0043207	9	910	0.000846767	0.00912422	1191|948|5599|3105|256987|4257|6283|23586|671
mitochondrion organization	Gene Ontology	GO:0007005	8	728	0.000851741	0.00914468	9617|5592|5599|22885|1191|57190|3304|2011
regulation of protein metabolic process	Gene Ontology	GO:0051246	16	2443	0.000863897	0.009229	5159|90637|948|5175|9617|5599|91663|54472|89932|1191|653145|7035|3304|6283|2011|2690
regulation of cytokine production	Gene Ontology	GO:0001817	7	560	0.000869003	0.00923005	948|1191|3106|671|3135|23586|3304
regulation of hydrolase activity	Gene Ontology	GO:0051336	11	1316	0.000893666	0.00942469	5159|5592|79658|5599|23504|6281|89932|653145|7035|50650|3304
regulated exocytosis	Gene Ontology	GO:0045055	5	271	0.000917369	0.00964048	1191|948|7018|5175|7450
autophagy	Gene Ontology	GO:0006914	7	569	0.000952021	0.0098652	23673|5592|5599|310|54472|23001|2011
positive regulation of transport	Gene Ontology	GO:0051050	9	928	0.000969759	0.0100141	5159|26959|948|5599|10008|23586|79602|7018|22885
divalent inorganic cation transport	Gene Ontology	GO:0072511	6	422	0.00107313	0.0108554	5159|79026|10008|6948|57190|7018
extracellular matrix	Gene Ontology	GO:0031012	6	423	0.00108601	0.0109485	56999|7450|1191|89932|1291|7837
positive regulation of molecular function	Gene Ontology	GO:0044093	13	1791	0.00110398	0.011084	5159|1191|79658|5599|10008|256987|6281|23586|50650|3304|6283|2011|2690
response to biotic stimulus	Gene Ontology	GO:0009607	9	946	0.00110691	0.011084	1191|948|5599|3105|256987|4257|6283|23586|671
positive regulation of developmental process	Gene Ontology	GO:0051094	10	1147	0.00112798	0.0112366	5159|56999|948|1191|55109|91663|6281|3135|2011|2690
phosphate-containing compound metabolic process	Gene Ontology	GO:0006796	18	3008	0.00112974	0.0112366	5159|5592|158067|5175|5599|948|23504|91663|256987|54472|1191|8859|11145|3304|6283|2011|7915|2690
gene expression	Gene Ontology	GO:0010467	26	5182	0.00113349	0.0112366	9617|2299|84441|310|1203|3304|1191|79026|6283|91851|6202|128553|286133|90338|26959|60559|60313|23586|9318|948|5599|55109|91663|55758|22885|57604
anatomical structure morphogenesis	Gene Ontology	GO:0009653	16	2513	0.00116027	0.0114633	112802|5159|2299|55109|948|1191|22885|310|91663|6281|5420|7052|79602|7127|1291|2011
phosphorus metabolic process	Gene Ontology	GO:0006793	18	3016	0.00116406	0.0114633	5159|5592|158067|5175|5599|948|23504|91663|256987|54472|1191|8859|11145|3304|6283|2011|7915|2690
endocytosis	Gene Ontology	GO:0006897	7	595	0.00122743	0.0118905	286133|5175|948|7052|3482|7018|2690
apical plasma membrane	Gene Ontology	GO:0016324	5	290	0.00123236	0.0118995	5159|7018|22941|948|5420
early endosome	Gene Ontology	GO:0005769	5	293	0.00128858	0.0124021	3135|3105|3106|3482|7018
cell projection membrane	Gene Ontology	GO:0031253	5	294	0.00130774	0.0124827	23586|5420|22941|948|348932
cation homeostasis	Gene Ontology	GO:0055080	7	605	0.00134862	0.0127733	286133|948|7052|310|1203|57190|7018
positive regulation of immune response	Gene Ontology	GO:0050778	7	609	0.00139964	0.0131385	1191|3119|948|3117|3105|23586|3304
nucleotide binding	Gene Ontology	GO:0000166	15	2314	0.00140341	0.0131385	5159|7280|6782|158067|5599|155038|23586|8859|55303|5592|3304|7846|2011|55665|7915
nucleoside phosphate binding	Gene Ontology	GO:1901265	15	2315	0.00140936	0.0131385	5159|7280|6782|158067|5599|155038|23586|8859|55303|5592|3304|7846|2011|55665|7915
endoplasmic reticulum membrane	Gene Ontology	GO:0005789	9	981	0.00141861	0.0131385	3119|60559|3105|3106|310|4257|3135|3117|57190
organelle organization	Gene Ontology	GO:0006996	20	3604	0.00146058	0.0134067	112802|5159|23673|5592|79658|9617|5599|2011|91663|6281|1203|3257|1191|57190|653145|9318|79188|22885|3304|7508
cell-substrate adhesion	Gene Ontology	GO:0031589	5	302	0.00146866	0.0134394	948|91663|25992|6281|7450
lipid binding	Gene Ontology	GO:0008289	7	616	0.00149255	0.0135761	310|948|3482|671|23001|653145|2011
metal ion transport	Gene Ontology	GO:0030001	8	796	0.00149274	0.0135761	5159|286133|26959|79026|10008|57190|7018|6948
inorganic ion homeostasis	Gene Ontology	GO:0098771	7	619	0.00153382	0.0138692	286133|948|7052|310|1203|57190|7018
response to external stimulus	Gene Ontology	GO:0009605	14	2106	0.00161918	0.0143744	5159|286133|5592|948|5599|3105|256987|4257|6283|23586|79602|1191|7508|671
nuclear outer membrane-endoplasmic reticulum membrane network	Gene Ontology	GO:0042175	9	1002	0.00163732	0.0144492	3119|60559|3105|3106|310|4257|3135|3117|57190
nucleus	Gene Ontology	GO:0005634	31	6803	0.00166161	0.0146202	5159|2299|7280|10537|84441|79091|54472|3304|85329|1191|79026|155038|6283|6202|79188|55665|128553|90338|310|26959|3482|60313|4257|9318|7846|90637|5599|8859|23001|55758|7508
cellular metal ion homeostasis	Gene Ontology	GO:0006875	6	461	0.00167037	0.014654	286133|948|7052|310|57190|7018
secretory vesicle	Gene Ontology	GO:0099503	6	465	0.00174354	0.0151533	5175|948|1191|310|7018|7450
regulation of intracellular signal transduction	Gene Ontology	GO:1902531	12	1662	0.00180294	0.0155159	5159|79658|948|5175|10537|1191|91663|6283|57190|50650|3304|2690
protein localization	Gene Ontology	GO:0008104	15	2383	0.00186755	0.01596	56999|23673|1191|7018|948|5599|91663|6281|54472|91828|23586|6202|7127|6283|22885
organonitrogen compound metabolic process	Gene Ontology	GO:1901564	14	2144	0.00190947	0.0162178	5159|9617|11145|60559|256987|4257|414|1191|6948|1203|6202|3304|7915|2690
cellular nitrogen compound metabolic process	Gene Ontology	GO:0034641	29	6259	0.00191407	0.0162178	5159|9617|2299|158067|84441|1203|3304|7915|1191|79026|6283|91851|6202|128553|90338|26959|60559|60313|4257|23586|9318|948|5599|22885|55109|55758|57604|7508|2690
extracellular matrix organization	Gene Ontology	GO:0030198	5	323	0.00196028	0.0165152	948|1291|5175|7450|7837
extracellular structure organization	Gene Ontology	GO:0043062	5	324	0.00198635	0.0166876	948|1291|5175|7450|7837
viral process	Gene Ontology	GO:0016032	9	1032	0.00199603	0.0167216	2213|1191|105372315|3105|3106|256987|23586|6202|3304
receptor binding	Gene Ontology	GO:0005102	11	1458	0.0020032	0.0167346	5159|7450|3106|310|54472|3135|22941|7018|3304|6283|7837
regulation of metal ion transport	Gene Ontology	GO:0010959	5	325	0.00201267	0.0167666	5159|79026|57190|10008|26959
activation of immune response	Gene Ontology	GO:0002253	6	480	0.00203979	0.0168741	1191|3119|948|3117|23586|3304
regulation of localization	Gene Ontology	GO:0032879	15	2405	0.00204021	0.0168741	5159|948|26959|5175|5599|79026|10008|5420|23586|57190|79602|7018|3304|22885|91663
multi-organism cellular process	Gene Ontology	GO:0044764	9	1036	0.00204827	0.0168741	2213|1191|105372315|3105|3106|256987|23586|6202|3304
cytoskeletal part	Gene Ontology	GO:0044430	11	1468	0.00211159	0.0172999	112802|3884|7280|158067|22885|22852|22941|3304|7846|2011|91663
ion homeostasis	Gene Ontology	GO:0050801	7	657	0.00213761	0.017465	286133|948|7052|310|1203|57190|7018
single-organism membrane organization	Gene Ontology	GO:0044802	8	857	0.00235023	0.0188908	23673|5599|91663|6281|1191|6202|79188|3304
tissue development	Gene Ontology	GO:0009888	12	1723	0.00242232	0.0193137	112802|5159|5175|7052|310|91663|5420|54472|57190|6443|9318|1291
cellular chemical homeostasis	Gene Ontology	GO:0055082	7	674	0.00246096	0.0195693	286133|948|7052|310|1203|57190|7018
regulation of cellular component organization	Gene Ontology	GO:0051128	14	2218	0.00260005	0.0204565	5159|9617|948|5599|22885|310|91663|6281|5420|1191|79602|7018|3304|2011
intracellular organelle lumen	Gene Ontology	GO:0070013	22	4356	0.00271493	0.0211136	5159|10537|84441|1203|54472|6948|7018|3304|7915|7450|1191|155038|6202|79188|1291|26959|3482|9318|5599|414|23001|7508
membrane-enclosed lumen	Gene Ontology	GO:0031974	22	4357	0.00272261	0.0211136	5159|10537|84441|1203|54472|6948|7018|3304|7915|7450|1191|155038|6202|79188|1291|26959|3482|9318|5599|414|23001|7508
organelle lumen	Gene Ontology	GO:0043233	22	4357	0.00272261	0.0211136	5159|10537|84441|1203|54472|6948|7018|3304|7915|7450|1191|155038|6202|79188|1291|26959|3482|9318|5599|414|23001|7508
positive regulation of immune system process	Gene Ontology	GO:0002684	8	879	0.00274037	0.0211136	1191|948|3119|3117|3105|3135|23586|3304
positive regulation of catalytic activity	Gene Ontology	GO:0043085	11	1520	0.00275511	0.0211724	5159|79658|5599|256987|6281|1191|50650|3304|6283|2011|2690
positive regulation of intracellular signal transduction	Gene Ontology	GO:1902533	8	882	0.00279728	0.021441	5159|5175|948|10537|1191|6283|3304|2690
intracellular non-membrane-bounded organelle	Gene Ontology	GO:0043232	20	3816	0.00285607	0.0217781	112802|3884|7280|158067|5175|10537|2011|22852|6283|23586|26059|22941|6202|79026|22885|3304|7846|7508|91663|6443
non-membrane-bounded organelle	Gene Ontology	GO:0043228	20	3816	0.00285607	0.0217781	112802|3884|7280|158067|5175|10537|2011|22852|6283|23586|26059|22941|6202|79026|22885|3304|7846|7508|91663|6443
Golgi apparatus part	Gene Ontology	GO:0044431	8	886	0.00287459	0.0217781	2524|23673|3119|3117|3105|3106|3482|3135
proteinaceous extracellular matrix	Gene Ontology	GO:0005578	5	354	0.00289251	0.0217781	89932|56999|1291|7450|7837
positive regulation of macromolecule metabolic process	Gene Ontology	GO:0010604	16	2767	0.00306279	0.0228354	5159|90637|2299|1191|948|5175|23586|84441|22885|60313|54472|5599|3304|6283|2011|2690
regulation of transport	Gene Ontology	GO:0051049	12	1774	0.00306523	0.0228354	5159|948|26959|5599|79026|10008|23586|57190|79602|7018|3304|22885
cellular protein localization	Gene Ontology	GO:0034613	11	1542	0.00307134	0.0228354	23673|948|5599|91663|6281|54472|91828|23586|6202|7127|22885
response to bacterium	Gene Ontology	GO:0009617	6	524	0.0031305	0.0230897	948|5599|3105|671|4257|6283
transferase activity	Gene Ontology	GO:0016740	14	2269	0.00318735	0.0232299	5159|2524|3482|5592|158067|5599|79091|4257|131965|7052|8859|23001|2011|57604
cellular macromolecule localization	Gene Ontology	GO:0070727	11	1550	0.00319336	0.0232299	23673|948|5599|91663|6281|54472|91828|23586|6202|7127|22885
regulation of sequence-specific DNA binding transcription factor activity	Gene Ontology	GO:0051090	5	363	0.00321465	0.0232299	5599|23586|3304|1191|6283
metal ion homeostasis	Gene Ontology	GO:0055065	6	527	0.00321813	0.0232299	286133|948|7052|310|57190|7018
proteolysis	Gene Ontology	GO:0006508	11	1559	0.00333528	0.0240172	90637|56999|10537|60559|1203|89932|1191|653145|7035|9318|64174
macromolecule modification	Gene Ontology	GO:0043412	20	3871	0.00336328	0.0241203	5159|2524|5592|948|5175|10537|5599|2011|91663|54472|414|6283|8859|9318|1191|3304|2690|7508|7052|57604
GTP binding	Gene Ontology	GO:0005525	5	367	0.00336582	0.0241203	155038|55303|7846|55665|7280
molecular function regulator	Gene Ontology	GO:0098772	10	1341	0.00347986	0.0247586	5159|5592|79658|5599|10008|89932|7035|50650|2011|7837
cellular amide metabolic process	Gene Ontology	GO:0043603	8	917	0.00353199	0.0250696	9617|60559|4257|1191|1203|6202|7915|2690
cell projection part	Gene Ontology	GO:0044463	8	918	0.00355499	0.0251727	158067|948|1191|348932|5420|23586|26059|22941
anatomical structure formation involved in morphogenesis	Gene Ontology	GO:0048646	9	1129	0.0036051	0.0254669	5159|948|7052|55109|5420|79602|7127|1291|22885
plasma membrane region	Gene Ontology	GO:0098590	8	932	0.00388935	0.0270888	5159|948|348932|5420|23586|26059|22941|7018
protein complex biogenesis	Gene Ontology	GO:0070271	10	1365	0.00393777	0.0272982	286133|948|7450|1191|79026|91663|6281|4257|1291|7915
protein complex assembly	Gene Ontology	GO:0006461	10	1365	0.00393777	0.0272982	286133|948|7450|1191|79026|91663|6281|4257|1291|7915
regulation of multicellular organismal process	Gene Ontology	GO:0051239	15	2581	0.00396371	0.0274141	5159|286133|5592|948|1191|3106|55109|91663|671|3135|23586|57190|3304|2011|2690
protein complex subunit organization	Gene Ontology	GO:0071822	11	1596	0.00397311	0.0274153	286133|948|7450|9617|1191|79026|91663|6281|4257|1291|7915
regulation of gene expression	Gene Ontology	GO:0010468	21	4211	0.00398603	0.0274409	286133|2299|1191|948|26959|23586|91851|84441|79026|310|60313|90338|6283|55758|5599|9318|22885|3304|9617|91663|128553
positive regulation of cytokine production	Gene Ontology	GO:0001819	5	383	0.004022	0.0274975	3135|23586|3304|1191|948
positive regulation of cellular component organization	Gene Ontology	GO:0051130	9	1150	0.00406042	0.0276672	5159|948|5599|22885|91663|6281|1191|7018|2011
secretion by cell	Gene Ontology	GO:0032940	8	939	0.00406542	0.0276672	5175|948|1191|7450|91828|6283|7018|7127
regulation of apoptotic process	Gene Ontology	GO:0042981	10	1379	0.00422622	0.0285716	5159|79658|10537|5599|155038|3482|1191|50650|3304|7052
single organism cell adhesion	Gene Ontology	GO:0098602	7	745	0.00423675	0.0285716	5592|3119|3117|91663|6281|5420|3135
macromolecular complex assembly	Gene Ontology	GO:0065003	11	1619	0.00441655	0.0296497	286133|948|7450|1191|79026|91663|6281|4257|1291|7508|7915
cation transport	Gene Ontology	GO:0006812	8	953	0.00443601	0.0296984	5159|286133|26959|79026|10008|57190|7018|6948
regulation of programmed cell death	Gene Ontology	GO:0043067	10	1391	0.00448659	0.0297837	5159|79658|10537|5599|155038|3482|1191|50650|3304|7052
positive regulation of apoptotic process	Gene Ontology	GO:0043065	6	568	0.00460804	0.030454	7052|5599|3482|1191|50650|10537
protein modification process	Gene Ontology	GO:0036211	19	3707	0.00468251	0.0308092	5159|2524|5592|948|5175|10537|5599|2011|91663|54472|414|1191|8859|9318|3304|6283|7508|7052|2690
cellular protein modification process	Gene Ontology	GO:0006464	19	3707	0.00468251	0.0308092	5159|2524|5592|948|5175|10537|5599|2011|91663|54472|414|1191|8859|9318|3304|6283|7508|7052|2690
cell migration	Gene Ontology	GO:0016477	9	1177	0.00471086	0.0309274	5159|5592|5175|4680|91663|5420|6283|23586|2011
positive regulation of programmed cell death	Gene Ontology	GO:0043068	6	573	0.00480369	0.0314509	7052|5599|3482|1191|50650|10537
immune effector process	Gene Ontology	GO:0002252	7	763	0.00481176	0.0314509	3119|948|1191|3105|3106|256987|23586
regulation of protein modification process	Gene Ontology	GO:0031399	11	1641	0.00487692	0.0318069	5159|948|5175|5599|91663|54472|1191|3304|6283|2011|2690
catabolic process	Gene Ontology	GO:0009056	12	1889	0.00503113	0.0326741	90637|56999|11145|85329|2524|1191|10537|1203|6202|1291|7915|7837
ion transport	Gene Ontology	GO:0006811	10	1415	0.00504535	0.0326903	5159|286133|26959|79026|10008|256987|57190|7018|348932|6948
cellular localization	Gene Ontology	GO:0051641	14	2394	0.00509969	0.0329706	23673|948|5599|22885|91663|6281|54472|91828|23586|57190|6202|7127|7846|2011
regulation of signal transduction	Gene Ontology	GO:0009966	15	2663	0.00527094	0.0339303	5159|1191|79658|948|5175|10537|5599|91663|6283|91851|57190|50650|3304|7837|2690
signal transducer activity	Gene Ontology	GO:0004871	11	1662	0.00535128	0.034373	5159|948|3119|3117|3482|54472|5599|51267|79602|9318|2690
cellular homeostasis	Gene Ontology	GO:0019725	7	780	0.0054072	0.0345828	286133|948|7052|310|1203|57190|7018
peptide metabolic process	Gene Ontology	GO:0006518	7	781	0.00544388	0.0346755	9617|60559|4257|1191|1203|6202|7915
identical protein binding	Gene Ontology	GO:0042802	9	1210	0.00561334	0.0354439	7450|3482|6281|4257|3135|23586|79602|7915|2690
vasculature development	Gene Ontology	GO:0001944	6	593	0.00564801	0.0355873	5159|5175|55109|6443|7127|79602
regulation of cell communication	Gene Ontology	GO:0010646	16	2955	0.00575003	0.0360013	5159|1191|79658|948|5175|10537|5599|91663|6283|91851|57190|22941|50650|3304|7837|2690
divalent metal ion transport	Gene Ontology	GO:0070838	5	419	0.00582528	0.0363572	5159|79026|57190|10008|7018
chemical homeostasis	Gene Ontology	GO:0048878	8	1000	0.00587357	0.0365001	286133|948|7052|310|1203|57190|79602|7018
positive regulation of metabolic process	Gene Ontology	GO:0009893	16	2962	0.0058788	0.0365001	5159|90637|2299|1191|948|5175|23586|84441|22885|60313|54472|5599|3304|6283|2011|2690
immune response-activating signal transduction	Gene Ontology	GO:0002757	5	424	0.00611435	0.0378835	3117|23586|3304|948|3119
phosphorylation	Gene Ontology	GO:0016310	13	2190	0.00615079	0.0380301	5159|5592|158067|5175|5599|948|91663|54472|1191|8859|6283|2011|2690
positive regulation of cell death	Gene Ontology	GO:0010942	6	607	0.00630047	0.0387942	7052|5599|3482|1191|50650|10537
macromolecule localization	Gene Ontology	GO:0033036	15	2734	0.00666923	0.0407275	56999|23673|1191|7018|948|5599|91663|6281|54472|91828|23586|6202|7127|6283|22885
regulation of signaling	Gene Ontology	GO:0023051	16	3006	0.00674323	0.041011	5159|1191|79658|948|5175|10537|5599|91663|6283|91851|57190|22941|50650|3304|7837|2690
positive regulation of cell differentiation	Gene Ontology	GO:0045597	7	814	0.00676246	0.041044	56999|948|1191|91663|6281|3135|2011
regulation of developmental process	Gene Ontology	GO:0050793	13	2217	0.00678893	0.0411207	5159|56999|310|948|85329|1191|3106|55109|91663|6281|3135|2011|2690
regulation of cell death	Gene Ontology	GO:0010941	10	1480	0.00683701	0.0411709	5159|79658|10537|5599|155038|3482|1191|50650|3304|7052
positive regulation of transferase activity	Gene Ontology	GO:0051347	6	620	0.00695404	0.0417416	5159|1191|256987|6283|2011|2690
positive regulation of protein metabolic process	Gene Ontology	GO:0051247	10	1484	0.00696161	0.0417416	5159|90637|948|5175|5599|54472|1191|6283|2011|2690
establishment of protein localization	Gene Ontology	GO:0045184	12	1977	0.00713294	0.0425117	56999|23673|1191|7018|948|5599|91663|6281|6283|23586|6202|22885
cytoskeleton organization	Gene Ontology	GO:0007010	8	1036	0.00719653	0.0428049	112802|5159|5592|79658|22885|91663|6281|2011
positive regulation of cellular metabolic process	Gene Ontology	GO:0031325	15	2759	0.00722772	0.0429047	5159|90637|2299|1191|948|5175|84441|22885|60313|54472|23586|3304|6283|2011|2690
organic cyclic compound metabolic process	Gene Ontology	GO:1901360	26	5932	0.00729615	0.0432246	5159|2299|158067|84441|6948|3304|1191|79026|6283|91851|6202|128553|90338|26959|60313|23586|9318|93517|948|5599|22885|55109|55758|57604|7508|2690
kinase activity	Gene Ontology	GO:0016301	7	833	0.00762222	0.044448	5159|5592|158067|5599|3482|8859|2011
actin cytoskeleton	Gene Ontology	GO:0015629	5	450	0.00778206	0.0451147	23586|22885|2011|91663|79026
protein kinase activity	Gene Ontology	GO:0004672	6	636	0.0078244	0.0452719	5159|5592|5599|3482|8859|2011
positive regulation of cell communication	Gene Ontology	GO:0010647	10	1513	0.00791872	0.0457123	5159|948|5175|10537|5599|6283|1191|22941|3304|2690
positive regulation of signaling	Gene Ontology	GO:0023056	10	1518	0.00809356	0.0464677	5159|948|5175|10537|5599|6283|1191|22941|3304|2690
cell motility	Gene Ontology	GO:0048870	9	1288	0.00827962	0.0473531	5159|5592|5175|4680|91663|5420|6283|23586|2011
localization of cell	Gene Ontology	GO:0051674	9	1288	0.00827962	0.0473531	5159|5592|5175|4680|91663|5420|6283|23586|2011
positive regulation of protein kinase activity	Gene Ontology	GO:0045860	5	459	0.00842655	0.0478255	5159|1191|6283|2011|2690
secretion	Gene Ontology	GO:0046903	8	1066	0.00846193	0.0478702	5175|948|1191|7450|91828|6283|7018|7127
cell projection	Gene Ontology	GO:0042995	11	1772	0.00846661	0.0478702	158067|948|1191|348932|10008|5420|23586|26059|22941|22885|91663
regulation of cell activation	Gene Ontology	GO:0050865	5	463	0.00872454	0.0489562	3117|3135|5592|671|3119
heterocycle metabolic process	Gene Ontology	GO:0046483	25	5717	0.00885687	0.0496051	5159|2299|158067|84441|6948|3304|1191|79026|6283|91851|6202|128553|90338|26959|60313|23586|9318|948|5599|22885|55109|55758|57604|7508|2690
--------------------

## Sheet: liver
#Term	Database	ID	Input number	Background number	P-Value	Corrected P-Value	Input
cell part	Gene Ontology	GO:0044464	110	15776	9.21684e-34	1.79874e-30	213|210|100506658|760|59084|11309|10243|6441|474344|3554|696|2326|5624|2244|283|23600|6999|718|4337|80036|1956|127|1562|5618|1557|8876|1559|1528|3240|414|412|922|290|1826|337880|10537|3778|124583|6782|6822|91584|7363|7364|27147|2266|390439|2938|50865|1589|23541|10788|1645|10982|9962|338|6348|7018|3293|2203|1582|731|26137|2|189|653509|54677|635|91828|3105|60412|10249|9235|3172|10246|10840|10841|12…
cell	Gene Ontology	GO:0005623	110	15802	1.09346e-33	1.79874e-30	213|210|100506658|760|59084|11309|10243|6441|474344|3554|696|2326|5624|2244|283|23600|6999|718|4337|80036|1956|127|1562|5618|1557|8876|1559|1528|3240|414|412|922|290|1826|337880|10537|3778|124583|6782|6822|91584|7363|7364|27147|2266|390439|2938|50865|1589|23541|10788|1645|10982|9962|338|6348|7018|3293|2203|1582|731|26137|2|189|653509|54677|635|91828|3105|60412|10249|9235|3172|10246|10840|10841|12…
single-organism process	Gene Ontology	GO:0044699	101	12728	1.32918e-32	1.45767e-29	213|210|100506658|760|59084|11309|6441|83938|3554|2326|5624|2244|283|23600|6999|718|4337|5618|1956|127|1562|1553|1557|8876|1559|1528|1826|414|412|922|290|3240|10537|3778|124583|6291|6822|91584|7363|7364|2266|390439|2938|1589|23541|10788|1645|10982|9962|338|7018|3293|2203|1582|26137|2|189|653509|54677|635|91828|3105|60412|10249|10243|3172|10840|10841|12|4680|4837|63875|720|2690|883|29969|3158|8359…
single-organism metabolic process	Gene Ontology	GO:0044710	61	3962	1.34381e-29	1.10528e-26	883|9962|29969|338|635|7364|760|6822|83594|10840|51218|23600|3293|3172|2203|2326|1582|6348|210|7363|100506658|1645|53343|4337|2244|283|189|1528|1565|5288|23743|54677|6999|2938|718|1806|1553|1589|10249|127|10243|23541|3158|1562|93517|10841|5618|12|1557|8876|1559|2266|414|1956|412|350|1571|80781|1577|1576|2690
cytoplasm	Gene Ontology	GO:0005737	90	10469	5.89524e-29	3.87907e-26	213|210|100506658|760|127|9235|474344|2326|5624|2244|283|23600|6999|4337|5618|1956|6441|1755|1553|1557|1559|1528|3240|414|412|922|290|10537|124583|6782|7363|7364|27147|2266|6822|2938|50865|2203|23541|10788|1645|10982|9962|338|7018|3293|1589|1582|2|189|653509|54677|635|91828|3105|60412|10249|10243|3172|10840|10841|12|4837|63875|883|29969|3158|83594|53343|6348|3106|1562|1565|5288|23743|51218|350|39…
cytoplasmic part	Gene Ontology	GO:0044444	80	7901	7.13731e-29	3.91362e-26	883|51218|29969|5624|213|635|7364|760|6441|124583|83594|6348|7018|23600|53343|474344|6782|2326|10788|89876|1582|6414|3106|7363|100506658|1645|1562|2|27147|1553|210|4337|2244|1755|3293|1528|1565|5288|23743|54677|6999|2938|1806|2203|350|5618|91828|1589|60412|10249|127|6822|9235|3158|283|3428|653509|10841|3429|12|338|3119|1557|3117|2266|3240|4837|414|1559|63875|1956|10840|412|3105|189|1571|80781|157…
single-organism cellular process	Gene Ontology	GO:0044763	93	11494	1.75224e-28	8.23553e-26	213|210|100506658|760|59084|83938|3554|2326|5624|2244|283|23600|6999|718|4337|5618|1956|127|1755|1553|1557|8876|1559|2266|1826|414|412|922|290|3240|10537|3778|124583|6822|91584|7363|7364|1528|390439|2938|1589|6441|10788|1645|10982|9962|338|7018|3293|2203|1582|2|189|54677|635|91828|3105|60412|10249|10243|3172|10840|10841|12|4680|6291|63875|2690|883|29969|3158|83594|53343|6348|3106|1112|1562|1565|5…
cellular process	Gene Ontology	GO:0009987	101	14647	4.94823e-27	2.03496e-24	213|210|100506658|760|59084|6441|83938|3554|2326|5624|2244|283|23600|6999|718|4337|1553|1956|127|1562|5618|1557|8876|1559|1528|1826|414|412|922|290|3240|10537|3778|124583|6822|91584|7363|7364|2266|390439|2938|1589|23541|10788|1645|80036|10982|9962|338|7018|3293|2203|1582|731|26137|2|189|653509|54677|635|91828|3105|60412|10249|10243|3172|10246|10840|10841|12|4680|6291|63875|720|2690|883|29969|3158…
small molecule metabolic process	Gene Ontology	GO:0044281	43	1910	3.81553e-26	1.39479e-23	883|338|635|7364|760|6822|83594|23600|3293|2203|2326|1582|3172|7363|100506658|53343|4337|1562|189|1528|1565|10840|23743|54677|6999|718|1806|1589|127|10243|23541|3158|1645|10841|1553|1557|8876|1559|10249|9962|1571|1576|2690
extracellular region	Gene Ontology	GO:0005576	59	4424	3.32185e-25	1.00922e-22	118471|1826|213|635|350|59084|140683|124583|6348|7018|338|2203|696|210|6414|3106|5624|7364|731|2|6782|2244|1755|1528|760|1645|23743|3778|53343|2938|718|50865|10249|3075|6441|9235|23541|10788|283|653509|10841|5618|12|3554|4680|8876|2266|3240|6291|414|1956|10840|720|3105|922|80781|7508|290|2690
extracellular region part	Gene Ontology	GO:0044421	55	3743	3.37428e-25	1.00922e-22	213|635|350|3778|140683|124583|6348|7018|338|2203|696|210|6414|3106|5624|7364|731|2|6782|2244|1755|1528|760|1645|23743|53343|2938|718|50865|10249|3075|6441|9235|23541|10788|283|653509|10841|12|3554|4680|8876|2266|3240|6291|414|1956|10840|720|3105|922|80781|7508|290|2690
metabolic process	Gene Ontology	GO:0008152	86	10642	7.54218e-25	2.06781e-22	213|210|100506658|760|59084|127|2326|5624|2244|283|23600|6999|718|4337|5618|1956|6441|1755|1553|1557|8876|1559|1528|1826|414|412|290|3240|10537|124583|7363|7364|2266|6822|2938|1589|23541|3158|1645|9962|338|6348|3293|2203|1582|731|26137|2|189|653509|54677|635|10249|3075|10243|3172|10246|10840|10841|12|4837|63875|720|2690|883|29969|83594|53343|6414|1112|1562|1565|5288|23743|51218|64798|1806|3429|34…
intracellular	Gene Ontology	GO:0005622	96	13775	1.06087e-24	2.68483e-22	213|210|100506658|760|6441|10243|474344|3554|2326|5624|2244|283|23600|6999|4337|5618|1956|127|1755|1553|1557|1559|1528|3240|414|412|922|290|337880|10537|124583|6782|7363|7364|27147|2266|6822|2938|50865|2203|23541|10788|1645|10982|9962|338|7018|3293|1589|1582|26137|2|189|653509|54677|635|91828|3105|60412|10249|9235|3172|10840|10841|12|4837|63875|2690|883|29969|3158|83594|53343|6348|3106|1112|1562|…
intracellular part	Gene Ontology	GO:0044424	94	13428	7.30834e-24	1.71746e-21	213|210|100506658|760|127|10243|474344|3554|2326|5624|2244|283|23600|6999|4337|5618|1956|6441|1755|1553|1557|1559|1528|3240|414|412|922|290|337880|10537|124583|6782|7363|7364|27147|2266|6822|2938|50865|2203|23541|10788|1645|10982|9962|338|7018|3293|1589|1582|26137|2|189|653509|54677|635|91828|3105|60412|10249|9235|3172|10840|10841|12|4837|63875|883|29969|3158|83594|53343|6348|3106|1112|1562|1565|…
organic acid metabolic process	Gene Ontology	GO:0006082	31	929	2.03978e-23	4.47393e-21	883|7364|6822|23600|635|2203|2326|1582|7363|100506658|1562|189|1528|1565|10840|23743|54677|6999|718|1806|10249|3172|1645|10841|1553|1557|8876|1559|9962|1571|2690
response to stimulus	Gene Ontology	GO:0050896	74	8081	4.55478e-23	9.36577e-21	9962|29969|5624|213|210|10537|1589|760|3778|140683|124583|6348|2266|4837|7018|3119|2326|1826|338|3172|2203|5618|10788|91584|6414|3106|7363|1645|731|1562|2|1553|2244|1755|189|1528|1565|5288|390439|283|54677|412|718|350|80036|64798|10249|3075|6441|9235|3158|922|3428|1112|3554|3429|12|1557|4680|8876|3117|1577|3240|6291|10982|1559|1956|720|3105|1571|80781|7508|1576|2690
membrane-bounded vesicle	Gene Ontology	GO:0031988	51	3520	7.89125e-23	1.52719e-20	213|635|7364|350|3778|140683|124583|10840|7018|338|2203|210|6414|3106|100506658|731|2|6782|2244|1755|1528|760|1645|23743|53343|2938|718|50865|10249|3075|6441|23541|10788|283|653509|10841|12|3119|8876|3117|2266|3240|6291|414|1956|720|3105|922|80781|7508|290
vesicle	Gene Ontology	GO:0031982	51	3652	3.99585e-22	7.30352e-20	213|635|7364|350|3778|140683|124583|10840|7018|338|2203|210|6414|3106|100506658|731|2|6782|2244|1755|1528|760|1645|23743|53343|2938|718|50865|10249|3075|6441|23541|10788|283|653509|10841|12|3119|8876|3117|2266|3240|6291|414|1956|720|3105|922|80781|7508|290
response to chemical	Gene Ontology	GO:0042221	53	4014	5.18486e-22	8.97799e-20	1826|213|210|10537|1589|760|3778|2266|4837|7018|338|3172|2203|2326|91584|3105|3106|7363|1553|2244|283|189|1528|1565|5288|390439|54677|718|350|5618|10249|6441|3158|1562|1645|3554|3429|3119|1557|8876|3117|1577|3240|6291|1559|1956|412|6348|1571|80781|7508|1576|2690
extracellular exosome	Gene Ontology	GO:0070062	45	2738	5.46879e-22	8.99616e-20	213|635|350|3778|140683|124583|7018|338|2203|210|6414|3106|7364|731|2|6782|2244|1755|1528|760|10840|23743|53343|2938|718|50865|10249|3075|23541|10788|283|1645|10841|12|8876|2266|3240|6291|414|720|3105|922|80781|7508|290
extracellular vesicle	Gene Ontology	GO:1903561	45	2751	6.58743e-22	9.99283e-20	213|635|350|3778|140683|124583|7018|338|2203|210|6414|3106|7364|731|2|6782|2244|1755|1528|760|10840|23743|53343|2938|718|50865|10249|3075|23541|10788|283|1645|10841|12|8876|2266|3240|6291|414|720|3105|922|80781|7508|290
extracellular organelle	Gene Ontology	GO:0043230	45	2752	6.68214e-22	9.99283e-20	213|635|350|3778|140683|124583|7018|338|2203|210|6414|3106|7364|731|2|6782|2244|1755|1528|760|10840|23743|53343|2938|718|50865|10249|3075|23541|10788|283|1645|10841|12|8876|2266|3240|6291|414|720|3105|922|80781|7508|290
binding	Gene Ontology	GO:0005488	93	13918	8.90929e-22	1.27442e-19	213|210|760|59084|9235|127|474344|3554|2326|5624|2244|283|23600|6999|718|4337|5618|1956|6441|1755|1553|1557|1559|1528|1826|414|412|290|3240|10537|3778|124583|6782|100506658|2266|6822|50865|2203|23541|10788|1645|10982|51218|118471|338|7018|1589|1582|731|26137|2|189|653509|54677|635|91828|3105|60412|10249|3075|10243|3172|10841|12|4680|63875|720|2690|883|29969|140683|83594|6348|3106|1112|1562|1565|5…
organelle	Gene Ontology	GO:0043226	89	12692	1.25324e-21	1.71799e-19	213|210|100506658|760|3554|2326|5624|2244|283|23600|718|4337|5618|1956|6441|1562|1553|1557|8876|1559|1528|3240|414|412|922|290|337880|10537|3778|124583|6782|7363|7364|27147|2266|2938|50865|1589|23541|10788|1645|10982|51218|338|7018|3293|2203|1582|731|26137|2|189|653509|54677|635|3105|10249|3075|10243|3172|10840|10841|12|6291|63875|720|883|29969|3158|140683|83594|53343|6414|3106|1112|1755|1565|237…
membrane-bounded organelle	Gene Ontology	GO:0043227	85	11806	8.79141e-21	1.15695e-18	883|51218|29969|5624|213|635|10537|7364|350|3778|140683|124583|83594|10840|2266|1112|7018|760|23600|1553|3293|731|3172|2203|2326|10788|89876|1582|6414|3106|7363|100506658|412|3554|26137|2|6782|210|2244|1755|189|1528|1565|1645|23743|283|54677|53343|2938|718|4337|50865|5618|1562|1589|10249|3075|6441|23541|3158|922|3428|653509|10841|3429|12|338|3119|1557|8876|3117|1577|3240|6291|414|1559|63875|1956|…
cellular metabolic process	Gene Ontology	GO:0044237	78	9846	9.32363e-21	1.1798e-18	883|9962|29969|5624|338|635|10537|7364|760|6441|124583|83594|10840|2266|23600|53343|3172|2203|2326|189|1582|6414|210|7363|100506658|1645|412|1562|2|1553|4337|2244|1755|3293|1528|1565|5288|23743|26137|54677|6999|2938|718|1806|350|5618|64798|1589|10249|1112|127|6822|10243|23541|3158|10246|283|3428|653509|10841|3429|12|1557|8876|1559|1577|3240|414|63875|1956|720|6348|1571|1826|7508|1576|290|2690
lipid metabolic process	Gene Ontology	GO:0006629	32	1275	1.40576e-20	1.71294e-18	338|23600|3293|1589|1582|3172|7364|1645|283|1565|5288|6822|54677|718|1553|1956|127|23541|3158|1562|93517|5618|12|1557|1559|414|412|350|1571|1577|1576|2690
extracellular space	Gene Ontology	GO:0005615	32	1330	4.73575e-20	5.56451e-18	213|210|760|7018|338|3554|696|6414|5624|731|2|2244|1755|2266|718|350|1956|3075|6441|9235|283|653509|12|4680|3240|6291|720|6348|922|80781|290|2690
organic substance metabolic process	Gene Ontology	GO:0071704	78	10277	1.45281e-19	1.64818e-17	883|9962|29969|5624|213|635|10537|7364|6441|124583|83594|10840|2266|1112|23600|53343|3172|2203|2326|189|1582|6348|210|7363|100506658|1645|412|731|26137|2|5288|1553|4337|2244|1755|3293|1528|1565|653509|23743|54677|6999|2938|718|1806|1562|5618|64798|1589|10249|3075|127|6822|10243|23541|3158|283|3428|93517|10841|3429|12|338|1557|8876|1559|7508|414|63875|1956|720|350|1571|80781|1577|1576|290|2690
steroid metabolic process	Gene Ontology	GO:0008202	18	258	3.75228e-19	4.115e-17	93517|1645|5618|1589|23600|338|1557|1582|6822|1565|1559|412|23541|1571|3158|1577|1576|3293
carboxylic acid metabolic process	Gene Ontology	GO:0019752	26	841	7.18829e-19	7.62887e-17	883|6822|23600|2203|1582|7363|7364|1562|189|1528|1565|23743|54677|635|718|10249|3172|1645|10841|1553|1557|8876|1559|9962|1571|2690
oxoacid metabolic process	Gene Ontology	GO:0043436	26	846	8.27061e-19	8.50322e-17	883|6822|23600|2203|1582|7363|7364|1562|189|1528|1565|23743|54677|635|718|10249|3172|1645|10841|1553|1557|8876|1559|9962|1571|2690
endoplasmic reticulum part	Gene Ontology	GO:0044432	29	1158	1.27855e-18	1.27468e-16	5624|338|124583|3293|1589|2326|1582|3105|3106|7363|7364|1562|1528|1565|1956|6441|653509|10841|1553|1557|3119|3117|414|1559|412|1571|80781|1577|1576
catalytic activity	Gene Ontology	GO:0003824	57	5590	1.42117e-18	1.37519e-16	883|51218|189|5624|635|7364|760|59084|124583|83594|10840|23600|53343|3172|2203|2326|1582|6348|210|7363|100506658|1645|412|4337|283|3293|1528|1565|5288|23743|54677|6999|2938|718|1806|391365|10249|127|6822|10243|3158|1562|93517|10841|1553|1589|1557|8876|1559|4837|414|1956|720|1571|1577|1576|290
xenobiotic metabolic process	Gene Ontology	GO:0006805	13	93	9.54917e-18	8.72688e-16	1645|1553|2326|1557|1559|7363|1565|10249|1562|1571|3172|1577|1576
cellular response to xenobiotic stimulus	Gene Ontology	GO:0071466	13	98	1.78001e-17	1.58276e-15	1645|1553|2326|1557|1559|7363|1565|10249|1562|1571|3172|1577|1576
monocarboxylic acid metabolic process	Gene Ontology	GO:0032787	21	536	2.49787e-17	2.16263e-15	1645|10841|1553|2203|54677|1557|718|1582|3172|8876|7364|6822|1562|1559|10249|7363|23600|1571|189|1565|2690
endoplasmic reticulum membrane	Gene Ontology	GO:0005789	26	981	2.69479e-17	2.2733e-15	338|124583|3293|1589|2326|1582|3105|3106|7363|7364|1562|1528|1565|1956|6441|653509|10841|1553|1557|3119|3117|1559|412|1571|1577|1576
oxygen binding	Gene Ontology	GO:0019825	11	50	3.83534e-17	3.07763e-15	1553|213|1557|1582|1562|1565|1559|1571|1577|1576|6999
nuclear outer membrane-endoplasmic reticulum membrane network	Gene Ontology	GO:0042175	26	1002	4.42122e-17	3.46329e-15	338|124583|3293|1589|2326|1582|3105|3106|7363|7364|1562|1528|1565|1956|6441|653509|10841|1553|1557|3119|3117|1559|412|1571|1577|1576
response to xenobiotic stimulus	Gene Ontology	GO:0009410	13	106	4.53809e-17	3.47217e-15	1645|1553|2326|1557|1559|7363|1565|10249|1562|1571|3172|1577|1576
endoplasmic reticulum	Gene Ontology	GO:0005783	31	1623	1.14656e-16	8.38266e-15	5624|213|124583|3293|6782|2326|1582|3105|3106|7363|7364|1562|1528|1565|1589|6441|653509|10841|1553|338|3119|1557|3117|414|1559|1956|412|1571|80781|1577|1576
heme binding	Gene Ontology	GO:0020037	13	124	2.97047e-16	2.12454e-14	1553|1589|6999|1557|1582|1577|50865|1565|1559|1562|1571|1528|1576
monooxygenase activity	Gene Ontology	GO:0004497	12	93	4.36013e-16	3.05209e-14	1645|1553|1589|2326|1557|1582|1562|1565|1559|1571|1577|1576
tetrapyrrole binding	Gene Ontology	GO:0046906	13	133	6.89565e-16	4.72639e-14	1553|1589|6999|1557|1582|1577|50865|1565|1559|1562|1571|1528|1576
response to stress	Gene Ontology	GO:0006950	43	3660	1.28163e-15	8.43313e-14	29969|213|210|10537|760|3778|140683|6348|3172|3554|2326|3105|3106|5624|731|2|2244|1755|2266|283|9962|718|350|1956|3075|6441|9235|3158|922|3428|3429|12|3119|8876|3117|3240|6291|720|6414|1571|80781|7508|1112
vesicle lumen	Gene Ontology	GO:0031983	12	106	1.84553e-15	1.19055e-13	12|213|6414|3240|1956|7018|350|2244|2|2266|290|338
cofactor metabolic process	Gene Ontology	GO:0051186	17	368	2.57268e-15	1.62771e-13	1645|10841|23743|2203|54677|6999|210|8876|4337|100506658|83594|10840|10249|127|10243|3172|2326
steroid hydroxylase activity	Gene Ontology	GO:0008395	9	31	3.48641e-15	2.16421e-13	1553|1589|1557|1582|1562|1565|1559|1571|1576
blood microparticle	Gene Ontology	GO:0072562	12	113	3.74488e-15	2.2816e-13	12|213|718|3240|731|7018|2|3075|720|2244|922|2266
organonitrogen compound metabolic process	Gene Ontology	GO:1901564	33	2144	4.436e-15	2.65354e-13	883|635|6822|83594|53343|2203|2326|210|5624|100506658|283|189|1565|23743|54677|6999|2938|1806|4337|10249|10243|3172|10840|10841|1559|414|63875|1956|412|1577|1576|290|2690
membrane part	Gene Ontology	GO:0044425	56	6452	4.84734e-15	2.84781e-13	338|5288|7364|760|59084|124583|11309|7018|3119|3293|1589|696|5618|91584|1582|3105|3106|7363|100506658|731|1553|2244|1755|1528|1565|653509|390439|3778|9962|388595|3429|60412|1956|6441|10243|23541|10246|1562|2326|93517|10841|80036|3554|1557|4680|8876|3117|2266|1826|1559|412|1571|1577|1576|290|2690
intracellular organelle part	Gene Ontology	GO:0044446	62	7986	1.07253e-14	6.19056e-13	883|51218|29969|5624|337880|10537|1589|213|124583|83594|2266|7018|23600|3293|3172|10788|2326|1582|3105|3106|7363|7364|26137|2|1553|2244|1755|189|1528|1565|54677|53343|350|5618|1562|10249|6441|3158|283|3428|653509|10841|3429|12|338|3119|1557|3117|1577|3240|10982|414|1559|63875|1956|412|6414|1571|80781|7508|1576|290
membrane	Gene Ontology	GO:0016020	65	8805	1.59048e-14	9.02184e-13	9962|338|5288|7364|760|59084|124583|11309|2266|7018|10243|3119|3293|1589|696|5618|91584|1582|3105|3106|7363|100506658|731|1553|2244|1755|1528|1565|653509|390439|3778|412|718|388595|3429|1562|60412|1956|6441|9235|23541|3158|10246|922|2326|93517|10841|80036|3428|3554|1557|4680|8876|3117|1577|1826|1559|63875|720|350|1571|7508|1576|290|2690
endomembrane system	Gene Ontology	GO:0012505	42	3788	2.27188e-14	1.26686e-12	29969|5624|213|1589|124583|7018|3293|6782|2326|1582|3105|3106|7363|7364|2|1553|2244|1755|1528|1565|350|5618|1956|6441|1562|653509|10841|3429|12|338|3119|1557|3117|2266|414|1559|412|6414|1571|80781|1577|1576
cellular response to chemical stimulus	Gene Ontology	GO:0070887	35	2587	2.34343e-14	1.28498e-12	338|210|1589|760|7018|3172|2203|2326|91584|3105|3106|7363|1553|2244|1562|1565|5618|10249|6441|3158|1645|3554|3429|1557|3119|8876|3117|6291|1559|1956|6348|1571|1577|1576|2690
organelle part	Gene Ontology	GO:0044422	62	8165	3.08154e-14	1.66201e-12	883|51218|29969|5624|337880|10537|1589|213|124583|83594|2266|7018|23600|3293|3172|10788|2326|1582|3105|3106|7363|7364|26137|2|1553|2244|1755|189|1528|1565|54677|53343|350|5618|1562|10249|6441|3158|283|3428|653509|10841|3429|12|338|3119|1557|3117|1577|3240|10982|414|1559|63875|1956|412|6414|1571|80781|7508|1576|290
primary metabolic process	Gene Ontology	GO:0044238	68	9824	5.65541e-14	3.00102e-12	883|9962|29969|5624|338|635|10537|7364|6441|6822|83594|1112|23600|3293|2203|2326|1582|6348|3172|412|100506658|1645|731|26137|2|5288|1553|4337|2244|1755|189|2266|1565|653509|23743|54677|53343|718|1806|1562|5618|64798|1589|10249|3075|127|10243|23541|3158|283|3428|93517|10841|3429|12|1557|1559|7508|414|63875|1956|720|350|1571|1577|1576|290|2690
oxidoreductase activity	Gene Ontology	GO:0016491	20	710	6.23231e-14	3.25465e-12	93517|1806|1553|1589|6999|1557|1582|1577|1562|1645|1565|1559|10840|51218|127|1571|2326|1528|1576|3293
oxidoreductase activity, acting on paired donors, with incorporation or reduction of molecular oxygen	Gene Ontology	GO:0016705	12	151	9.3828e-14	4.82334e-12	1645|1553|1589|2326|1557|1582|1562|1565|1559|1571|1577|1576
oxidation-reduction process	Gene Ontology	GO:0055114	22	947	1.33624e-13	6.76341e-12	10840|23600|3293|1589|2326|1582|1562|1528|1565|1645|54677|6999|127|93517|1806|1553|1557|1559|51218|1571|1577|1576
cellular lipid metabolic process	Gene Ontology	GO:0044255	22	995	3.49364e-13	1.74153e-11	338|23600|3158|283|1565|5288|54677|718|1956|127|3172|1562|1645|1553|1557|1559|414|412|350|1571|1576|2690
intracellular organelle	Gene Ontology	GO:0043229	73	11680	5.46982e-13	2.64643e-11	883|51218|29969|5624|337880|210|10537|7364|213|124583|83594|2266|7018|23600|3293|3172|6782|2326|10788|89876|1582|6414|3106|7363|100506658|3554|26137|2|27147|1553|2244|1755|189|1528|1565|10840|54677|53343|4337|350|5618|1562|1589|10249|1112|6441|10243|23541|3158|283|3428|653509|10841|3429|12|338|3119|1557|3117|1577|3240|10982|414|1559|63875|1956|412|3105|1571|80781|7508|1576|290
coenzyme metabolic process	Gene Ontology	GO:0006732	14	300	7.42051e-13	3.52414e-11	10840|10841|23743|2203|54677|6999|8876|4337|100506658|83594|10249|10243|3172|2326
defense response	Gene Ontology	GO:0006952	26	1535	7.49816e-13	3.52414e-11	10537|140683|3554|3105|3106|5624|731|2|2244|283|718|3428|3075|6441|9235|1755|3429|12|3119|8876|3117|3240|6291|720|6348|922
single-organism biosynthetic process	Gene Ontology	GO:0044711	24	1295	1.03162e-12	4.78033e-11	883|338|210|3293|2203|1582|3172|283|189|5288|23743|23600|635|2938|718|4337|1589|10243|23541|3158|93517|1806|5618|1576
catabolic process	Gene Ontology	GO:0009056	28	1889	1.96605e-12	8.98376e-11	883|338|635|10537|83594|23600|53343|2203|7363|189|1565|6822|54677|6999|1806|1956|127|10840|10841|1557|1559|3240|412|350|80781|1577|1576|290
cytoplasmic membrane-bounded vesicle lumen	Gene Ontology	GO:0060205	10	104	1.99623e-12	8.99669e-11	12|213|6414|3240|2|7018|350|2244|2266|338
cellular response to stimulus	Gene Ontology	GO:0051716	53	6741	2.35684e-12	1.04784e-10	29969|213|210|10537|1589|760|124583|7018|3119|338|3172|2203|2326|10788|91584|3105|3106|7363|2|1553|2244|1755|189|2266|1565|5288|390439|718|5618|64798|10249|1112|6441|3158|1562|1645|3554|3429|3428|1557|4680|8876|3117|1577|6291|10982|1559|1956|6348|1571|7508|1576|2690
iron ion binding	Gene Ontology	GO:0005506	11	156	3.55312e-12	1.55863e-10	1553|1589|1557|1582|1562|1565|1559|7018|1571|1577|1576
intracellular membrane-bounded organelle	Gene Ontology	GO:0043231	68	10674	3.74732e-12	1.6222e-10	883|51218|29969|5624|213|210|10537|7364|124583|83594|2266|7018|23600|3293|3172|6782|2326|89876|1582|6414|3106|7363|100506658|3554|26137|2|1553|2244|1755|189|1528|1565|10840|54677|53343|4337|350|5618|1562|1589|10249|1112|6441|23541|3158|283|3428|653509|10841|3429|12|338|3119|1557|3117|1577|3240|414|1559|63875|1956|412|3105|1571|80781|7508|1576|290
ion binding	Gene Ontology	GO:0043167	41	4228	4.06098e-12	1.73515e-10	883|51218|213|210|760|59084|124583|83594|7018|635|2203|1582|5624|26137|283|189|1528|1565|23743|3778|6999|4337|1553|1589|127|10243|3172|1562|1645|1806|5618|1557|1559|2266|414|412|1571|80781|1577|1576|290
response to external stimulus	Gene Ontology	GO:0009605	29	2106	4.31028e-12	1.81805e-10	1826|213|210|140683|6348|338|3554|2326|3105|91584|5624|731|2|2244|1755|2266|5288|718|3075|6441|3158|283|80036|3428|3240|6291|720|350|7508
response to inorganic substance	Gene Ontology	GO:0010035	16	505	4.48326e-12	1.86708e-10	2203|213|3158|718|2266|210|3240|3554|3778|7018|2244|1571|80781|1528|760|338
protein binding	Gene Ontology	GO:0005515	67	10621	1.05839e-11	4.35261e-10	883|118471|29969|1826|213|210|10537|760|3778|140683|91828|83594|1112|7018|10243|23600|338|3172|6782|3105|3106|5624|100506658|731|2|2244|1755|189|1528|1645|6822|54677|6999|718|2203|1806|350|5618|64798|60412|10249|3075|6441|9235|10788|283|3428|653509|10841|3429|12|3554|4680|1557|2266|3240|10982|89876|63875|1956|720|6348|1571|80781|7508|1576|2690
steroid biosynthetic process	Gene Ontology	GO:0006694	10	138	2.74448e-11	1.11473e-09	93517|5618|1589|23600|338|1582|23541|3158|1576|3293
drug metabolic process	Gene Ontology	GO:0017144	7	33	3.02721e-11	1.20902e-09	2326|1557|1559|1565|1571|1577|1576
endocytic vesicle	Gene Ontology	GO:0030139	12	254	3.0501e-11	1.20902e-09	653509|338|3119|3117|3105|3106|3240|100506658|1956|7018|6441|1755
localization	Gene Ontology	GO:0051179	46	5581	3.1626e-11	1.23868e-09	29969|1826|213|760|3778|91828|11309|7018|338|5618|6414|91584|5624|2|27147|2244|1755|189|1528|1645|54677|9962|718|350|3429|60412|1956|6441|10243|23541|3172|10246|283|653509|80036|12|4680|2266|3240|6291|720|6348|922|80781|290|2690
arachidonic acid monooxygenase activity	Gene Ontology	GO:0008391	6	15	3.25121e-11	1.24378e-09	1553|1557|1559|1562|1571|1565
arachidonic acid epoxygenase activity	Gene Ontology	GO:0008392	6	15	3.25121e-11	1.24378e-09	1553|1557|1559|1562|1571|1565
single-organism transport	Gene Ontology	GO:0044765	31	2654	4.20323e-11	1.5895e-09	29969|213|760|3778|91828|11309|7018|338|6414|6348|2|2244|283|189|2266|1645|54677|9962|718|60412|1956|6441|3172|653509|5618|12|1528|720|350|290|2690
innate immune response	Gene Ontology	GO:0045087	18	798	4.40281e-11	1.64605e-09	3429|3428|3119|718|3117|3105|3106|8876|6441|731|2|3075|720|6348|2244|1755|10537|283
organonitrogen compound catabolic process	Gene Ontology	GO:1901565	13	334	4.46777e-11	1.65157e-09	883|10841|53343|635|1806|83594|1565|10840|189|1577|1576|290|6999
single-organism localization	Gene Ontology	GO:1902578	32	2861	5.65041e-11	2.06554e-09	29969|213|760|3778|91828|11309|7018|338|6414|6348|2|2244|283|189|2266|1645|54677|9962|718|60412|1956|6441|10243|3172|653509|5618|12|1528|720|350|290|2690
cytoplasmic vesicle part	Gene Ontology	GO:0044433	16	604	5.90466e-11	2.13476e-09	12|213|3119|350|3117|6414|3106|3240|1956|7018|3105|2244|2|1755|2266|338
oxidoreductase activity, acting on paired donors, with incorporation or reduction of molecular oxygen, NAD(P)H as one donor, and incorporation of one atom of oxygen	Gene Ontology	GO:0016709	7	38	7.27837e-11	2.60281e-09	1645|2326|1557|1582|1559|1571|1576
metal ion binding	Gene Ontology	GO:0046872	38	4039	8.16998e-11	2.89024e-09	51218|213|210|760|59084|124583|83594|7018|635|2203|1582|5624|26137|283|1528|1565|23743|3778|6999|4337|1553|1589|127|10243|3172|1562|1806|5618|1557|1559|2266|414|412|1571|80781|1577|1576|290
transport	Gene Ontology	GO:0006810	40	4456	8.80587e-11	3.08205e-09	29969|213|760|3778|91828|11309|7018|338|5618|6414|5624|2|27147|2244|1755|189|2266|1645|54677|9962|718|350|80036|60412|1956|6441|23541|3172|10246|283|653509|3429|12|1528|3240|720|6348|922|290|2690
monoterpenoid metabolic process	Gene Ontology	GO:0016098	5	6	9.89886e-11	3.42813e-09	1559|1571|1576|1557|1565
cation binding	Gene Ontology	GO:0043169	38	4078	1.07911e-10	3.69818e-09	51218|213|210|760|59084|124583|83594|7018|635|2203|1582|5624|26137|283|1528|1565|23743|3778|6999|4337|1553|1589|127|10243|3172|1562|1806|5618|1557|1559|2266|414|412|1571|80781|1577|1576|290
establishment of localization	Gene Ontology	GO:0051234	40	4583	2.04946e-10	6.95126e-09	29969|213|760|3778|91828|11309|7018|338|5618|6414|5624|2|27147|2244|1755|189|2266|1645|54677|9962|718|350|80036|60412|1956|6441|23541|3172|10246|283|653509|3429|12|1528|3240|720|6348|922|290|2690
small molecule biosynthetic process	Gene Ontology	GO:0044283	14	467	2.13251e-10	7.15913e-09	883|1806|23743|2203|23600|338|635|1582|189|3172|23541|3158|1576|3293
protein activation cascade	Gene Ontology	GO:0072376	8	79	2.37687e-10	7.81991e-09	718|731|2|3075|720|350|2244|2266
cytoplasmic, membrane-bounded vesicle	Gene Ontology	GO:0016023	20	1159	3.40798e-10	1.11013e-08	653509|12|213|3119|350|3117|6414|3106|3240|100506658|6441|1956|7018|3105|2244|2|1755|2266|283|338
isoprenoid metabolic process	Gene Ontology	GO:0006720	9	128	3.589e-10	1.15763e-08	1645|338|1557|1559|1565|127|1571|3158|1576
secretory granule lumen	Gene Ontology	GO:0034774	8	85	4.08147e-10	1.30369e-08	12|213|6414|2|7018|350|2244|2266
single-organism catabolic process	Gene Ontology	GO:0044712	17	805	4.26825e-10	1.35024e-08	883|10841|6822|2203|54677|6999|1806|189|127|338|83594|412|350|23600|80781|1576|53343
oxidoreductase activity, acting on paired donors, with incorporation or reduction of molecular oxygen, reduced flavin or flavoprotein as one donor, and incorporation of one atom of oxygen	Gene Ontology	GO:0016712	6	26	5.28617e-10	1.65633e-08	1553|1565|1576|1562|1577|1571
immune system process	Gene Ontology	GO:0002376	28	2414	5.35264e-10	1.66134e-08	338|10537|760|3554|3105|3106|5624|731|2|2244|283|51218|718|5618|3075|6441|9235|1755|3429|3428|4680|3119|8876|3117|3240|720|6348|922
response to organic substance	Gene Ontology	GO:0010033	30	2810	7.8695e-10	2.41969e-08	213|210|10537|760|3778|6348|338|3172|1589|2326|3105|3106|2244|283|189|54677|718|5618|1956|3158|1645|3554|3429|3119|3117|4837|412|350|1571|2690
organic cyclic compound metabolic process	Gene Ontology	GO:1901360	45	5932	8.9171e-10	2.71641e-08	883|9962|29969|338|210|83594|10840|23600|3293|2203|2326|1582|6348|3172|100506658|26137|1112|1553|53343|283|1565|1645|6822|54677|6999|1806|4337|5618|1589|10243|23541|3158|93517|10841|3429|3428|1557|1559|7508|1956|412|1571|1577|1576|2690
cellular catabolic process	Gene Ontology	GO:0044248	22	1513	9.40279e-10	2.83809e-08	883|338|10537|83594|23600|635|53343|189|1565|6822|54677|6999|1806|10840|10841|1557|1559|3240|350|1577|1576|290
acute inflammatory response	Gene Ontology	GO:0002526	9	144	9.59107e-10	2.8686e-08	12|8876|3240|6291|731|2|3075|720|718
vesicle-mediated transport	Gene Ontology	GO:0016192	21	1382	1.1076e-09	3.28288e-08	5624|12|338|213|718|6414|350|3240|91828|60412|2|27147|6441|720|6348|2244|1755|7018|2266|922|2690
cytoplasmic vesicle	Gene Ontology	GO:0031410	20	1258	1.36231e-09	4.00179e-08	653509|12|213|3119|350|3117|6414|3106|3240|100506658|6441|1956|7018|3105|2244|2|1755|2266|283|338
intracellular vesicle	Gene Ontology	GO:0097708	20	1260	1.39913e-09	4.07356e-08	653509|12|213|3119|350|3117|6414|3106|3240|100506658|6441|1956|7018|3105|2244|2|1755|2266|283|338
drug catabolic process	Gene Ontology	GO:0042737	5	13	1.8054e-09	5.21033e-08	1559|1577|1576|1557|1565
platelet degranulation	Gene Ontology	GO:0002576	8	106	2.09385e-09	5.99022e-08	12|213|6414|2|7018|350|2244|2266
terpenoid metabolic process	Gene Ontology	GO:0006721	8	107	2.24483e-09	6.31239e-08	1645|338|1557|1559|1565|127|1571|1576
biological regulation	Gene Ontology	GO:0065007	64	11110	2.94165e-09	8.20173e-08	51218|29969|5624|213|635|10537|1589|760|3778|124583|1112|7018|6441|3293|3172|2203|91584|3105|3106|7363|7364|731|26137|2|27147|2244|1755|189|2266|1565|5288|390439|412|718|350|5618|64798|60412|1956|3075|127|23541|10788|283|3428|1645|3554|3429|12|338|3119|4680|8876|3117|3240|10982|1826|720|6348|80781|7508|1576|290|2690
protein processing	Gene Ontology	GO:0016485	10	232	3.35362e-09	9.27177e-08	3428|718|5624|731|2|3075|720|350|2244|2266
response to oxygen-containing compound	Gene Ontology	GO:1901700	21	1474	3.39854e-09	9.31765e-08	1645|3554|5618|3158|338|210|718|6348|3172|3240|2326|1589|1956|3778|412|350|189|1571|80781|760|2690
organic substance catabolic process	Gene Ontology	GO:1901575	23	1789	3.73442e-09	1.01539e-07	883|338|10537|83594|23600|635|2203|53343|189|1565|6822|54677|6999|1806|1956|127|10840|10841|412|350|1577|1576|290
lipid biosynthetic process	Gene Ontology	GO:0008610	14	593	4.22025e-09	1.13808e-07	93517|5288|5618|1589|23600|338|718|1582|3172|23541|283|3158|1576|3293
humoral immune response	Gene Ontology	GO:0006959	9	178	5.60734e-09	1.49985e-07	3119|718|731|2|3075|720|2244|1755|283
transition metal ion binding	Gene Ontology	GO:0046914	20	1383	6.59187e-09	1.74897e-07	23743|1589|213|1557|283|1582|210|1562|1553|1565|1559|7018|127|760|1571|3172|1577|1576|290|635
epoxygenase P450 pathway	Gene Ontology	GO:0019373	5	18	7.00634e-09	1.84407e-07	1559|1571|1553|1557|1562
protein maturation	Gene Ontology	GO:0051604	10	257	8.57437e-09	2.23886e-07	3428|718|5624|731|2|3075|720|350|2244|2266
alpha-amino acid metabolic process	Gene Ontology	GO:1901605	9	188	8.83002e-09	2.28746e-07	883|10841|23743|6999|635|100506658|10249|189|2690
response to metal ion	Gene Ontology	GO:0010038	11	338	8.95451e-09	2.30159e-07	2203|213|210|718|2266|760|3778|7018|2244|3158|1528
response to drug	Gene Ontology	GO:0042493	12	434	1.06625e-08	2.71935e-07	2203|54677|210|1557|1559|3172|3158|4837|1571|80781|7508|1576
inflammatory response	Gene Ontology	GO:0006954	14	644	1.16434e-08	2.94667e-07	5624|12|3554|8876|6348|3240|6291|731|2|3075|720|718|922|3428
regulation of biological quality	Gene Ontology	GO:0065008	31	3386	1.43649e-08	3.60766e-07	7363|338|760|3778|7018|213|3172|1589|6348|91584|5624|7364|2|2244|283|3293|2266|718|64798|3554|127|6441|10788|1645|5618|12|1826|51218|350|1576|290
fatty acid metabolic process	Gene Ontology	GO:0006631	11	355	1.45919e-08	3.63692e-07	1553|54677|1557|718|1559|1562|23600|1571|3172|1565|2690
secretory granule	Gene Ontology	GO:0030141	11	356	1.50054e-08	3.71185e-07	653509|12|213|6414|6441|2|7018|350|2244|1755|2266
immune response	Gene Ontology	GO:0006955	20	1474	1.87282e-08	4.59819e-07	3554|3429|3428|3119|718|3117|3105|3106|8876|6441|731|2|3075|720|6348|2244|9235|1755|10537|283
aromatase activity	Gene Ontology	GO:0070330	5	23	2.02213e-08	4.92801e-07	1553|1562|1577|1576|1565
arachidonic acid metabolic process	Gene Ontology	GO:0019369	6	52	2.21656e-08	5.36213e-07	1553|1557|1559|1562|1571|1565
secretion	Gene Ontology	GO:0046903	17	1066	2.54351e-08	6.10813e-07	5618|12|213|6414|3172|350|91828|60412|2|7018|6348|2244|283|189|2266|760|290
exocytosis	Gene Ontology	GO:0006887	11	386	3.34333e-08	7.9707e-07	12|213|6414|350|91828|60412|2|7018|6348|2244|2266
membrane-enclosed lumen	Gene Ontology	GO:0031974	35	4357	3.47786e-08	8.17297e-07	883|51218|29969|213|10537|83594|7018|23600|338|3172|2326|6414|5624|26137|2|2244|283|189|2266|54677|53343|10249|3158|3428|5618|12|3240|414|63875|1956|412|350|80781|7508|290
organelle lumen	Gene Ontology	GO:0043233	35	4357	3.47786e-08	8.17297e-07	883|51218|29969|213|10537|83594|7018|23600|338|3172|2326|6414|5624|26137|2|2244|283|189|2266|54677|53343|10249|3158|3428|5618|12|3240|414|63875|1956|412|350|80781|7508|290
response to endogenous stimulus	Gene Ontology	GO:0009719	20	1544	3.96989e-08	9.19784e-07	1645|3554|5618|1589|54677|338|210|718|189|3172|10537|4837|760|1956|412|2244|1571|3158|283|2690
positive regulation of biological process	Gene Ontology	GO:0048518	38	5067	4.48296e-08	1.03139e-06	29969|1826|213|10537|760|3778|124583|7018|338|3172|3105|5624|731|26137|2|2244|1755|2266|412|718|350|5618|1956|3075|6441|23541|10788|283|3429|3428|3119|8876|3117|3240|720|6348|80781|2690
positive regulation of response to stimulus	Gene Ontology	GO:0048584	22	1903	5.52103e-08	1.2614e-06	29969|10537|124583|6348|3105|731|2|2244|1755|2266|718|1956|3075|3172|5618|3428|3119|3117|1826|720|350|2690
lipid binding	Gene Ontology	GO:0008289	13	616	5.60705e-08	1.27222e-06	1645|5288|1589|213|718|3172|127|140683|350|23541|10788|1576|338
cellular hormone metabolic process	Gene Ontology	GO:0034754	7	109	6.28104e-08	1.41539e-06	1645|1589|7363|7364|127|1576|3293
response to bacterium	Gene Ontology	GO:0009617	12	524	7.93407e-08	1.77572e-06	338|210|6441|3105|3240|140683|6348|2244|1755|3158|283|2326
clathrin-coated endocytic vesicle	Gene Ontology	GO:0045334	6	66	8.27022e-08	1.83845e-06	653509|338|3119|3117|1956|6441
cell periphery	Gene Ontology	GO:0071944	37	4962	8.42672e-08	1.86066e-06	9962|338|760|3778|91828|11309|7018|3554|696|3105|3106|100506658|731|2244|2266|5288|390439|59084|412|718|5618|60412|1956|10243|10246|80036|4680|3119|8876|3117|1826|720|350|7508|91584|290|2690
regulation of complement activation	Gene Ontology	GO:0030449	5	33	1.00844e-07	2.21185e-06	731|2|3075|720|718
plasma membrane part	Gene Ontology	GO:0044459	25	2516	1.07579e-07	2.34394e-06	760|3778|11309|7018|3554|696|3105|3106|100506658|731|2244|2266|390439|60412|1956|10243|10246|4680|3119|3117|1826|9962|91584|290|2690
response to nitrogen compound	Gene Ontology	GO:1901698	15	904	1.09559e-07	2.37137e-06	3554|5618|1589|54677|210|10537|189|3172|4837|1956|412|1571|3158|760|2690
intracellular organelle lumen	Gene Ontology	GO:0070013	34	4356	1.16913e-07	2.51401e-06	883|51218|29969|213|10537|83594|7018|23600|338|3172|2326|6414|5624|26137|2|2244|283|189|2266|54677|53343|10249|3158|3428|5618|12|3240|414|63875|1956|412|350|80781|7508
amide binding	Gene Ontology	GO:0033218	9	260	1.28129e-07	2.7373e-06	10841|5618|3119|3117|3105|3106|283|290|2690
regulation of protein activation cascade	Gene Ontology	GO:2000257	5	35	1.31571e-07	2.7927e-06	731|2|3075|720|718
response to organonitrogen compound	Gene Ontology	GO:0010243	14	796	1.50431e-07	3.15234e-06	5618|1589|54677|210|10537|189|3172|4837|1956|412|1571|3158|760|2690
plasma membrane	Gene Ontology	GO:0005886	36	4859	1.58819e-07	3.30705e-06	9962|338|760|3778|11309|7018|3554|696|3105|3106|100506658|731|2244|2266|5288|390439|59084|412|718|5618|60412|1956|10243|10246|80036|4680|3119|8876|3117|1826|720|350|7508|91584|290|2690
regulation of response to stimulus	Gene Ontology	GO:0048583	30	3560	1.61203e-07	3.33559e-06	29969|10537|124583|6348|2203|3105|3106|5624|731|2|2244|1755|2266|718|64798|1956|3075|6441|3172|3554|5618|3428|3119|8876|3117|1826|720|350|91584|2690
regulated exocytosis	Gene Ontology	GO:0045055	9	271	1.7979e-07	3.69693e-06	12|213|6414|350|2|7018|6348|2244|2266
secretory vesicle	Gene Ontology	GO:0099503	11	465	2.06946e-07	4.22889e-06	653509|12|213|6414|6441|2|7018|350|2244|1755|2266
response to hormone	Gene Ontology	GO:0009725	14	852	3.36192e-07	6.78573e-06	1645|5618|1589|338|210|718|189|3172|412|2244|283|3158|760|2690
long-chain fatty acid metabolic process	Gene Ontology	GO:0001676	6	87	3.83435e-07	7.69208e-06	1553|1557|1559|1562|1571|1565
cellular nitrogen compound catabolic process	Gene Ontology	GO:0044270	10	392	3.88592e-07	7.74828e-06	883|1806|6999|635|83594|1565|10840|1577|1576|53343
multicellular organismal process	Gene Ontology	GO:0032501	43	6781	4.94881e-07	9.80818e-06	213|10537|760|3778|6822|11309|7018|3293|3172|3554|6414|3106|5624|26137|2|2244|1755|2266|1645|390439|51218|718|350|5618|60412|1956|6441|3158|283|3428|653509|80036|12|338|8876|1826|4837|412|6348|80781|91584|290|2690
single-multicellular organism process	Gene Ontology	GO:0044707	39	5822	5.50216e-07	1.08396e-05	213|10537|760|11309|7018|3293|3172|6414|3106|5624|26137|2|2244|1755|2266|1645|6822|51218|718|350|60412|1956|6441|3158|283|3428|653509|5618|12|338|8876|1826|4837|412|6348|80781|91584|290|2690
endocytic vesicle membrane	Gene Ontology	GO:0030666	7	153	5.63763e-07	1.10404e-05	338|3119|3117|3105|3106|1956|1755
regulation of response to stress	Gene Ontology	GO:0080134	17	1337	5.9617e-07	1.16059e-05	3554|29969|5624|8876|6348|3106|718|731|1956|3075|720|350|2244|2|1755|2266|3428
icosanoid metabolic process	Gene Ontology	GO:0006690	6	96	6.62733e-07	1.27508e-05	1553|1557|1559|1562|1571|1565
coated vesicle	Gene Ontology	GO:0030135	8	232	6.7596e-07	1.29297e-05	653509|338|3119|3117|3105|3106|1956|6441
small molecule catabolic process	Gene Ontology	GO:0044282	9	322	7.28726e-07	1.38584e-05	883|10841|6822|23600|6999|127|54677|189|53343
cytosol	Gene Ontology	GO:0005829	28	3407	7.6625e-07	1.44883e-05	883|338|210|760|6822|10840|635|474344|2203|6348|100506658|2|27147|5288|23743|6999|2938|1806|4337|60412|127|9235|10788|1645|10841|3428|4837|290
regulation of humoral immune response	Gene Ontology	GO:0002920	5	52	8.04023e-07	1.51156e-05	731|2|3075|720|718
peptide binding	Gene Ontology	GO:0042277	8	240	8.6482e-07	1.61662e-05	5618|3119|3117|3105|3106|283|290|2690
nitrogen compound metabolic process	Gene Ontology	GO:0006807	42	6685	9.30738e-07	1.73002e-05	883|9962|29969|635|6822|83594|53343|2203|2326|6348|210|5624|100506658|26137|1112|283|189|1565|23743|54677|6999|2938|1806|4337|10249|10243|23541|3172|10840|10841|3429|3428|1559|7508|414|63875|1956|412|1577|1576|290|2690
regulation of response to external stimulus	Gene Ontology	GO:0032101	13	794	9.44797e-07	1.74628e-05	3554|1826|718|6348|91584|5624|731|2|3075|720|350|2244|2266
response to cytokine	Gene Ontology	GO:0034097	13	797	9.84468e-07	1.80944e-05	3429|3554|338|3119|10537|3117|3105|3106|5618|210|6348|2244|2690
unsaturated fatty acid metabolic process	Gene Ontology	GO:0033559	6	104	1.03391e-06	1.88975e-05	1553|1557|1559|1562|1571|1565
platelet alpha granule lumen	Gene Ontology	GO:0031093	5	55	1.04128e-06	1.89271e-05	2244|12|2|2266|213
complement activation	Gene Ontology	GO:0006956	5	56	1.13156e-06	2.0455e-05	731|2|3075|720|718
regulation of biological process	Gene Ontology	GO:0050789	56	10509	1.17271e-06	2.10831e-05	51218|29969|1826|213|635|10537|760|3778|124583|7018|338|3172|2203|91584|3105|3106|5624|731|26137|2|2244|1755|189|2266|1565|5288|390439|412|718|350|5618|64798|60412|1956|3075|6441|23541|10788|283|3428|3554|3429|12|3119|4680|8876|3117|3240|10982|720|6348|80781|7508|1112|290|2690
cellular response to cytokine stimulus	Gene Ontology	GO:0071345	12	689	1.35647e-06	2.42543e-05	3429|3554|338|3119|3117|3105|3106|5618|210|6348|2244|2690
sulfur compound metabolic process	Gene Ontology	GO:0006790	9	351	1.45693e-06	2.59097e-05	23743|6999|2938|100506658|6822|10249|635|3172|2690
cofactor binding	Gene Ontology	GO:0048037	8	262	1.63187e-06	2.88648e-05	883|1806|3172|213|718|127|189|2326
intrinsic component of membrane	Gene Ontology	GO:0031224	36	5355	1.669e-06	2.93538e-05	7364|3778|124583|11309|3554|696|5618|91584|1582|3105|3106|7363|100506658|731|1528|390439|59084|9962|388595|80036|1956|23541|10246|2326|93517|3429|3119|4680|8876|3117|1826|412|1571|1576|290|2690
organic acid biosynthetic process	Gene Ontology	GO:0016053	8	263	1.67736e-06	2.93538e-05	883|1806|23743|3172|23600|635|1582|189
receptor-mediated endocytosis	Gene Ontology	GO:0006898	8	266	1.82036e-06	3.1521e-05	338|3240|7018|6441|922|2690|1755|213
hormone metabolic process	Gene Ontology	GO:0042445	7	184	1.84481e-06	3.1777e-05	1645|1589|7363|7364|127|1576|3293
regulation of hormone levels	Gene Ontology	GO:0010817	10	473	2.02969e-06	3.44211e-05	1645|1589|7363|7364|127|2244|3172|2266|1576|3293
cell surface	Gene Ontology	GO:0009986	12	726	2.30411e-06	3.88745e-05	5618|3554|3105|3106|1956|7018|350|2244|10788|2266|290|2690
organic substance transport	Gene Ontology	GO:0071702	23	2585	2.48381e-06	4.16925e-05	29969|213|760|11309|7018|338|6348|27147|2244|1755|189|2266|1645|54677|718|60412|1956|3172|283|653509|3429|9962|350
integral component of membrane	Gene Ontology	GO:0016021	35	5233	2.77411e-06	4.6329e-05	7364|3778|124583|11309|3554|696|5618|91584|1582|3105|3106|7363|100506658|731|1528|390439|59084|9962|388595|80036|1956|23541|10246|2326|93517|3429|3119|4680|8876|3117|1826|412|1576|290|2690
positive regulation of immune system process	Gene Ontology	GO:0002684	13	879	2.83693e-06	4.69765e-05	3428|3119|8876|3117|3105|760|718|731|2|3075|720|6348|1755
cellular amino acid metabolic process	Gene Ontology	GO:0006520	8	283	2.84247e-06	4.69765e-05	883|10841|23743|3172|635|10249|189|2690
vitamin metabolic process	Gene Ontology	GO:0006766	6	128	3.26914e-06	5.27229e-05	10840|8876|83594|9962|1528|1576
regulation of inflammatory response	Gene Ontology	GO:0050727	8	291	3.47118e-06	5.54562e-05	3554|718|6348|5624|731|2|3075|720
regulation of cellular process	Gene Ontology	GO:0050794	53	9997	3.47233e-06	5.54562e-05	51218|29969|1826|213|635|10537|760|3778|124583|7018|338|3172|2203|91584|3105|3106|5624|26137|2|2244|1755|189|2266|1565|5288|390439|412|718|350|5618|64798|60412|1956|6441|23541|10788|283|3428|3554|3429|12|3119|4680|8876|3117|3240|10982|720|6348|80781|7508|1112|2690
identical protein binding	Gene Ontology	GO:0042802	15	1210	3.93378e-06	6.25224e-05	883|1806|5618|2203|213|210|6348|3172|3428|1956|350|189|283|80781|2690
response to other organism	Gene Ontology	GO:0051707	13	910	4.10659e-06	6.46444e-05	3428|338|210|6441|3105|3240|140683|6348|2244|1755|3158|283|2326
response to external biotic stimulus	Gene Ontology	GO:0043207	13	910	4.10659e-06	6.46444e-05	3428|338|210|6441|3105|3240|140683|6348|2244|1755|3158|283|2326
platelet alpha granule	Gene Ontology	GO:0031091	5	75	4.37054e-06	6.81472e-05	2244|12|2|2266|213
regulation of acute inflammatory response	Gene Ontology	GO:0002673	5	75	4.37054e-06	6.81472e-05	731|2|3075|720|718
organic acid catabolic process	Gene Ontology	GO:0016054	7	212	4.55251e-06	7.06497e-05	883|10841|6822|23600|6999|54677|189
coated vesicle membrane	Gene Ontology	GO:0030662	6	140	5.36294e-06	8.24489e-05	338|3119|3117|3105|3106|1956
glycosyl compound metabolic process	Gene Ontology	GO:1901657	9	414	5.4006e-06	8.26417e-05	1645|1806|6822|2203|54677|53343|4337|100506658|10243
secretion by cell	Gene Ontology	GO:0032940	13	939	5.72652e-06	8.72235e-05	12|213|6414|350|91828|60412|2|7018|6348|2244|283|3172|2266
organic cyclic compound catabolic process	Gene Ontology	GO:1901361	9	418	5.82466e-06	8.83093e-05	883|1806|6822|6999|83594|10840|412|1576|53343
response to biotic stimulus	Gene Ontology	GO:0009607	13	946	6.19356e-06	9.34716e-05	3428|338|210|6441|3105|3240|140683|6348|2244|1755|3158|283|2326
regulation of protein processing	Gene Ontology	GO:0070613	5	81	6.24187e-06	9.37706e-05	731|2|3075|720|718
protein metabolic process	Gene Ontology	GO:0019538	34	5191	6.43506e-06	9.62334e-05	29969|338|10537|635|6348|5624|731|2|2244|1755|189|2266|412|718|4337|5618|64798|1956|3075|6441|10243|3172|283|3428|653509|3429|12|414|63875|720|350|7508|290|2690
regulation of protein maturation	Gene Ontology	GO:1903317	5	82	6.60676e-06	9.8354e-05	731|2|3075|720|718
cellular ketone metabolic process	Gene Ontology	GO:0042180	7	225	6.63898e-06	9.83885e-05	883|1645|1589|6999|127|3172|3293
negative regulation of biological process	Gene Ontology	GO:0048519	31	4494	6.73632e-06	9.93833e-05	29969|1826|213|3172|2203|6348|3106|5624|26137|2|2244|283|2266|1565|718|5618|64798|1956|6441|10788|3428|3429|12|8876|3240|720|350|80781|7508|1112|290
multi-organism process	Gene Ontology	GO:0051704	21	2352	6.92519e-06	0.000101714	2326|5618|3428|213|210|6441|6414|3106|3240|140683|29969|6348|3554|412|3105|2244|1755|3158|283|290|338
regulation of immune response	Gene Ontology	GO:0050776	12	824	8.14379e-06	0.000118031	3428|3119|718|3117|3105|3106|731|2|3075|720|6441|1755
water-soluble vitamin metabolic process	Gene Ontology	GO:0006767	5	86	8.23651e-06	0.000118851	10840|1528|9962|83594|8876
positive regulation of cellular process	Gene Ontology	GO:0048522	31	4559	9.00058e-06	0.000128747	29969|1826|338|10537|760|3778|124583|7018|3172|6348|5624|2244|283|2266|412|718|5618|1956|6441|23541|10788|3429|3428|3119|8876|3117|3240|720|350|80781|2690
lipid localization	Gene Ontology	GO:0010876	8	335	9.45315e-06	0.000134636	653509|1645|54677|213|718|11309|350|338
clathrin-coated vesicle	Gene Ontology	GO:0030136	6	156	9.729e-06	0.000137967	653509|338|3119|3117|1956|6441
carboxylic acid biosynthetic process	Gene Ontology	GO:0046394	7	242	1.0513e-05	0.000147811	883|23743|3172|23600|635|1582|189
response to interferon-gamma	Gene Ontology	GO:0034341	6	160	1.11793e-05	0.000155847	3119|10537|3117|3105|3106|6348
biosynthetic process	Gene Ontology	GO:0009058	37	6087	1.20513e-05	0.000166592	883|29969|338|210|124583|10840|3293|2203|1582|6348|3172|7363|7364|26137|1112|283|189|5288|23743|23600|635|2938|718|4337|5618|1589|6441|10243|23541|3158|93517|1806|3429|3428|63875|1956|1576
single-organism developmental process	Gene Ontology	GO:0044767	35	5604	1.27656e-05	0.000175727	338|10537|760|11309|83938|3293|3172|6414|3106|5624|6348|2|2244|1755|2266|51218|2938|718|60412|1956|6441|3158|283|1645|5618|3428|8876|1826|4837|412|350|80781|91584|290|2690
transferase activity	Gene Ontology	GO:0016740	20	2269	1.42314e-05	0.000194081	883|10841|23743|189|54677|635|2938|5288|7364|7363|100506658|6822|4837|391365|1956|10249|10840|6348|10243|3158
endocytosis	Gene Ontology	GO:0006897	10	595	1.45193e-05	0.000194973	338|213|718|3240|7018|720|6441|1755|922|2690
activation of immune response	Gene Ontology	GO:0002253	9	480	1.71045e-05	0.000227052	3428|3119|718|3117|731|2|3075|720|1755
regulation of immune system process	Gene Ontology	GO:0002682	15	1372	1.71152e-05	0.000227052	3428|3119|8876|3117|3105|3106|718|731|2|3075|720|6348|6441|1755|760
positive regulation of immune response	Gene Ontology	GO:0050778	10	609	1.76568e-05	0.000233296	3428|3119|718|3117|3105|731|2|3075|720|1755
developmental process	Gene Ontology	GO:0032502	35	5693	1.79642e-05	0.000236409	338|10537|760|11309|83938|3293|3172|6414|3106|5624|6348|2|2244|1755|2266|51218|2938|718|60412|1956|6441|3158|283|1645|5618|3428|8876|1826|4837|412|350|80781|91584|290|2690
integral component of plasma membrane	Gene Ontology	GO:0005887	16	1562	1.93291e-05	0.000253357	390439|1826|696|4680|3117|3105|3106|3778|731|11309|3554|9962|10246|91584|290|2690
regulation of defense response	Gene Ontology	GO:0031347	11	756	1.99222e-05	0.000259067	3554|3428|718|6348|3106|5624|731|2|3075|720|1755
macromolecule localization	Gene Ontology	GO:0033036	22	2734	2.03528e-05	0.000262933	29969|213|91828|11309|7018|338|6348|27147|2244|1755|2266|1645|54677|718|60412|1956|10243|3172|283|653509|3429|350
organic substance biosynthetic process	Gene Ontology	GO:1901576	36	5991	2.14475e-05	0.000272441	883|29969|338|210|124583|3293|2203|1582|6348|3172|7363|7364|26137|1112|283|189|5288|23743|23600|635|2938|718|4337|5618|1589|6441|10243|23541|3158|93517|1806|3429|3428|63875|1956|1576
immune effector process	Gene Ontology	GO:0002252	11	763	2.16496e-05	0.00027395	3428|3119|718|3105|3106|731|2|3075|720|6348|1755
cellular nitrogen compound metabolic process	Gene Ontology	GO:0034641	37	6259	2.25965e-05	0.000284837	883|29969|635|83594|53343|2203|2326|6348|210|5624|100506658|26137|1112|283|1565|6822|54677|6999|2938|1806|4337|1956|10243|23541|3172|10840|10841|3429|3428|1559|7508|63875|9962|1577|1576|290|2690
lipid catabolic process	Gene Ontology	GO:0016042	7	278	2.5042e-05	0.000314459	6822|23600|338|412|350|54677|1576
carboxylic acid catabolic process	Gene Ontology	GO:0046395	6	186	2.54498e-05	0.000318364	883|10841|6822|23600|54677|189
acylglycerol metabolic process	Gene Ontology	GO:0006639	5	110	2.5677e-05	0.00031999	1571|350|338|283|718
neutral lipid metabolic process	Gene Ontology	GO:0006638	5	111	2.67701e-05	0.000329864	1571|350|338|283|718
oxidoreductase activity, acting on the CH-OH group of donors, NAD or NADP as acceptor	Gene Ontology	GO:0016616	5	111	2.67701e-05	0.000329864	93517|1645|127|1528|3293
leukocyte mediated immunity	Gene Ontology	GO:0002443	7	282	2.73677e-05	0.00033597	3119|718|3105|3106|731|720|6348
nucleoside metabolic process	Gene Ontology	GO:0009116	8	392	2.84278e-05	0.000346398	1806|6822|2203|54677|53343|4337|100506658|10243
intrinsic component of plasma membrane	Gene Ontology	GO:0031226	16	1619	2.96774e-05	0.00036029	390439|1826|696|4680|3117|3105|3106|3778|731|11309|3554|9962|10246|91584|290|2690
macromolecular complex	Gene Ontology	GO:0032991	30	4606	2.99505e-05	0.000362269	338|3778|91828|7018|213|3172|3554|3105|3106|731|2244|283|2266|5288|4337|60412|1956|6441|10788|653509|3119|3117|3240|6291|63875|350|80781|7508|91584|2690
regulation of localization	Gene Ontology	GO:0032879	20	2405	3.24434e-05	0.000389557	3429|1826|338|718|6348|91584|3778|29969|760|7018|1956|720|350|2244|3172|283|80781|2266|6441|290
receptor binding	Gene Ontology	GO:0005102	15	1458	3.42179e-05	0.00040937	23600|3172|3554|54677|338|718|6348|3106|2|7018|2244|9235|283|189|2266
negative regulation of cellular process	Gene Ontology	GO:0048523	28	4171	3.4836e-05	0.000412267	29969|1826|213|2203|6348|5624|26137|2|2244|283|2266|1565|718|5618|64798|1956|6441|3172|3428|3429|12|8876|3240|720|350|80781|7508|1112
response to abiotic stimulus	Gene Ontology	GO:0009628	13	1122	3.61609e-05	0.000426413	3554|80036|80781|2326|210|760|3778|1956|412|283|3158|7508|3428
endoplasmic reticulum lumen	Gene Ontology	GO:0005788	6	200	3.77339e-05	0.000441796	338|5624|414|412|80781|2326
organic hydroxy compound metabolic process	Gene Ontology	GO:1901615	8	409	3.81416e-05	0.000444982	1589|338|1582|127|23541|3158|1576|3293
side of membrane	Gene Ontology	GO:0098552	8	412	4.01146e-05	0.000464708	3119|3117|3105|3106|7018|2244|2266|290
regulation of cell death	Gene Ontology	GO:0010941	15	1480	4.05041e-05	0.000467573	5624|3429|3778|213|8876|6348|3240|5618|64798|1956|2266|350|2244|80781|10537
lipid transport	Gene Ontology	GO:0006869	7	302	4.18298e-05	0.000479512	653509|1645|54677|213|11309|350|338
cytokine-mediated signaling pathway	Gene Ontology	GO:0019221	9	543	4.39181e-05	0.000500015	3429|3554|3119|3117|3105|3106|5618|6348|2690
cellular protein metabolic process	Gene Ontology	GO:0044267	30	4725	4.82997e-05	0.000546069	29969|338|10537|635|6348|5624|2|2244|1755|189|2266|720|718|4337|5618|64798|1956|6441|10243|3172|283|3428|653509|3429|12|414|63875|412|7508|2690
endosomal part	Gene Ontology	GO:0044440	8	430	5.38311e-05	0.000602395	5618|338|3119|3117|3105|3106|1956|7018
lymphocyte mediated immunity	Gene Ontology	GO:0002449	6	214	5.43779e-05	0.000606452	3119|718|3105|3106|731|720
transferase activity, transferring one-carbon groups	Gene Ontology	GO:0016741	6	215	5.57605e-05	0.000619771	10840|10841|23743|635|100506658|4837
organic anion transport	Gene Ontology	GO:0015711	7	318	5.74698e-05	0.000634482	1645|54677|213|760|11309|9962|189
oxidoreductase activity, acting on CH-OH group of donors	Gene Ontology	GO:0016614	5	132	5.93222e-05	0.000650566	93517|1645|127|1528|3293
sterol metabolic process	Gene Ontology	GO:0016125	5	132	5.93222e-05	0.000650566	1582|1589|23541|3158|338
cell death	Gene Ontology	GO:0008219	17	1914	6.14849e-05	0.000670107	5624|3429|3778|213|8876|6348|3240|5618|64798|1956|2266|350|2244|922|80781|10537|3428
organic cyclic compound binding	Gene Ontology	GO:0097159	34	5780	6.15113e-05	0.000670107	213|474344|6782|2326|1582|26137|1112|4337|283|1528|1565|5288|6999|1806|2203|50865|1589|127|10243|23541|3172|1562|3428|1645|10841|1553|12|1557|1559|7508|1956|1571|1577|1576
nucleobase-containing small molecule metabolic process	Gene Ontology	GO:0055086	10	712	6.43703e-05	0.000696639	1806|6822|2203|54677|53343|4337|100506658|83594|10243|2326
intrinsic component of endoplasmic reticulum membrane	Gene Ontology	GO:0031227	5	135	6.57448e-05	0.000709181	3117|3105|1571|3106|3119
anatomical structure development	Gene Ontology	GO:0048856	32	5313	6.97952e-05	0.00074554	338|10537|760|11309|3293|3172|6414|3106|5624|6348|2244|1755|2266|51218|2938|718|60412|1956|6441|3158|283|1645|5618|3428|8876|1826|4837|412|350|80781|91584|290
proteolysis	Gene Ontology	GO:0006508	15	1559	7.22824e-05	0.00076466	5624|3429|12|718|10537|731|2|3075|720|350|2244|189|2266|290|3428
cellular response to interferon-gamma	Gene Ontology	GO:0071346	5	138	7.26908e-05	0.000766367	3117|3105|3106|3119|6348
defense response to bacterium	Gene Ontology	GO:0042742	6	226	7.29097e-05	0.000766367	3240|140683|6441|2244|1755|283
regulation of apoptotic process	Gene Ontology	GO:0042981	14	1379	7.31731e-05	0.000766686	5624|3429|3778|213|8876|6348|10537|5618|64798|1956|350|2244|80781|2266
anion transport	Gene Ontology	GO:0006820	8	453	7.68477e-05	0.000802631	1645|54677|213|760|11309|9962|189|10246
cellular response to organic substance	Gene Ontology	GO:0071310	18	2149	7.71299e-05	0.00080303	1645|3554|3429|1589|338|3119|3117|3105|3106|5618|1956|210|6348|2244|3172|3158|760|2690
positive regulation of intracellular signal transduction	Gene Ontology	GO:1902533	11	882	7.83534e-05	0.000808096	5618|718|6348|10537|124583|29969|1956|2244|3172|2266|2690
regulation of programmed cell death	Gene Ontology	GO:0043067	14	1391	8.01221e-05	0.000823704	5624|3429|3778|213|8876|6348|10537|5618|64798|1956|350|2244|80781|2266
protein complex	Gene Ontology	GO:0043234	26	3913	8.40953e-05	0.00085796	213|3778|91828|7018|3172|3554|3105|3106|731|2244|283|2266|5288|4337|60412|1956|6441|10788|653509|3119|3117|3240|80781|7508|91584|2690
phosphate-containing compound metabolic process	Gene Ontology	GO:0006796	22	3008	8.42313e-05	0.00085796	29969|83594|2203|2326|6348|2244|283|2266|5288|6822|54677|53343|718|4337|64798|1956|10243|3172|10246|5618|1826|2690
purine ribonucleoside metabolic process	Gene Ontology	GO:0046128	7	340	8.64987e-05	0.000878335	6822|2203|54677|53343|4337|100506658|10243
response to lipid	Gene Ontology	GO:0033993	11	893	8.72915e-05	0.00088346	189|338|210|718|6348|3172|2326|1956|350|3158|2690
phosphorus metabolic process	Gene Ontology	GO:0006793	22	3016	8.75404e-05	0.00088346	29969|83594|2203|2326|6348|2244|283|2266|5288|6822|54677|53343|718|4337|64798|1956|10243|3172|10246|5618|1826|2690
purine nucleoside metabolic process	Gene Ontology	GO:0042278	7	343	9.12481e-05	0.000918062	6822|2203|54677|53343|4337|100506658|10243
apoptotic process	Gene Ontology	GO:0006915	16	1786	9.34909e-05	0.000937759	5624|3429|3778|213|8876|6348|10537|5618|64798|1956|350|2244|922|80781|2266|3428
cellular response to hormone stimulus	Gene Ontology	GO:0032870	9	607	0.00010128	0.00100064	1645|5618|1589|338|3172|2244|3158|760|2690
programmed cell death	Gene Ontology	GO:0012501	16	1808	0.00010756	0.0010595	5624|3429|3778|213|8876|6348|10537|5618|64798|1956|350|2244|922|80781|2266|3428
blood coagulation	Gene Ontology	GO:0007596	7	353	0.000108639	0.00106693	718|5624|2|350|2244|3172|2266
carboxylic acid binding	Gene Ontology	GO:0031406	5	151	0.000109555	0.00106892	1645|3172|189|6999|213
cellular amide metabolic process	Gene Ontology	GO:0043603	11	917	0.000109868	0.00106892	10840|10841|2938|1559|5624|83594|63875|1956|283|290|2690
heterocyclic compound binding	Gene Ontology	GO:1901363	33	5701	0.000112383	0.00108747	213|474344|6782|2326|1582|26137|1112|4337|283|1528|1565|5288|6999|1806|2203|50865|1589|127|10243|23541|3172|1562|3428|10841|1553|12|1557|1559|7508|1956|1571|1577|1576
hemostasis	Gene Ontology	GO:0007599	7	358	0.000118295	0.00113453	718|5624|2|350|2244|3172|2266
coagulation	Gene Ontology	GO:0050817	7	358	0.000118295	0.00113453	718|5624|2|350|2244|3172|2266
positive regulation of phosphorylation	Gene Ontology	GO:0042327	11	925	0.000118426	0.00113453	5618|718|6348|1826|29969|1956|2244|283|3172|2266|2690
heterocycle metabolic process	Gene Ontology	GO:0046483	33	5717	0.000118626	0.00113453	883|29969|210|83594|53343|2203|2326|6348|100506658|26137|1112|283|1565|6822|54677|6999|1806|4337|1553|1956|10243|23541|3172|10840|10841|3429|3428|1557|9962|1571|7508|1576|2690
animal organ development	Gene Ontology	GO:0048513	22	3087	0.000122407	0.00116393	10537|760|11309|3293|6414|3106|6348|283|412|60412|1956|6441|3158|5618|3428|8876|1826|4837|51218|350|80781|91584
glycerolipid metabolic process	Gene Ontology	GO:0046486	7	361	0.000124415	0.00117962	5288|338|718|1956|350|1571|283
regulation of protein metabolic process	Gene Ontology	GO:0051246	19	2443	0.000125783	0.00118915	3429|12|718|6348|5618|29969|64798|731|3428|1956|3075|720|6441|2244|2|283|3172|2266|2690
cell communication	Gene Ontology	GO:0007154	34	6000	0.000129489	0.00122068	29969|213|10537|760|59084|124583|3172|2203|3105|3106|2|2244|1755|189|2266|5288|390439|718|5618|64798|1956|10788|283|3554|3429|3428|3119|4680|8876|3117|10982|6348|91584|2690
anion binding	Gene Ontology	GO:0043168	6	252	0.000130376	0.00122553	883|1645|189|6999|3172|213
organic hydroxy compound biosynthetic process	Gene Ontology	GO:1901617	5	158	0.000134577	0.00125784	23541|3158|338|1576|3293
negative regulation of metabolic process	Gene Ontology	GO:0009892	19	2465	0.000141128	0.00131161	3429|2203|718|6348|3172|3240|1565|29969|64798|1956|2|720|350|6441|283|12|26137|1112|3428
vesicle membrane	Gene Ontology	GO:0012506	8	497	0.00014375	0.00133222	338|3119|3117|3105|3106|1956|1755|290
ribonucleoside metabolic process	Gene Ontology	GO:0009119	7	370	0.000144338	0.00133391	6822|2203|54677|53343|4337|100506658|10243
regulation of intracellular signal transduction	Gene Ontology	GO:1902531	15	1662	0.000145295	0.001339	5618|2203|718|6348|8876|124583|29969|64798|1956|2|2266|2244|3172|10537|2690
plasma membrane protein complex	Gene Ontology	GO:0098797	8	502	0.00015372	0.00140874	3119|3117|3105|3106|3778|731|1956|7018
regulation of body fluid levels	Gene Ontology	GO:0050878	8	506	0.0001621	0.00147323	5618|718|5624|2|350|2244|3172|2266
carboxylic acid transport	Gene Ontology	GO:0046942	6	263	0.0001635	0.00148186	1645|54677|213|11309|9962|189
regulation of catalytic activity	Gene Ontology	GO:0050790	18	2289	0.000168864	0.00152627	3429|12|718|6348|3172|3240|5618|29969|64798|3428|1956|27147|720|350|2|283|10788|2690
negative regulation of cellular metabolic process	Gene Ontology	GO:0031324	18	2290	0.000169769	0.00153024	3429|2203|718|6348|3172|3240|1565|29969|64798|1956|2|720|6441|283|12|26137|1112|3428
lyase activity	Gene Ontology	GO:0016829	5	170	0.000187394	0.00167534	883|10841|760|210|4337
response to oxidative stress	Gene Ontology	GO:0006979	7	387	0.000189015	0.00168526	3554|210|8876|6414|3240|9962|1571
positive regulation of ERK1 and ERK2 cascade	Gene Ontology	GO:0070374	5	175	0.000213547	0.00188356	2244|6348|1956|2266|718
endosome membrane	Gene Ontology	GO:0010008	7	397	0.000220127	0.00192611	338|3119|3117|3105|3106|1956|7018
vacuole	Gene Ontology	GO:0005773	12	1169	0.00022276	0.00194398	5618|338|3119|3117|3105|3106|414|7018|1956|412|6441|290
response to alcohol	Gene Ontology	GO:0097305	5	177	0.000224752	0.00195618	6348|1571|3158|210|2690
regulation of lipid metabolic process	Gene Ontology	GO:0019216	6	283	0.000240522	0.00207193	12|338|718|350|23541|3172
homeostatic process	Gene Ontology	GO:0042592	14	1549	0.000241758	0.00207193	1645|51218|12|213|6348|760|3778|3554|7018|6441|283|3172|290|338
response to acid chemical	Gene Ontology	GO:0001101	6	284	0.000245012	0.00207221	1645|80781|210|1956|1571|3158
response to peptide hormone	Gene Ontology	GO:0043434	7	405	0.000247885	0.00209113	5618|1589|3158|760|412|3172|2690
regulation of multicellular organismal process	Gene Ontology	GO:0051239	19	2581	0.000252684	0.00212617	5618|5624|213|8876|6348|3106|718|760|26137|3428|350|2244|3172|6441|1826|2266|91584|290|2690
vacuolar part	Gene Ontology	GO:0044437	9	690	0.000259057	0.00216465	5618|338|3119|3117|3105|3106|1956|7018|290
regulation of phosphorylation	Gene Ontology	GO:0042325	13	1371	0.000259231	0.00216465	5618|2203|718|6348|1826|29969|64798|1956|2244|283|3172|2266|2690
activation of protein kinase activity	Gene Ontology	GO:0032147	6	293	0.000288467	0.00237858	5618|29969|1956|283|3172|2690
regulation of transport	Gene Ontology	GO:0051049	15	1774	0.000290936	0.00239295	3429|7018|718|6348|760|3778|29969|1956|720|6441|2244|283|3172|2266|290
regulation of immune effector process	Gene Ontology	GO:0002697	7	420	0.00030751	0.00250383	718|3105|3106|731|2|3075|720
cellular response to peptide hormone stimulus	Gene Ontology	GO:0071375	6	297	0.000309622	0.00250383	5618|1589|3158|760|3172|2690
purine-containing compound metabolic process	Gene Ontology	GO:0072521	8	558	0.000309908	0.00250383	1806|6822|2203|54677|53343|4337|100506658|10243
carbohydrate derivative metabolic process	Gene Ontology	GO:1901135	12	1213	0.000310237	0.00250383	1645|1806|6822|2203|54677|53343|4337|100506658|124583|414|412|10243
positive regulation of phosphate metabolic process	Gene Ontology	GO:0045937	11	1042	0.000325412	0.00258601	5618|718|6348|1826|29969|1956|2244|283|3172|2266|2690
positive regulation of phosphorus metabolic process	Gene Ontology	GO:0010562	11	1042	0.000325412	0.00258601	5618|718|6348|1826|29969|1956|2244|283|3172|2266|2690
multicellular organism development	Gene Ontology	GO:0007275	28	4770	0.000345486	0.00273233	338|10537|760|11309|3293|3172|6414|3106|5624|6348|1755|51218|718|60412|1956|6441|3158|283|5618|3428|8876|1826|4837|412|350|80781|91584|290
ion transport	Gene Ontology	GO:0006811	13	1415	0.000349504	0.00275748	1645|80036|54677|213|6348|760|3778|11309|7018|9962|10246|189|1528
positive regulation of protein phosphorylation	Gene Ontology	GO:0001934	10	883	0.000356877	0.00280765	5618|718|6348|29969|1956|2244|283|3172|2266|2690
signal transduction	Gene Ontology	GO:0007165	31	5542	0.00035757	0.00280765	29969|10537|760|124583|3172|2203|3105|3106|2|2244|1755|189|2266|5288|390439|718|5618|64798|1956|10788|3554|3429|3428|4680|3119|8876|3117|10982|6348|91584|2690
tissue homeostasis	Gene Ontology	GO:0001894	5	198	0.000371352	0.00290892	760|12|213|7018|6441
Golgi apparatus	Gene Ontology	GO:0005794	13	1431	0.000388401	0.00301394	10841|29969|213|3119|3117|3105|3106|5624|124583|1956|412|1571|338
mitochondrion	Gene Ontology	GO:0005739	14	1630	0.000401812	0.0030887	10840|3429|189|54677|53343|89876|63875|10249|51218|23600|1571|3158|1528|1565
response to peptide	Gene Ontology	GO:1901652	7	440	0.000404394	0.0031013	5618|1589|3158|760|412|3172|2690
cellular response to peptide	Gene Ontology	GO:1901653	6	314	0.000413483	0.00316363	5618|1589|3158|760|3172|2690
vacuolar membrane	Gene Ontology	GO:0005774	8	586	0.00042669	0.00324956	338|3119|3117|3105|3106|1956|7018|290
cellular response to oxygen-containing compound	Gene Ontology	GO:1901701	10	909	0.000446421	0.00339198	1645|3554|5618|1589|6348|3172|1956|3158|760|2690
response to toxic substance	Gene Ontology	GO:0009636	5	210	0.000482399	0.00361525	6348|3240|10249|213|210
adaptive immune response based on somatic recombination of immune receptors built from immunoglobulin superfamily domains	Gene Ontology	GO:0002460	5	213	0.000513694	0.00381502	731|3105|3119|720|718
positive regulation of transport	Gene Ontology	GO:0051050	10	928	0.000523077	0.00387596	7018|718|6348|760|1956|720|6441|2244|283|2266
locomotion	Gene Ontology	GO:0040011	13	1480	0.000531304	0.00392807	5288|1826|338|4680|6348|91584|5624|6291|1956|350|6441|283|80781
bounding membrane of organelle	Gene Ontology	GO:0098588	14	1694	0.00058578	0.00423351	10841|3429|338|3119|3117|3105|3106|124583|1956|7018|1571|1528|1755|290
regulation of anatomical structure size	Gene Ontology	GO:0090066	7	469	0.000586772	0.00423351	3778|91584|1826|64798|2244|10788|2266
positive regulation of MAPK cascade	Gene Ontology	GO:0043410	7	470	0.000594063	0.00427568	29969|718|6348|1956|2244|2266|2690
adaptive immune response	Gene Ontology	GO:0002250	6	337	0.000595216	0.00427568	3119|718|3105|731|720|2244
regulation of molecular function	Gene Ontology	GO:0065009	19	2773	0.000609835	0.00437115	3429|12|718|6348|3172|3240|5618|29969|64798|3428|1956|27147|720|350|2|283|10788|1565|2690
regulation of hydrolase activity	Gene Ontology	GO:0051336	12	1316	0.000634912	0.004541	3429|12|718|6348|1956|27147|720|350|2|283|10788|3428
sulfur compound binding	Gene Ontology	GO:1901681	5	224	0.000641655	0.00455576	283|3172|338|3075|350
system development	Gene Ontology	GO:0048731	25	4206	0.000642515	0.00455576	338|10537|760|11309|3293|6414|3106|6348|283|51218|718|60412|1956|6441|3158|5618|3428|8876|1826|4837|412|350|80781|91584|290
cellular response to organonitrogen compound	Gene Ontology	GO:0071417	7	477	0.000647138	0.00457868	5618|1589|3158|760|1956|3172|2690
cytoplasmic vesicle membrane	Gene Ontology	GO:0030659	7	478	0.000655018	0.00462449	338|3119|3117|3105|3106|1956|1755
regulation of cell adhesion	Gene Ontology	GO:0030155	8	629	0.00067366	0.0046688	5618|3119|8876|3117|1826|6441|2244|2266
positive regulation of catalytic activity	Gene Ontology	GO:0043085	13	1520	0.000678965	0.00467321	3429|3428|6348|3172|5618|29969|1956|27147|350|2|283|10788|2690
endosome	Gene Ontology	GO:0005768	9	792	0.000690433	0.00474222	5618|338|3119|3117|3105|3106|7018|1956|412
cellular aromatic compound metabolic process	Gene Ontology	GO:0006725	31	5765	0.000705489	0.00481548	883|29969|210|83594|53343|2203|2326|6348|100506658|26137|1112|283|1565|6822|54677|6999|1806|4337|1553|1956|10243|23541|3172|10840|10841|3429|3428|9962|1571|7508|290
negative regulation of endopeptidase activity	Gene Ontology	GO:0010951	5	229	0.000707122	0.00481663	3428|12|2|720|718
cell surface receptor signaling pathway	Gene Ontology	GO:0007166	18	2583	0.000709178	0.00482066	390439|3554|5618|3119|3117|3105|3106|3429|29969|64798|1956|6348|2244|3172|189|2266|91584|2690
organonitrogen compound biosynthetic process	Gene Ontology	GO:1901566	12	1335	0.000718586	0.0048645	883|1806|23743|635|2938|4337|210|63875|1956|10243|283|189
cell differentiation	Gene Ontology	GO:0030154	22	3519	0.000743834	0.00502508	338|10537|760|83938|6348|3106|5624|2|2244|1755|2266|2938|3172|283|1645|5618|3428|8876|1826|80781|91584|290
intracellular signal transduction	Gene Ontology	GO:0035556	18	2598	0.000757916	0.00510972	5288|5618|2203|718|6348|3172|8876|124583|29969|64798|3428|1956|2|2266|2244|10788|10537|2690
whole membrane	Gene Ontology	GO:0098805	12	1344	0.000761342	0.00512232	3429|338|3119|3117|3105|3106|3778|1956|7018|1755|1528|290
negative regulation of response to stimulus	Gene Ontology	GO:0048585	12	1355	0.00081648	0.00544872	2203|8876|3106|5624|64798|1956|2|350|2244|3172|2266|3428
nucleotide metabolic process	Gene Ontology	GO:0009117	8	650	0.000830519	0.00552002	6822|2203|54677|53343|4337|83594|10243|2326
apical part of cell	Gene Ontology	GO:0045177	6	360	0.000833674	0.00552981	9962|760|3778|100506658|11309|7018
negative regulation of peptidase activity	Gene Ontology	GO:0010466	5	239	0.000852903	0.00563464	3428|12|2|720|718
cell migration	Gene Ontology	GO:0016477	11	1177	0.000881769	0.00580204	338|4680|6348|91584|5624|6291|1956|350|6441|283|80781
regulation of ERK1 and ERK2 cascade	Gene Ontology	GO:0070372	5	241	0.000884558	0.00580878	2244|6348|1956|2266|718
regulation of endopeptidase activity	Gene Ontology	GO:0052548	6	365	0.000894087	0.005848	3429|12|718|2|720|3428
nucleoside phosphate metabolic process	Gene Ontology	GO:0006753	8	658	0.000897492	0.00585374	6822|2203|54677|53343|4337|83594|10243|2326
positive regulation of cell-cell adhesion	Gene Ontology	GO:0022409	5	242	0.00090071	0.00585374	3117|2244|2266|3119|8876
chemical homeostasis	Gene Ontology	GO:0048878	10	1000	0.000919701	0.00594463	1645|3554|338|6348|760|3778|7018|6441|3172|290
receptor activity	Gene Ontology	GO:0004872	13	1579	0.000959227	0.00615176	390439|3554|696|3119|3117|91584|5618|1956|1755|3172|922|290|2690
molecular transducer activity	Gene Ontology	GO:0060089	13	1579	0.000959227	0.00615176	390439|3554|696|3119|3117|91584|5618|1956|1755|3172|922|290|2690
cellular developmental process	Gene Ontology	GO:0048869	23	3837	0.000981779	0.00628415	338|10537|760|83938|6348|3106|5624|2|2244|1755|2266|2938|1956|3172|283|1645|5618|3428|8876|1826|80781|91584|290
cellular biosynthetic process	Gene Ontology	GO:0044249	31	5886	0.000999351	0.00637183	883|29969|338|210|124583|3293|1589|1582|6348|3172|26137|1112|283|189|5288|23743|23600|635|2938|718|4337|1956|6441|10243|23541|3158|1806|3429|3428|63875|1576
regulation of cell-cell adhesion	Gene Ontology	GO:0022407	6	375	0.001025	0.00652271	3119|8876|3117|6441|2244|2266
regulation of phosphate metabolic process	Gene Ontology	GO:0019220	13	1595	0.00105014	0.00660705	5618|2203|718|6348|1826|29969|64798|1956|2244|283|3172|2266|2690
negative regulation of protein metabolic process	Gene Ontology	GO:0051248	10	1018	0.0010503	0.00660705	12|718|64798|1956|720|6441|2|283|3172|3428
regulation of proteolysis	Gene Ontology	GO:0030162	8	675	0.00105424	0.00661794	3429|12|718|731|2|3075|720|3428
regulation of phosphorus metabolic process	Gene Ontology	GO:0051174	13	1596	0.00105605	0.00661794	5618|2203|718|6348|1826|29969|64798|1956|2244|283|3172|2266|2690
Golgi membrane	Gene Ontology	GO:0000139	8	676	0.0010641	0.00663739	10841|3119|3117|3105|3106|124583|1956|1571
positive regulation of cellular protein metabolic process	Gene Ontology	GO:0032270	12	1398	0.00106521	0.00663739	3429|3428|718|6348|5618|29969|1956|2244|283|3172|2266|2690
ERK1 and ERK2 cascade	Gene Ontology	GO:0070371	5	253	0.00109322	0.00676071	2244|6348|1956|2266|718
positive regulation of multicellular organismal process	Gene Ontology	GO:0051240	12	1407	0.00112455	0.00694143	3428|213|8876|6348|760|718|26137|1826|350|2244|2266|2690
regulation of peptidase activity	Gene Ontology	GO:0052547	6	385	0.00117018	0.00716923	3429|12|718|2|720|3428
heterocycle catabolic process	Gene Ontology	GO:0046700	6	386	0.00118552	0.00724972	883|1806|6999|83594|10840|53343
cell activation	Gene Ontology	GO:0001775	9	860	0.00121955	0.00741649	5618|3119|10537|3117|6348|8876|6441|2244|2266
negative regulation of hydrolase activity	Gene Ontology	GO:0051346	6	391	0.00126455	0.0076618	3428|718|12|720|2|10788
single organism signaling	Gene Ontology	GO:0044700	31	5972	0.00126931	0.00766884	29969|10537|760|124583|3172|2203|3105|3106|2|2244|1755|189|2266|5288|390439|718|5618|64798|1956|10788|3554|3429|3428|4680|3119|8876|3117|10982|6348|91584|2690
wound healing	Gene Ontology	GO:0042060	7	537	0.00127342	0.00766884	718|5624|2|350|2244|3172|2266
single organismal cell-cell adhesion	Gene Ontology	GO:0016337	8	696	0.00127736	0.00766884	5618|3119|8876|3117|1956|6441|2244|2266
signaling	Gene Ontology	GO:0023052	31	5978	0.00129034	0.00773265	29969|10537|760|124583|3172|2203|3105|3106|2|2244|1755|189|2266|5288|390439|718|5618|64798|1956|10788|3554|3429|3428|4680|3119|8876|3117|10982|6348|91584|2690
cell-cell adhesion	Gene Ontology	GO:0098609	9	872	0.00134025	0.00793063	5618|3119|8876|3117|1826|1956|6441|2244|2266
aromatic compound catabolic process	Gene Ontology	GO:0019439	6	398	0.00138189	0.00815204	883|1806|6999|83594|10840|53343
regulation of cellular protein metabolic process	Gene Ontology	GO:0032268	16	2295	0.00142727	0.00838518	3429|12|718|6348|5618|29969|64798|3428|1956|720|2244|2|283|3172|2266|2690
Golgi apparatus part	Gene Ontology	GO:0044431	9	886	0.00149308	0.00864832	10841|3119|3117|3105|3106|5624|124583|1956|1571
cellular response to nitrogen compound	Gene Ontology	GO:1901699	7	553	0.00150208	0.00868515	5618|1589|3158|760|1956|3172|2690
negative regulation of molecular function	Gene Ontology	GO:0044092	10	1072	0.00153622	0.00886698	12|718|3172|3240|64798|2|720|10788|1565|3428
organophosphate metabolic process	Gene Ontology	GO:0019637	10	1073	0.0015467	0.00890283	5288|6822|2203|54677|53343|4337|83594|1956|10243|2326
defense response to other organism	Gene Ontology	GO:0098542	7	556	0.00154831	0.00890283	3428|3240|140683|6441|2244|1755|283
alcohol metabolic process	Gene Ontology	GO:0006066	5	277	0.00161728	0.00918749	127|23541|3158|1576|338
mitochondrial matrix	Gene Ontology	GO:0005759	6	412	0.00164138	0.00929458	3158|53343|63875|10249|51218|189
positive regulation of hydrolase activity	Gene Ontology	GO:0051345	9	903	0.00169723	0.00956144	3429|3428|6348|1956|27147|350|2|283|10788
regulation of protein phosphorylation	Gene Ontology	GO:0001932	11	1281	0.00172002	0.00967325	5618|718|6348|29969|64798|1956|2244|283|3172|2266|2690
positive regulation of protein metabolic process	Gene Ontology	GO:0051247	12	1484	0.00175411	0.00984817	3429|3428|718|6348|5618|29969|1956|2244|283|3172|2266|2690
cell motility	Gene Ontology	GO:0048870	11	1288	0.00179426	0.00995467	338|4680|6348|91584|5624|6291|1956|350|6441|283|80781
localization of cell	Gene Ontology	GO:0051674	11	1288	0.00179426	0.00995467	338|4680|6348|91584|5624|6291|1956|350|6441|283|80781
regulation of protein transport	Gene Ontology	GO:0051223	8	740	0.0018669	0.010254	3429|6348|29969|1956|2244|283|3172|2266
regulation of vesicle-mediated transport	Gene Ontology	GO:0060627	6	423	0.00187004	0.010254	720|718|7018|6441|2244|2266
extracellular matrix	Gene Ontology	GO:0031012	6	423	0.00187004	0.010254	653509|213|350|6441|283|80781
single organism cell adhesion	Gene Ontology	GO:0098602	8	745	0.00194561	0.0104934	5618|3119|8876|3117|1956|6441|2244|2266
cellular component organization	Gene Ontology	GO:0016043	30	5863	0.00194861	0.0104934	338|210|10537|3778|7018|3172|2203|6348|91584|100506658|2|2244|283|2266|718|5618|64798|1956|6441|10243|10788|1645|10841|80036|1826|10982|63875|720|80781|7508
apical plasma membrane	Gene Ontology	GO:0016324	5	290	0.0019682	0.010512	11309|3778|100506658|7018|9962
movement of cell or subcellular component	Gene Ontology	GO:0006928	13	1715	0.00199058	0.0106143	1826|338|4680|8876|6348|91584|5624|6291|1956|350|6441|283|80781
positive regulation of cell communication	Gene Ontology	GO:0010647	12	1513	0.00205633	0.0109127	5618|718|6348|760|10537|124583|29969|1956|2244|3172|2266|2690
early endosome	Gene Ontology	GO:0005769	5	293	0.0020565	0.0109127	3105|3106|1956|338|7018
positive regulation of signaling	Gene Ontology	GO:0023056	12	1518	0.00211253	0.0111561	5618|718|6348|760|10537|124583|29969|1956|2244|3172|2266|2690
positive regulation of protein modification process	Gene Ontology	GO:0031401	10	1131	0.00226192	0.011831	5618|718|6348|29969|1956|2244|283|3172|2266|2690
enzyme binding	Gene Ontology	GO:0019899	13	1743	0.00228924	0.0119549	3554|338|213|1557|1755|60412|1956|2|1571|10788|1528|1576|2690
enzyme regulator activity	Gene Ontology	GO:0030234	9	949	0.00236393	0.0122671	5618|12|718|6348|1956|720|350|2|10788
macromolecule metabolic process	Gene Ontology	GO:0043170	40	8738	0.00237649	0.0123128	29969|213|635|10537|124583|338|6348|5624|731|26137|2|2244|1755|189|2266|412|718|4337|5618|64798|1956|3075|6441|10243|23541|3172|283|3428|653509|3429|12|414|63875|720|350|80781|7508|1112|290|2690
growth	Gene Ontology	GO:0040007	9	951	0.00239706	0.0123999	5618|2203|718|6414|91584|1826|1956|3172|2690
negative regulation of proteolysis	Gene Ontology	GO:0045861	5	304	0.00240519	0.0124224	3428|12|2|720|718
negative regulation of cellular protein metabolic process	Gene Ontology	GO:0032269	9	961	0.00256831	0.0131207	12|718|64798|1956|720|2|283|3172|3428
leukocyte differentiation	Gene Ontology	GO:0002521	6	454	0.00264515	0.0134506	3428|10537|6348|3106|8876|760
regulation of developmental process	Gene Ontology	GO:0050793	15	2217	0.00268886	0.0136098	5618|5624|338|8876|6348|3106|718|1826|350|2244|760|3172|2266|91584|2690
positive regulation of protein kinase activity	Gene Ontology	GO:0045860	6	459	0.00278984	0.0139492	5618|29969|1956|283|3172|2690
cellular component organization or biogenesis	Gene Ontology	GO:0071840	30	6012	0.00286534	0.0142833	338|210|10537|3778|7018|3172|2203|6348|91584|100506658|2|2244|283|2266|718|5618|64798|1956|6441|10243|10788|1645|10841|80036|1826|10982|63875|720|80781|7508
cellular response to endogenous stimulus	Gene Ontology	GO:0071495	10	1170	0.00287778	0.0143236	1645|5618|1589|338|3172|1956|2244|3158|760|2690
immune system development	Gene Ontology	GO:0002520	8	795	0.00288573	0.0143257	3428|8876|6348|3106|10537|51218|718|760
positive regulation of molecular function	Gene Ontology	GO:0044093	13	1791	0.00288691	0.0143257	3429|3428|6348|3172|5618|29969|1956|27147|350|2|283|10788|2690
regulation of growth	Gene Ontology	GO:0040008	7	629	0.00305802	0.0149939	2203|718|91584|1826|1956|3172|2690
response to lipopolysaccharide	Gene Ontology	GO:0032496	5	323	0.00310594	0.0151836	6348|3158|338|210|2326
multicellular organismal homeostasis	Gene Ontology	GO:0048871	5	323	0.00310594	0.0151836	760|12|213|7018|6441
organelle membrane	Gene Ontology	GO:0031090	16	2482	0.00311798	0.0152189	10841|3429|338|3119|3117|3105|3106|124583|63875|1956|7018|1571|3158|1528|1755|290
positive regulation of signal transduction	Gene Ontology	GO:0009967	11	1385	0.00312243	0.0152189	5618|718|6348|10537|124583|29969|1956|2244|3172|2266|2690
negative regulation of apoptotic process	Gene Ontology	GO:0043066	8	808	0.00318039	0.0153875	5618|213|8876|5624|1956|350|2244|2266
phospholipid binding	Gene Ontology	GO:0005543	5	327	0.00327042	0.0157998	5288|23541|10788|338|350
negative regulation of macromolecule metabolic process	Gene Ontology	GO:0010605	15	2269	0.0033389	0.0160599	3429|12|718|6348|29969|64798|26137|1956|720|6441|2|283|3172|1112|3428
regulation of establishment of protein localization	Gene Ontology	GO:0070201	8	815	0.00334849	0.0160825	3429|6348|29969|1956|2244|283|3172|2266
negative regulation of programmed cell death	Gene Ontology	GO:0043069	8	819	0.0034476	0.0164148	5618|213|8876|5624|1956|350|2244|2266
negative regulation of catalytic activity	Gene Ontology	GO:0043086	8	820	0.00347273	0.0164867	12|718|3240|64798|2|720|10788|3428
response to wounding	Gene Ontology	GO:0009611	7	646	0.0035328	0.0167236	718|5624|2|350|2244|3172|2266
macromolecular complex assembly	Gene Ontology	GO:0065003	12	1619	0.00354676	0.0167656	1645|80036|2203|338|210|2266|100506658|5618|2244|283|10788|7508
regulation of cellular component size	Gene Ontology	GO:0032535	5	335	0.00361807	0.0170437	91584|10788|3778|1826|64798
response to molecule of bacterial origin	Gene Ontology	GO:0002237	5	337	0.00370898	0.0173499	6348|3158|338|210|2326
blood vessel morphogenesis	Gene Ontology	GO:0048514	6	487	0.00371255	0.0173499	338|718|350|283|80781|290
cell adhesion	Gene Ontology	GO:0007155	11	1421	0.00378194	0.0176241	5618|3119|8876|3117|1826|1956|6441|2244|9235|80781|2266
positive regulation of kinase activity	Gene Ontology	GO:0033674	6	491	0.00386088	0.0179032	5618|29969|1956|283|3172|2690
regulation of MAPK cascade	Gene Ontology	GO:0043408	7	657	0.00386871	0.0179032	29969|718|6348|1956|2244|2266|2690
biological adhesion	Gene Ontology	GO:0022610	11	1428	0.0039223	0.0180481	5618|3119|8876|3117|1826|1956|6441|2244|9235|80781|2266
membrane protein complex	Gene Ontology	GO:0098796	9	1028	0.0039818	0.0182707	5288|3119|3117|3105|3106|3778|731|1956|7018
multi-organism cellular process	Gene Ontology	GO:0044764	9	1036	0.00418485	0.0190695	29969|3428|213|3105|3106|6348|1755|290|338
inorganic cation transmembrane transporter activity	Gene Ontology	GO:0022890	6	502	0.00429148	0.0195014	80036|9962|1528|3778|7018|10246
purine ribonucleotide metabolic process	Gene Ontology	GO:0009150	6	508	0.00454082	0.0204458	6822|2203|54677|53343|4337|10243
anatomical structure homeostasis	Gene Ontology	GO:0060249	5	354	0.00454904	0.0204458	760|12|213|7018|6441
proteinaceous extracellular matrix	Gene Ontology	GO:0005578	5	354	0.00454904	0.0204458	653509|283|80781|213|6441
leukocyte migration	Gene Ontology	GO:0050900	5	356	0.00465606	0.0208373	6348|5624|338|4680|6441
lysosome	Gene Ontology	GO:0005764	6	515	0.00484504	0.0215408	3119|3117|414|412|6441|290
lytic vacuole	Gene Ontology	GO:0000323	6	515	0.00484504	0.0215408	3119|3117|414|412|6441|290
symbiosis, encompassing mutualism through parasitism	Gene Ontology	GO:0044403	9	1062	0.00490135	0.0216963	29969|3428|213|3105|3106|6348|1755|290|338
interspecies interaction between organisms	Gene Ontology	GO:0044419	9	1062	0.00490135	0.0216963	29969|3428|213|3105|3106|6348|1755|290|338
transporter activity	Gene Ontology	GO:0005215	10	1265	0.00494852	0.0217655	653509|80036|338|10246|3778|11309|7018|9962|23541|1528
regulation of cell differentiation	Gene Ontology	GO:0045595	11	1484	0.00520183	0.0224687	5618|1826|338|8876|6348|3106|5624|2244|760|2266|91584
hydrolase activity	Gene Ontology	GO:0016787	15	2382	0.00520493	0.0224687	5624|760|2203|53343|718|8876|59084|124583|83594|414|720|283|3172|412|290
ribonucleotide metabolic process	Gene Ontology	GO:0009259	6	523	0.00521083	0.0224687	6822|2203|54677|53343|4337|10243
protein localization	Gene Ontology	GO:0008104	15	2383	0.00522461	0.0224987	3429|338|6348|29969|91828|60412|1956|27147|7018|2244|10243|1755|3172|2266|283
regulation of metabolic process	Gene Ontology	GO:0019222	29	5989	0.00527889	0.0227027	29969|1826|338|2203|6348|731|26137|2|2244|283|2266|1565|635|718|5618|64798|1956|3075|6441|23541|3172|3428|3429|12|3240|720|350|1112|2690
negative regulation of cell death	Gene Ontology	GO:0060548	8	881	0.00529551	0.0227444	5618|213|8876|5624|1956|350|2244|2266
enzyme inhibitor activity	Gene Ontology	GO:0004857	5	368	0.00533617	0.0228892	12|2|10788|720|718
leukocyte activation	Gene Ontology	GO:0045321	7	700	0.00541973	0.0230788	5618|3119|10537|3117|6348|8876|6441
purine nucleotide metabolic process	Gene Ontology	GO:0006163	6	528	0.00544951	0.0230788	6822|2203|54677|53343|4337|10243
negative regulation of immune system process	Gene Ontology	GO:0002683	5	370	0.005456	0.0230788	6441|6348|3106|2|3428
chemotaxis	Gene Ontology	GO:0006935	6	534	0.0057464	0.0240203	5288|6348|91584|1826|6291|6441
tissue development	Gene Ontology	GO:0009888	12	1723	0.00576189	0.0240203	1645|5618|80781|2938|6348|760|5624|60412|1956|412|1755|3158
substrate-specific transporter activity	Gene Ontology	GO:0022892	9	1090	0.00577634	0.0240203	653509|80036|338|10246|3778|11309|7018|9962|1528
hemopoiesis	Gene Ontology	GO:0030097	7	709	0.00579624	0.0240203	3428|10537|6348|3106|8876|51218|760
taxis	Gene Ontology	GO:0042330	6	535	0.00579701	0.0240203	5288|6348|91584|1826|6291|6441
positive regulation of cell adhesion	Gene Ontology	GO:0045785	5	377	0.0058904	0.0243766	3117|2244|2266|3119|8876
ribose phosphate metabolic process	Gene Ontology	GO:0019693	6	538	0.00595079	0.0245647	6822|2203|54677|53343|4337|10243
phosphorylation	Gene Ontology	GO:0016310	14	2190	0.00609491	0.0249402	5288|5618|2203|718|6348|1826|29969|64798|1956|2244|283|3172|2266|2690
protein homodimerization activity	Gene Ontology	GO:0042803	7	716	0.00610239	0.0249402	883|1806|5618|3172|283|189|2690
regulation of protein kinase activity	Gene Ontology	GO:0045859	7	716	0.00610239	0.0249402	5618|29969|64798|1956|283|3172|2690
regulation of protein secretion	Gene Ontology	GO:0050708	5	385	0.0064161	0.026125	2244|6348|283|3172|2266
behavior	Gene Ontology	GO:0007610	6	547	0.00643004	0.0261494	213|6414|1826|1956|412|6348
epithelial cell differentiation	Gene Ontology	GO:0030855	6	548	0.00648497	0.0263402	1645|5618|2938|5624|1755|80781
establishment of protein localization	Gene Ontology	GO:0045184	13	1977	0.00652618	0.0264749	3429|338|6348|29969|60412|1956|27147|7018|2244|1755|3172|2266|283
regulation of cell growth	Gene Ontology	GO:0001558	5	387	0.00655251	0.026549	3172|1956|2203|1826|91584
signaling receptor activity	Gene Ontology	GO:0038023	10	1322	0.00666615	0.0269762	390439|3554|3119|3117|91584|5618|1956|1755|3172|2690
response to steroid hormone	Gene Ontology	GO:0048545	5	390	0.00676092	0.0271925	189|3172|3158|210|718
cellular component assembly	Gene Ontology	GO:0022607	15	2458	0.00688338	0.0276512	1645|80036|2203|338|210|10537|2266|3172|1826|100506658|5618|2244|283|10788|7508
response to organic cyclic compound	Gene Ontology	GO:0014070	8	928	0.00714123	0.0284095	3158|210|718|6348|3172|1956|189|2690
regulation of cytokine production	Gene Ontology	GO:0001817	6	560	0.0071711	0.0284939	3428|718|6348|3106|26137|6441
plasma membrane region	Gene Ontology	GO:0098590	8	932	0.00731826	0.0290435	9962|760|3778|100506658|11309|1956|7018|10243
molecular function regulator	Gene Ontology	GO:0098772	10	1341	0.00733171	0.0290618	5618|12|718|6348|1956|27147|720|350|2|10788
regulation of protein localization	Gene Ontology	GO:0032880	8	938	0.00759	0.0299773	3429|6348|29969|1956|2244|283|3172|2266
apoptotic signaling pathway	Gene Ontology	GO:0097190	6	571	0.00784496	0.0308731	3429|3428|8876|64798|2244|2266
hematopoietic or lymphoid organ development	Gene Ontology	GO:0048534	7	753	0.0079257	0.0311253	3428|10537|6348|3106|8876|51218|760
positive regulation of developmental process	Gene Ontology	GO:0051094	9	1147	0.00792795	0.0311253	5624|338|8876|760|718|1826|2244|2266|2690
blood vessel development	Gene Ontology	GO:0001568	6	573	0.00797222	0.0312618	338|718|350|283|80781|290
protein complex biogenesis	Gene Ontology	GO:0070271	10	1365	0.00824493	0.0320257	1645|80036|2203|210|100506658|5618|2244|283|10788|2266
protein complex assembly	Gene Ontology	GO:0006461	10	1365	0.00824493	0.0320257	1645|80036|2203|210|100506658|5618|2244|283|10788|2266
anatomical structure morphogenesis	Gene Ontology	GO:0009653	15	2513	0.00835148	0.0323632	3172|338|718|6348|91584|1826|60412|1956|350|2244|283|80781|2266|760|290
metal ion transmembrane transporter activity	Gene Ontology	GO:0046873	5	412	0.00843332	0.0325653	80036|3778|10246|7018|9962
protein transport	Gene Ontology	GO:0015031	12	1813	0.00846595	0.0326147	3429|6348|29969|60412|1956|27147|7018|2244|1755|3172|2266|283
mitochondrial part	Gene Ontology	GO:0044429	8	958	0.00855112	0.0329043	3429|3158|53343|63875|10249|51218|189|1528
angiogenesis	Gene Ontology	GO:0001525	5	415	0.00868166	0.0333676	350|80781|283|290|718
protein complex subunit organization	Gene Ontology	GO:0071822	11	1596	0.00874402	0.0334121	1645|80036|2203|210|100506658|5618|63875|2244|283|10788|2266
regulation of kinase activity	Gene Ontology	GO:0043549	7	769	0.00882791	0.0335767	5618|29969|64798|1956|283|3172|2690
vasculature development	Gene Ontology	GO:0001944	6	593	0.00932798	0.0352748	338|718|350|283|80781|290
cation transmembrane transporter activity	Gene Ontology	GO:0008324	6	596	0.00954472	0.0360116	80036|9962|1528|3778|7018|10246
T cell activation	Gene Ontology	GO:0042110	5	427	0.00972577	0.0366107	3117|5618|6441|3119|8876
T cell aggregation	Gene Ontology	GO:0070489	5	427	0.00972577	0.0366107	3117|5618|6441|3119|8876
lymphocyte aggregation	Gene Ontology	GO:0071593	5	428	0.00981651	0.0369101	3117|5618|6441|3119|8876
ion transmembrane transporter activity	Gene Ontology	GO:0015075	7	793	0.01032	0.0384517	80036|9962|10246|3778|11309|7018|1528
positive regulation of cell death	Gene Ontology	GO:0010942	6	607	0.0103703	0.0385952	3429|3778|10537|6348|3240|80781
response to radiation	Gene Ontology	GO:0009314	5	435	0.010468	0.0388711	3554|1956|7508|210|3428
leukocyte aggregation	Gene Ontology	GO:0070486	5	435	0.010468	0.0388711	3117|5618|6441|3119|8876
regulation of protein modification process	Gene Ontology	GO:0031399	11	1641	0.0106074	0.0392998	5618|718|6348|29969|64798|1956|2244|283|3172|2266|2690
organic cyclic compound biosynthetic process	Gene Ontology	GO:1901362	22	4388	0.0108174	0.0399431	29969|338|210|3293|1589|1582|6348|26137|1112|283|23600|4337|5618|1956|10243|23541|3172|93517|3429|3428|3158|1576
regulation of anatomical structure morphogenesis	Gene Ontology	GO:0022603	8	1001	0.0109242	0.0402922	718|6348|91584|1826|350|2244|3172|2266
cytokine production	Gene Ontology	GO:0001816	6	619	0.0113275	0.0415933	3428|718|6348|3106|26137|6441
positive regulation of transferase activity	Gene Ontology	GO:0051347	6	620	0.01141	0.0416968	5618|29969|1956|283|3172|2690
signal transducer activity	Gene Ontology	GO:0004871	11	1662	0.0115754	0.0420768	390439|3554|5618|3119|3117|91584|124583|1956|1755|3172|2690
regulation of multicellular organismal development	Gene Ontology	GO:2000026	11	1666	0.0117672	0.0425998	5618|5624|8876|6348|3106|718|1826|350|760|3172|91584
positive regulation of cell differentiation	Gene Ontology	GO:0045597	7	814	0.01177	0.0425998	5624|338|8876|760|1826|2244|2266
positive regulation of protein transport	Gene Ontology	GO:0051222	5	454	0.0123847	0.0443851	2244|6348|283|1956|2266
system process	Gene Ontology	GO:0003008	12	1918	0.0127843	0.0455691	1645|80036|12|6348|3778|390439|1956|412|2244|80781|2266|290
viral process	Gene Ontology	GO:0016032	8	1032	0.0129161	0.0459892	29969|3428|338|3105|3106|6348|1755|290
epithelium development	Gene Ontology	GO:0060429	8	1042	0.0136123	0.0478466	1645|5618|2938|760|5624|1956|1755|80781
regulation of signal transduction	Gene Ontology	GO:0009966	15	2663	0.0136576	0.0479547	5618|2203|718|6348|8876|124583|29969|64798|1956|2|2266|2244|3172|10537|2690
leukocyte cell-cell adhesion	Gene Ontology	GO:0007159	5	466	0.0137107	0.0480898	3117|5618|6441|3119|8876
protein secretion	Gene Ontology	GO:0009306	5	469	0.0140566	0.0491981	2244|6348|283|3172|2266
enzyme activator activity	Gene Ontology	GO:0008047	5	471	0.0142904	0.0499633	6348|5618|2|10788|350
--------------------

## Sheet: bone
#Term	Database	ID	Input number	Background number	P-Value	Corrected P-Value	Input
immune system process	Gene Ontology	GO:0002376	36	2414	5.73094e-23	1.50265e-19	102725035|100049587|338339|100131439|4780|3384|4680|3105|3106|146722|29121|161882|163351|1755|51119|26279|4312|124599|10077|718|57126|948|91662|28984|10394|11314|922|100423062|3119|2040|3117|5788|945|5420|353514|6318
regulation of immune system process	Gene Ontology	GO:0002682	25	1372	1.37945e-17	1.21486e-14	102725035|338339|100131439|4780|3384|3105|3106|146722|29121|161882|1755|5788|26279|124599|10077|718|948|28984|11314|100423062|3119|2040|3117|945|6318
cell part	Gene Ontology	GO:0044464	68	15776	2.09597e-17	1.21486e-14	9263|8501|102725035|84889|100049587|338339|100131439|161882|3482|10257|4780|6006|3384|7846|2887|353514|6415|3105|3106|718|146722|63923|57591|51119|3857|6202|1755|1291|5788|6583|29121|1058|124599|7390|10077|160365|60559|948|50865|2766|91662|55146|28984|326624|6443|3117|7127|23541|11314|922|6710|100423062|3119|2040|10562|57126|348235|945|91663|5420|55635|8859|1009|4680|63929|6318|55062|7508
response to stimulus	Gene Ontology	GO:0050896	51	8081	2.13147e-17	1.21486e-14	9263|102725035|100049587|338339|100131439|161882|4780|3384|2887|353514|6415|3105|3106|146722|29121|57591|84889|163351|1755|1291|5788|26279|124599|7390|10077|718|57126|948|3482|2766|28984|326624|10394|11314|922|6710|100423062|3119|2040|3117|51119|945|91663|91662|55635|6039|4680|6318|55062|7508|51316
cell	Gene Ontology	GO:0005623	68	15802	2.31667e-17	1.21486e-14	9263|8501|102725035|84889|100049587|338339|100131439|161882|3482|10257|4780|6006|3384|7846|2887|353514|6415|3105|3106|718|146722|63923|57591|51119|3857|6202|1755|1291|5788|6583|29121|1058|124599|7390|10077|160365|60559|948|50865|2766|91662|55146|28984|326624|6443|3117|7127|23541|11314|922|6710|100423062|3119|2040|10562|57126|348235|945|91663|5420|55635|8859|1009|4680|63929|6318|55062|7508
cell periphery	Gene Ontology	GO:0071944	41	4962	3.65463e-17	1.59708e-14	8501|102725035|100049587|338339|100131439|10257|4780|6006|3384|2887|3105|3106|718|146722|29121|84889|1291|5788|6583|124599|10077|160365|57126|948|3482|10562|6443|7127|11314|6710|100423062|3119|2040|3117|945|91663|5420|353514|1009|4680|7508
immune response	Gene Ontology	GO:0006955	25	1474	7.10516e-17	2.66139e-14	102725035|100049587|338339|100131439|3384|3105|3106|146722|161882|163351|1755|5788|124599|718|948|28984|10394|11314|100423062|29121|3119|3117|945|353514|6318
membrane-bounded vesicle	Gene Ontology	GO:0031988	35	3520	9.98047e-17	3.2711e-14	10257|3384|11314|3105|3106|3857|6202|163351|1755|1291|5788|3482|718|57126|948|50865|10562|326624|23541|7846|922|100423062|2040|3119|3117|945|91663|5420|353514|6039|1009|63929|6318|55062|7508
plasma membrane	Gene Ontology	GO:0005886	40	4859	1.30678e-16	3.80709e-14	8501|102725035|100049587|338339|100131439|10257|4780|6006|3384|2887|3105|3106|718|146722|29121|84889|1291|5788|6583|124599|10077|160365|57126|948|3482|10562|6443|11314|6710|100423062|3119|2040|3117|945|91663|5420|353514|1009|4680|7508
defense response	Gene Ontology	GO:0006952	25	1535	1.78783e-16	4.68769e-14	102725035|100049587|338339|4780|3384|3105|3106|163351|1755|5788|26279|124599|10077|718|948|6318|100423062|3119|2040|3117|91662|353514|6039|922|51316
single-organism process	Gene Ontology	GO:0044699	61	12728	2.2053e-16	5.25662e-14	9263|8501|102725035|338339|51119|161882|727830|10257|4780|6006|3384|7846|2887|1058|3105|3106|84889|29121|57591|3857|6202|1755|1291|5788|26279|6583|4312|7390|10077|718|57126|948|3482|2766|91662|10562|28984|326624|10394|6443|7127|23541|11314|922|6710|100423062|3119|2040|3117|348235|945|91663|5420|55635|63923|1009|4680|6318|55062|7508|51316
vesicle	Gene Ontology	GO:0031982	35	3652	3.08066e-16	6.73124e-14	10257|3384|11314|3105|3106|3857|6202|163351|1755|1291|5788|3482|718|57126|948|50865|10562|326624|23541|7846|922|100423062|2040|3119|3117|945|91663|5420|353514|6039|1009|63929|6318|55062|7508
binding	Gene Ontology	GO:0005488	63	13918	5.16057e-16	1.04085e-13	9263|102725035|100049587|338339|100131439|161882|29121|10257|4780|9911|3384|7846|2887|1058|3105|3106|718|63923|57591|51119|6039|6202|163351|1755|1291|5788|26279|6583|4312|3482|7390|160365|57126|948|50865|2766|91662|55146|28984|326624|10394|7127|23541|11314|284194|6710|100423062|3119|2040|10562|3117|348235|945|5420|55635|8859|1009|4680|63929|6318|55062|7508|51316
cellular process	Gene Ontology	GO:0009987	64	14647	1.18297e-15	2.21553e-13	9263|102725035|338339|51119|161882|29121|727830|10257|4780|3384|7846|2887|6415|3105|3106|84889|63923|57591|3857|6202|163351|1755|1291|5788|26279|6583|4312|1058|7390|10077|718|60559|948|3482|2766|91662|10562|28984|326624|10394|6443|3117|7127|23541|11314|922|6710|100423062|6039|3119|2040|57126|348235|945|91663|5420|55635|8859|1009|4680|6318|55062|7508|51316
single-organism cellular process	Gene Ontology	GO:0044763	57	11494	2.60119e-15	4.54687e-13	9263|102725035|338339|51119|161882|727830|10257|4780|3384|7846|2887|1058|3105|3106|84889|29121|57591|3857|6202|1755|1291|5788|26279|6583|4312|7390|10077|718|57126|948|3482|2766|91662|10562|28984|326624|10394|6443|7127|11314|6710|100423062|3119|2040|3117|348235|945|91663|5420|55635|63923|1009|4680|922|55062|7508|51316
regulation of immune response	Gene Ontology	GO:0050776	19	824	3.36844e-15	5.52003e-13	3384|100423062|124599|29121|3119|718|3117|3105|3106|945|146722|338339|28984|100131439|948|6318|11314|5788|1755
extracellular region part	Gene Ontology	GO:0044421	34	3743	4.87871e-15	7.5247e-13	3384|11314|3105|3106|6039|3857|6202|163351|1755|1291|5788|4312|3482|718|57126|948|50865|10562|7127|23541|7846|922|100423062|4680|2040|945|91663|5420|353514|63923|1009|63929|6318|7508
membrane	Gene Ontology	GO:0016020	50	8805	5.54095e-15	8.07131e-13	8501|102725035|100049587|338339|100131439|727830|10257|4780|6006|3384|2887|3105|3106|718|146722|29121|3857|6202|1755|1291|5788|6583|9911|124599|3117|10077|160365|60559|948|3482|10562|55062|6443|23541|11314|922|6710|100423062|3119|2040|57126|945|91663|5420|353514|1009|4680|55146|84889|7508
extracellular region	Gene Ontology	GO:0005576	36	4424	1.50106e-14	2.07146e-12	3384|7846|3105|3106|6039|3857|6202|163351|1755|1291|5788|26279|4312|3482|718|57126|948|50865|10562|10394|7127|23541|11314|922|100423062|4680|2040|945|91663|5420|353514|63923|1009|63929|6318|7508
extracellular exosome	Gene Ontology	GO:0070062	29	2738	2.40008e-14	3.1465e-12	3384|11314|3105|3106|3857|6202|163351|1755|1291|5788|3482|718|57126|50865|10562|23541|7846|922|100423062|2040|945|91663|5420|353514|6039|1009|63929|6318|7508
extracellular vesicle	Gene Ontology	GO:1903561	29	2751	2.70548e-14	3.2542e-12	3384|11314|3105|3106|3857|6202|163351|1755|1291|5788|3482|718|57126|50865|10562|23541|7846|922|100423062|2040|945|91663|5420|353514|6039|1009|63929|6318|7508
extracellular organelle	Gene Ontology	GO:0043230	29	2752	2.73045e-14	3.2542e-12	3384|11314|3105|3106|3857|6202|163351|1755|1291|5788|3482|718|57126|50865|10562|23541|7846|922|100423062|2040|945|91663|5420|353514|6039|1009|63929|6318|7508
intrinsic component of membrane	Gene Ontology	GO:0031224	38	5355	1.44511e-13	1.64742e-11	8501|102725035|100049587|338339|100131439|727830|10257|6006|3384|4680|3105|3106|146722|29121|57126|5788|6583|9911|124599|10077|160365|60559|948|3482|6443|23541|11314|6710|3119|2040|3117|945|91663|5420|353514|1009|55146|84889
membrane part	Gene Ontology	GO:0044425	41	6452	3.3303e-13	3.63835e-11	8501|102725035|100049587|338339|100131439|727830|10257|6006|3384|4680|3105|3106|146722|29121|57126|1755|5788|6583|9911|124599|10077|160365|60559|948|3482|55062|6443|23541|11314|6710|100423062|3119|2040|3117|945|91663|5420|353514|1009|55146|84889
response to stress	Gene Ontology	GO:0006950	31	3660	8.39444e-13	8.80409e-11	102725035|100049587|338339|4780|3384|3105|3106|161882|163351|1755|5788|26279|124599|10077|718|57126|948|2766|28984|55062|922|100423062|3119|2040|3117|91662|353514|6039|6318|7508|51316
integral component of membrane	Gene Ontology	GO:0016021	36	5233	2.37299e-12	2.39307e-10	8501|102725035|100049587|338339|100131439|727830|10257|6006|3384|4680|3105|3106|146722|29121|84889|5788|6583|9911|124599|10077|160365|60559|948|3482|6443|23541|11314|3119|2040|3117|945|91663|5420|353514|1009|55146
immune effector process	Gene Ontology	GO:0002252	15	763	3.39616e-11	3.29805e-09	2040|100423062|948|10077|3119|718|3105|3106|161882|338339|28984|6318|11314|5788|1755
cell adhesion	Gene Ontology	GO:0007155	19	1421	4.00531e-11	3.75069e-09	3384|11314|948|10077|3119|5420|3117|100049587|945|91663|63923|161882|338339|10562|28984|1009|1291|5788|26279
biological adhesion	Gene Ontology	GO:0022610	19	1428	4.34932e-11	3.9104e-09	3384|11314|948|10077|3119|5420|3117|100049587|945|91663|63923|161882|338339|10562|28984|1009|1291|5788|26279
intrinsic component of plasma membrane	Gene Ontology	GO:0031226	20	1619	4.47415e-11	3.9104e-09	6006|8501|3384|29121|948|2040|10077|3117|3105|3106|945|5420|84889|3482|6443|4680|102725035|5788|6583|6710
innate immune response	Gene Ontology	GO:0045087	15	798	6.2658e-11	5.29966e-09	3384|100423062|124599|948|3119|718|3117|100049587|3106|163351|338339|353514|3105|6318|1755
integral component of plasma membrane	Gene Ontology	GO:0005887	19	1562	1.93956e-10	1.58923e-08	6006|8501|3384|29121|948|2040|10077|3117|3105|3106|945|5420|84889|3482|6443|4680|102725035|5788|6583
plasma membrane part	Gene Ontology	GO:0044459	23	2516	4.28314e-10	3.40315e-08	8501|102725035|3119|10257|6006|3384|3105|3106|29121|5788|6583|10077|84889|948|3482|6443|6710|100423062|2040|4680|3117|945|5420
regulation of response to stimulus	Gene Ontology	GO:0048583	27	3560	5.10784e-10	3.93905e-08	338339|100131439|4780|3384|2887|3105|3106|146722|29121|57591|1755|5788|124599|10077|718|84889|948|28984|11314|100423062|3119|2040|3117|945|91663|91662|6318
organelle	Gene Ontology	GO:0043226	52	12692	7.02409e-10	5.26205e-08	9263|51119|161882|10257|4780|3384|7846|353514|1058|3105|3106|6039|57591|3857|6202|163351|1755|1291|5788|6583|29121|3482|7390|3117|718|60559|948|50865|55146|28984|326624|6443|23541|11314|922|6710|100423062|2040|3119|10562|57126|348235|945|91663|5420|55635|8859|1009|63929|6318|55062|7508
localization	Gene Ontology	GO:0051179	33	5581	1.73823e-09	1.26601e-07	8501|91662|10257|4780|6006|11314|2887|1058|84889|6202|1755|51119|6583|4312|718|57126|948|3482|28984|326624|7127|23541|7846|6710|100423062|4680|2040|5788|91663|5420|63923|922|55062
membrane-bounded organelle	Gene Ontology	GO:0043227	49	11806	2.85843e-09	2.02562e-07	9263|161882|10257|4780|3384|7846|353514|1058|3105|3106|6039|57591|3857|6202|163351|1755|1291|5788|6583|29121|3482|7390|3117|718|60559|948|50865|55146|28984|326624|23541|11314|922|100423062|2040|3119|10562|57126|51119|945|91663|5420|55635|8859|1009|63929|6318|55062|7508
single organism cell adhesion	Gene Ontology	GO:0098602	13	745	3.22107e-09	2.22254e-07	3384|10077|3119|3117|91663|5420|161882|338339|10562|28984|11314|5788|26279
cellular response to stimulus	Gene Ontology	GO:0051716	36	6741	3.31936e-09	2.23163e-07	9263|102725035|338339|4780|3384|2887|3105|3106|29121|57591|163351|1755|1291|51119|7390|10077|718|84889|948|3482|28984|326624|11314|6710|100423062|3119|2040|3117|5788|945|91663|91662|55635|4680|55062|7508
positive regulation of immune response	Gene Ontology	GO:0050778	12	609	3.66681e-09	2.40359e-07	3384|100423062|948|3119|718|3117|3105|338339|28984|1755|11314|5788
activation of immune response	Gene Ontology	GO:0002253	11	480	3.7905e-09	2.42407e-07	3384|100423062|948|3119|718|3117|338339|28984|1755|11314|5788
biological regulation	Gene Ontology	GO:0065007	47	11110	4.83032e-09	3.0155e-07	9263|102725035|338339|100131439|161882|4780|3384|2887|3105|3106|146722|29121|57591|84889|1755|5788|26279|6583|4312|124599|10077|718|57126|948|3482|91662|10562|28984|326624|10394|23541|11314|6710|100423062|3119|2040|3117|348235|945|91663|5420|55635|4680|6318|55062|7508|51316
regulation of biological process	Gene Ontology	GO:0050789	45	10509	1.03477e-08	6.30972e-07	9263|102725035|338339|100131439|161882|4780|3384|2887|3105|3106|146722|29121|57591|1755|5788|26279|4312|124599|10077|718|84889|948|3482|91662|10562|28984|326624|10394|23541|11314|6710|100423062|3119|2040|3117|348235|945|91663|5420|55635|4680|6318|55062|7508|51316
single organismal cell-cell adhesion	Gene Ontology	GO:0016337	12	696	1.56349e-08	9.31698e-07	3384|10077|3119|3117|91663|5420|161882|338339|28984|11314|5788|26279
cell-cell adhesion	Gene Ontology	GO:0098609	13	872	2.00946e-08	1.17084e-06	3384|10077|3119|3117|91663|5420|161882|338339|28984|1009|11314|5788|26279
signal transduction	Gene Ontology	GO:0007165	31	5542	2.6441e-08	1.50714e-06	9263|102725035|338339|4780|3384|2887|3105|3106|29121|57591|1755|5788|10077|718|84889|948|3482|28984|326624|11314|6710|100423062|3119|2040|3117|945|91663|91662|55635|4680|55062
carbohydrate binding	Gene Ontology	GO:0030246	8	256	5.81125e-08	3.17439e-06	3482|29121|160365|100049587|945|338339|10394|284194
negative regulation of immune system process	Gene Ontology	GO:0002683	9	370	6.64686e-08	3.55675e-06	102725035|10077|4780|3106|161882|6318|11314|5788|26279
regulation of cellular process	Gene Ontology	GO:0050794	42	9997	9.75664e-08	5.11638e-06	9263|102725035|338339|161882|4780|3384|2887|3105|3106|29121|57591|1755|5788|26279|4312|10077|718|84889|948|3482|91662|10562|28984|326624|10394|23541|11314|6710|100423062|3119|2040|3117|348235|945|91663|5420|55635|4680|6318|55062|7508|51316
establishment of localization	Gene Ontology	GO:0051234	27	4583	1.10814e-07	5.69713e-06	8501|10257|4780|6006|11314|2887|1058|6202|1755|5788|6583|718|84889|3482|28984|100423062|7127|23541|7846|6710|55062|948|2040|91663|91662|326624|922
cytoplasm	Gene Ontology	GO:0005737	43	10469	1.15724e-07	5.83514e-06	91662|161882|10257|4780|2887|6415|3105|3106|29121|57591|6202|1755|1291|51119|6583|3482|7390|60559|948|50865|2766|55146|28984|326624|6443|7127|23541|7846|922|6710|55062|3119|2040|10562|3117|348235|91663|5420|1058|1009|63929|6318|7508
leukocyte mediated immunity	Gene Ontology	GO:0002443	8	282	1.19375e-07	5.90568e-06	100423062|3119|718|3105|3106|6318|11314|5788
single organism signaling	Gene Ontology	GO:0044700	31	5972	1.49445e-07	7.25637e-06	9263|102725035|338339|4780|3384|2887|3105|3106|29121|57591|1755|5788|10077|718|84889|948|3482|28984|326624|11314|6710|100423062|3119|2040|3117|945|91663|91662|55635|4680|55062
signaling	Gene Ontology	GO:0023052	31	5978	1.52912e-07	7.28973e-06	9263|102725035|338339|4780|3384|2887|3105|3106|29121|57591|1755|5788|10077|718|84889|948|3482|28984|326624|11314|6710|100423062|3119|2040|3117|945|91663|91662|55635|4680|55062
side of membrane	Gene Ontology	GO:0098552	9	412	1.61673e-07	7.56976e-06	100423062|948|3119|3117|3105|3106|945|5788|6710
cell communication	Gene Ontology	GO:0007154	31	6000	1.66282e-07	7.64897e-06	9263|102725035|338339|4780|3384|2887|3105|3106|29121|57591|1755|5788|10077|718|84889|948|3482|28984|326624|11314|6710|100423062|3119|2040|3117|945|91663|91662|55635|4680|55062
positive regulation of immune system process	Gene Ontology	GO:0002684	12	879	1.88725e-07	8.41751e-06	3384|100423062|948|3119|718|3117|3105|338339|28984|1755|11314|5788
regulation of immune effector process	Gene Ontology	GO:0002697	9	420	1.8941e-07	8.41751e-06	948|2040|10077|718|3105|3106|6318|11314|5788
immune response-activating signal transduction	Gene Ontology	GO:0002757	9	424	2.04768e-07	8.80169e-06	3384|100423062|948|3119|3117|338339|1755|11314|5788
cell surface	Gene Ontology	GO:0009986	11	726	2.32752e-07	9.84317e-06	3482|100423062|948|29121|10077|3105|3106|945|63923|5788|6710
transport	Gene Ontology	GO:0006810	26	4456	2.53845e-07	1.05648e-05	8501|10257|4780|6006|11314|2887|6202|1755|5788|6583|718|84889|3482|28984|100423062|7127|23541|7846|6710|55062|948|2040|91663|91662|326624|922
lymphocyte mediated immunity	Gene Ontology	GO:0002449	7	214	3.03592e-07	1.24378e-05	100423062|3119|718|3105|3106|6318|5788
immune response-regulating signaling pathway	Gene Ontology	GO:0002764	9	456	3.71887e-07	1.4765e-05	3384|100423062|948|3119|3117|338339|1755|11314|5788
whole membrane	Gene Ontology	GO:0098805	14	1344	4.20184e-07	1.62018e-05	55062|948|2040|3119|3117|3105|3106|3482|91663|5420|1755|1291|5788|10257
regulation of cell adhesion	Gene Ontology	GO:0030155	10	629	5.60346e-07	2.07107e-05	948|3119|3117|91663|5420|10562|28984|11314|5788|26279
intracellular	Gene Ontology	GO:0005622	49	13775	6.58165e-07	2.36398e-05	9263|91662|51119|161882|10257|4780|2887|6415|3105|3106|29121|57591|3857|6202|1755|1291|5788|6583|3482|1058|7390|10077|60559|948|50865|2766|55146|28984|326624|6443|7127|23541|7846|922|6710|55062|3119|2040|10562|3117|348235|91663|5420|55635|8859|1009|63929|6318|7508
regulation of leukocyte mediated immunity	Gene Ontology	GO:0002703	6	150	7.18562e-07	2.54604e-05	718|3105|3106|6318|11314|5788
antigen binding	Gene Ontology	GO:0003823	5	80	7.81213e-07	2.73112e-05	3117|3105|3106|100423062|3119
endocytic vesicle membrane	Gene Ontology	GO:0030666	6	153	8.0327e-07	2.77128e-05	3119|948|3117|3105|3106|1755
positive regulation of biological process	Gene Ontology	GO:0048518	27	5067	8.3583e-07	2.84616e-05	9263|338339|161882|4780|3384|11314|2887|3105|57591|1755|5788|4312|718|948|3482|10562|28984|10394|23541|91662|100423062|3119|2040|3117|91663|5420|51316
cell differentiation	Gene Ontology	GO:0030154	22	3519	9.24947e-07	3.07611e-05	102725035|338339|161882|727830|4780|3106|57591|1755|1291|5788|26279|10562|28984|6443|7127|6710|948|91663|5420|63923|1009|51316
endocytic vesicle	Gene Ontology	GO:0030139	7	254	9.26823e-07	3.07611e-05	948|3119|3117|3105|3106|3482|1755
regulation of cell-cell adhesion	Gene Ontology	GO:0022407	8	375	9.76286e-07	3.19978e-05	3119|3117|91663|5420|28984|11314|5788|26279
cellular developmental process	Gene Ontology	GO:0048869	23	3837	1.00365e-06	3.24887e-05	102725035|338339|161882|727830|10257|4780|3106|57591|1755|1291|5788|26279|10562|28984|6443|7127|6710|948|91663|5420|63923|1009|51316
cell activation	Gene Ontology	GO:0001775	11	860	1.19683e-06	3.82693e-05	100423062|10077|3119|3117|161882|338339|28984|10394|11314|5788|26279
leukocyte activation	Gene Ontology	GO:0045321	10	700	1.44624e-06	4.56872e-05	100423062|10077|3119|3117|161882|338339|10394|11314|5788|26279
protein binding	Gene Ontology	GO:0005515	41	10621	1.80303e-06	5.56182e-05	102725035|338339|100131439|161882|4780|9911|3384|7846|2887|1058|3105|3106|718|57591|284194|1291|51119|6583|5788|57126|948|3482|91662|10562|28984|326624|7127|11314|1755|6710|100423062|4680|2040|348235|945|5420|55635|63923|6318|55062|7508
defense response to other organism	Gene Ontology	GO:0098542	9	556	1.85715e-06	5.66216e-05	100423062|2040|10077|948|338339|163351|1755|5788|51316
extracellular space	Gene Ontology	GO:0005615	13	1330	2.28935e-06	6.82121e-05	100423062|4680|2040|718|948|3482|5420|10562|3857|922|7127|6318|1755
immune response-activating cell surface receptor signaling pathway	Gene Ontology	GO:0002429	7	295	2.43909e-06	7.18571e-05	3384|100423062|3119|3117|338339|11314|5788
intracellular part	Gene Ontology	GO:0044424	47	13428	2.63188e-06	7.5833e-05	9263|91662|161882|10257|4780|2887|6415|3105|3106|29121|57591|3857|6202|1755|1291|51119|6583|3482|1058|7390|60559|948|50865|2766|55146|28984|326624|6443|7127|23541|7846|922|6710|55062|3119|2040|10562|3117|348235|91663|5420|55635|8859|1009|63929|6318|7508
regulation of defense response	Gene Ontology	GO:0031347	10	756	2.84057e-06	8.09563e-05	3384|2040|10077|718|948|3106|91662|338339|6318|1755
multi-organism process	Gene Ontology	GO:0051704	17	2352	3.19795e-06	9.01616e-05	4312|100423062|948|2040|10077|1058|3105|3106|3482|338339|3857|6202|163351|727830|1755|5788|51316
cytoplasmic, membrane-bounded vesicle	Gene Ontology	GO:0016023	12	1159	3.28294e-06	9.15731e-05	55062|948|2040|3119|3117|3105|3106|3482|10562|326624|1755|10257
response to external stimulus	Gene Ontology	GO:0009605	16	2106	3.50408e-06	9.57052e-05	100423062|948|2040|10077|718|5788|163351|91662|338339|51119|3105|1755|7508|51316|6710|4780
single-multicellular organism process	Gene Ontology	GO:0044707	28	5822	3.73555e-06	0.000100975	102725035|338339|4780|3106|161882|3857|1755|1291|51119|26279|4312|10077|718|57126|3482|28984|10394|6443|7127|91662|6710|948|5788|91663|5420|63923|1009|51316
regulation of lymphocyte mediated immunity	Gene Ontology	GO:0002706	5	115	4.29985e-06	0.000115043	3105|6318|5788|3106|718
immune response-regulating cell surface receptor signaling pathway	Gene Ontology	GO:0002768	7	326	4.63293e-06	0.000122703	3384|100423062|3119|3117|338339|11314|5788
positive regulation of response to stimulus	Gene Ontology	GO:0048584	15	1903	4.79348e-06	0.000125685	3384|100423062|948|2887|3119|718|3117|3105|91662|338339|28984|1755|11314|5788|4780
adaptive immune response	Gene Ontology	GO:0002250	7	337	5.72785e-06	0.00014581	100423062|3119|102725035|718|3105|338339|5788
single-organism developmental process	Gene Ontology	GO:0044767	27	5604	5.85469e-06	0.000147606	102725035|338339|161882|727830|10257|4780|3106|57591|3857|1755|1291|51119|26279|718|3482|10562|28984|6443|7127|6710|948|5788|91663|5420|63923|1009|51316
negative regulation of cell adhesion	Gene Ontology	GO:0007162	6	220	6.13589e-06	0.000151777	91663|5420|28984|11314|5788|26279
defense response to bacterium	Gene Ontology	GO:0042742	6	226	7.1257e-06	0.000172996	100423062|948|338339|163351|1755|51316
cytoplasmic vesicle	Gene Ontology	GO:0031410	12	1258	7.46972e-06	0.000179684	55062|948|2040|3119|3117|3105|3106|3482|10562|326624|1755|10257
intracellular vesicle	Gene Ontology	GO:0097708	12	1260	7.58874e-06	0.000180888	55062|948|2040|3119|3117|3105|3106|3482|10562|326624|1755|10257
developmental process	Gene Ontology	GO:0032502	27	5693	7.87529e-06	0.000183832	102725035|338339|161882|727830|10257|4780|3106|57591|3857|1755|1291|51119|26279|718|3482|10562|28984|6443|7127|6710|948|5788|91663|5420|63923|1009|51316
multicellular organismal process	Gene Ontology	GO:0032501	30	6781	7.89643e-06	0.000183832	102725035|338339|727830|4780|3106|161882|3857|1755|1291|51119|26279|4312|10077|718|57126|3482|28984|10394|6443|7127|91662|6710|948|5788|91663|5420|63923|1009|63929|51316
negative regulation of cell-cell adhesion	Gene Ontology	GO:0022408	5	131	7.9226e-06	0.000183832	28984|11314|91663|5420|26279
leukocyte migration	Gene Ontology	GO:0050900	7	356	8.12442e-06	0.000186862	4312|4680|57126|5420|91662|11314|51119
coated vesicle	Gene Ontology	GO:0030135	6	232	8.24129e-06	0.000187114	55062|3119|3117|3105|3106|3482
cellular response to interferon-gamma	Gene Ontology	GO:0071346	5	138	1.01101e-05	0.00022465	3117|3105|3106|3119|163351
single-organism localization	Gene Ontology	GO:1902578	18	2861	1.05636e-05	0.000232755	8501|6583|100423062|2887|2040|718|84889|948|91663|91662|1058|28984|6202|7127|11314|5788|10257|4780
positive regulation of cell adhesion	Gene Ontology	GO:0045785	7	377	1.16881e-05	0.000255384	3119|948|3117|91663|5420|10562|5788
response to other organism	Gene Ontology	GO:0051707	10	910	1.40334e-05	0.000301603	100423062|948|2040|10077|3105|338339|163351|1755|5788|51316
response to external biotic stimulus	Gene Ontology	GO:0043207	10	910	1.40334e-05	0.000301603	100423062|948|2040|10077|3105|338339|163351|1755|5788|51316
negative regulation of biological process	Gene Ontology	GO:0048519	23	4494	1.42719e-05	0.000304234	102725035|91662|161882|4780|2887|3106|57591|5788|26279|10077|718|28984|10394|11314|6710|948|945|91663|5420|55635|6318|7508|51316
negative regulation of cellular process	Gene Ontology	GO:0048523	22	4171	1.45957e-05	0.000308629	102725035|91662|161882|4780|2887|57591|5788|26279|10077|718|28984|10394|11314|6710|948|945|91663|5420|55635|6318|7508|51316
single-organism transport	Gene Ontology	GO:0044765	17	2654	1.55423e-05	0.000325422	8501|6583|100423062|2887|2040|718|84889|948|91663|91662|28984|6202|7127|11314|5788|10257|4780
positive regulation of cellular process	Gene Ontology	GO:0048522	23	4559	1.80111e-05	0.000371852	9263|3119|91662|161882|4780|2887|57591|5788|4312|718|3482|10562|28984|10394|23541|11314|100423062|2040|948|3117|91663|5420|51316
response to biotic stimulus	Gene Ontology	GO:0009607	10	946	1.94914e-05	0.000399269	100423062|948|2040|10077|3105|338339|163351|1755|5788|51316
response to interferon-gamma	Gene Ontology	GO:0034341	5	160	2.01779e-05	0.000410128	3117|3105|3106|3119|163351
antigen processing and presentation of exogenous peptide antigen	Gene Ontology	GO:0002478	5	161	2.07725e-05	0.000418965	3117|3105|3106|948|3119
cell migration	Gene Ontology	GO:0016477	11	1177	2.23978e-05	0.000444903	4312|4680|57126|5788|91663|63923|5420|91662|28984|11314|51119
anatomical structure development	Gene Ontology	GO:0048856	25	5313	2.26319e-05	0.000446172	102725035|338339|161882|10257|4780|3106|57591|3857|1755|1291|51119|26279|718|3482|10562|28984|6443|7127|6710|948|5788|91663|5420|63923|1009
antigen processing and presentation of exogenous antigen	Gene Ontology	GO:0019884	5	168	2.53259e-05	0.000493634	3117|3105|3106|948|3119
T cell activation	Gene Ontology	GO:0042110	7	427	2.56042e-05	0.000493634	3119|3117|161882|338339|11314|5788|26279
T cell aggregation	Gene Ontology	GO:0070489	7	427	2.56042e-05	0.000493634	3119|3117|161882|338339|11314|5788|26279
lymphocyte aggregation	Gene Ontology	GO:0071593	7	428	2.59819e-05	0.000497259	3119|3117|161882|338339|11314|5788|26279
regulation of leukocyte activation	Gene Ontology	GO:0002694	7	430	2.6751e-05	0.00050827	100423062|10077|3119|3117|11314|5788|26279
lymphocyte activation	Gene Ontology	GO:0046649	8	599	2.79897e-05	0.000527978	100423062|3119|3117|161882|338339|11314|5788|26279
leukocyte aggregation	Gene Ontology	GO:0070486	7	435	2.87564e-05	0.000538567	3119|3117|161882|338339|11314|5788|26279
immune system development	Gene Ontology	GO:0002520	9	795	3.09847e-05	0.000568124	102725035|718|5788|3106|161882|338339|4780|51119|26279
humoral immune response	Gene Ontology	GO:0006959	5	178	3.31349e-05	0.00059917	1755|100423062|28984|3119|718
antigen processing and presentation of peptide antigen	Gene Ontology	GO:0048002	5	180	3.48987e-05	0.000626743	3117|3105|3106|948|3119
locomotion	Gene Ontology	GO:0040011	12	1480	3.66334e-05	0.000653421	4312|4680|57126|5788|91663|63923|5420|91662|28984|11314|51119|6710
cellular component organization	Gene Ontology	GO:0016043	26	5863	4.10068e-05	0.00072161	10257|3384|1058|161882|3857|6202|1291|51119|4312|10077|718|10562|28984|55062|6443|11314|6710|100423062|948|2040|348235|91663|5420|63923|1009|7508
regulation of cell activation	Gene Ontology	GO:0050865	7	463	4.2413e-05	0.00074138	100423062|10077|3119|3117|11314|5788|26279
cell surface receptor signaling pathway	Gene Ontology	GO:0007166	16	2583	4.33077e-05	0.000752006	3384|100423062|948|2887|3119|3117|3105|3106|3482|91662|338339|29121|10077|102725035|11314|5788
organic substance transport	Gene Ontology	GO:0071702	16	2585	4.37092e-05	0.000753984	6006|8501|2887|2040|718|84889|948|91663|91662|28984|326624|6202|1755|6583|10257|4780
leukocyte cell-cell adhesion	Gene Ontology	GO:0007159	7	466	4.41478e-05	0.000756572	3119|3117|161882|338339|11314|5788|26279
cell motility	Gene Ontology	GO:0048870	11	1288	5.03722e-05	0.00084664	4312|4680|57126|5788|91663|63923|5420|91662|28984|11314|51119
localization of cell	Gene Ontology	GO:0051674	11	1288	5.03722e-05	0.00084664	4312|4680|57126|5788|91663|63923|5420|91662|28984|11314|51119
symbiosis, encompassing mutualism through parasitism	Gene Ontology	GO:0044403	10	1062	5.12165e-05	0.000849934	4312|948|2040|10077|1058|3105|3106|6202|1755|5788
interspecies interaction between organisms	Gene Ontology	GO:0044419	10	1062	5.12165e-05	0.000849934	4312|948|2040|10077|1058|3105|3106|6202|1755|5788
cytoplasmic vesicle membrane	Gene Ontology	GO:0030659	7	478	5.16803e-05	0.000852237	948|3119|3117|3105|3106|1755|10257
cytoplasmic part	Gene Ontology	GO:0044444	31	7901	5.93831e-05	0.00097314	10257|4780|2887|1058|3105|3106|29121|57591|6202|1755|1291|6583|7390|60559|948|3482|2766|63929|28984|326624|7127|7846|6710|55062|3119|2040|10562|3117|348235|91663|55146
cellular component organization or biogenesis	Gene Ontology	GO:0071840	26	6012	6.31708e-05	0.00102243	10257|3384|1058|161882|3857|6202|1291|51119|4312|10077|718|10562|28984|55062|6443|11314|6710|100423062|948|2040|348235|91663|5420|63923|1009|7508
antigen receptor-mediated signaling pathway	Gene Ontology	GO:0050851	5	206	6.51462e-05	0.00104155	3117|11314|5788|3119|100423062
vesicle membrane	Gene Ontology	GO:0012506	7	497	6.57405e-05	0.00104468	948|3119|3117|3105|3106|1755|10257
regulation of response to stress	Gene Ontology	GO:0080134	11	1337	7.01417e-05	0.0011079	3384|2040|10077|718|948|3106|91662|338339|6318|1755|4780
regulation of body fluid levels	Gene Ontology	GO:0050878	7	506	7.34159e-05	0.00115155	6583|10077|948|718|57126|161882|4780
cellular response to cytokine stimulus	Gene Ontology	GO:0071345	8	689	7.37832e-05	0.00115155	3119|3117|3105|3106|91662|163351|5788|4780
adaptive immune response based on somatic recombination of immune receptors built from immunoglobulin superfamily domains	Gene Ontology	GO:0002460	5	213	7.59879e-05	0.00117894	3105|100423062|5788|3119|718
blood coagulation	Gene Ontology	GO:0007596	6	353	8.20617e-05	0.00125096	10077|948|718|57126|161882|4780
regulation of innate immune response	Gene Ontology	GO:0045088	6	356	8.58892e-05	0.00130174	3384|948|3106|338339|6318|1755
hemostasis	Gene Ontology	GO:0007599	6	358	8.8519e-05	0.00131534	10077|948|718|57126|161882|4780
coagulation	Gene Ontology	GO:0050817	6	358	8.8519e-05	0.00131534	10077|948|718|57126|161882|4780
response to chemical	Gene Ontology	GO:0042221	20	4014	8.87928e-05	0.00131534	3482|55062|948|2887|3119|718|6415|5788|3106|163351|4780|91662|3117|28984|51119|3105|1291|7508|6710|7390
response to bacterium	Gene Ontology	GO:0009617	7	524	9.09699e-05	0.00133253	100423062|948|3105|338339|163351|1755|51316
antigen processing and presentation	Gene Ontology	GO:0019882	5	223	9.38274e-05	0.00135941	3117|3105|3106|948|3119
vesicle-mediated transport	Gene Ontology	GO:0016192	11	1382	9.38418e-05	0.00135941	100423062|948|718|3482|55062|10257|7127|1755|11314|922|6710
regulation of lymphocyte activation	Gene Ontology	GO:0051249	6	376	0.000115194	0.00164151	100423062|3119|3117|11314|5788|26279
positive regulation of cytokine production	Gene Ontology	GO:0001819	6	383	0.000127146	0.00179235	948|718|91662|161882|28984|10394
hematopoietic or lymphoid organ development	Gene Ontology	GO:0048534	8	753	0.000135073	0.00188384	102725035|5788|3106|161882|338339|4780|51119|26279
regulation of cytokine production	Gene Ontology	GO:0001817	7	560	0.000136377	0.00188799	948|718|3106|91662|161882|28984|10394
protein metabolic process	Gene Ontology	GO:0019538	23	5191	0.000137332	0.00188799	9263|161882|4780|57591|6202|1755|5788|4312|718|60559|28984|55062|10394|11314|6710|100423062|948|91663|91662|8859|63929|6318|7508
movement of cell or subcellular component	Gene Ontology	GO:0006928	12	1715	0.000146931	0.00199614	4312|4680|57126|5788|91663|63923|5420|91662|28984|11314|51119|6710
positive regulation of defense response	Gene Ontology	GO:0031349	6	400	0.000160296	0.00215536	3384|948|718|91662|338339|1755
cellular response to chemical stimulus	Gene Ontology	GO:0070887	15	2587	0.000161908	0.00216593	55062|948|2887|3119|3117|51119|3106|163351|4780|91662|28984|3105|1291|5788|7390
vacuolar membrane	Gene Ontology	GO:0005774	7	586	0.000179447	0.00236438	55062|3119|3117|3105|3106|3482|1291
endocytosis	Gene Ontology	GO:0006897	7	595	0.000196696	0.00254893	100423062|948|718|3482|1755|11314|922
response to cytokine	Gene Ontology	GO:0034097	8	797	0.000197896	0.00254893	3119|3117|3105|3106|91662|163351|5788|4780
macromolecular complex	Gene Ontology	GO:0032991	21	4606	0.000198696	0.00254893	1058|100423062|10077|3119|60559|348235|3106|3482|2766|161882|3117|55635|6443|6202|3105|7127|7846|1291|7508|6710|4780
negative regulation of protein metabolic process	Gene Ontology	GO:0051248	9	1018	0.000198752	0.00254893	718|91663|91662|161882|10394|57591|6318|11314|5788
cytoplasmic vesicle part	Gene Ontology	GO:0044433	7	604	0.000215262	0.00272665	948|3119|3117|3105|3106|1755|10257
viral process	Gene Ontology	GO:0016032	9	1032	0.000219673	0.00276914	4312|2040|10077|1058|3105|3106|6202|1755|5788
multi-organism cellular process	Gene Ontology	GO:0044764	9	1036	0.000225976	0.00282147	4312|2040|10077|1058|3105|3106|6202|1755|5788
cytokine production	Gene Ontology	GO:0001816	7	619	0.000249335	0.00308376	948|718|3106|91662|161882|28984|10394
cellular component biogenesis	Gene Ontology	GO:0044085	15	2724	0.000282385	0.00342785	4312|55062|948|2040|1058|51119|91663|5420|10562|28984|6710|6202|1291|7508|10257
receptor activity	Gene Ontology	GO:0004872	11	1579	0.000295452	0.00347073	3482|102725035|3119|3117|948|945|29121|1755|11314|5788|922
molecular transducer activity	Gene Ontology	GO:0060089	11	1579	0.000295452	0.00347073	3482|102725035|3119|3117|948|945|29121|1755|11314|5788|922
membrane raft	Gene Ontology	GO:0045121	5	287	0.000295806	0.00347073	948|91663|5788|5420|2040
regulation of T cell activation	Gene Ontology	GO:0050863	5	287	0.000295806	0.00347073	3117|11314|5788|3119|26279
membrane microdomain	Gene Ontology	GO:0098857	5	288	0.000300479	0.00347073	948|91663|5788|5420|2040
leukocyte differentiation	Gene Ontology	GO:0002521	6	454	0.000313011	0.00359134	102725035|3106|161882|338339|5788|26279
cellular response to organic substance	Gene Ontology	GO:0071310	13	2149	0.00031366	0.00359134	55062|948|2887|3119|3117|3105|3106|4780|91662|163351|1291|5788|7390
multicellular organism development	Gene Ontology	GO:0007275	21	4770	0.000321691	0.00366728	718|102725035|5420|4780|51119|3106|3482|91663|63923|161882|338339|3857|28984|6443|1009|7127|1755|1291|5788|6710|26279
cellular component assembly	Gene Ontology	GO:0022607	14	2458	0.000330827	0.00375511	4312|55062|948|2040|1058|51119|91663|5420|10562|28984|10257|1291|7508|6710
intracellular organelle	Gene Ontology	GO:0043229	38	11680	0.000350409	0.00394323	9263|161882|10257|4780|1058|3105|3106|29121|57591|3857|6202|1755|1291|51119|6583|7390|60559|948|3482|55146|28984|326624|6443|23541|7846|6710|55062|2040|3119|10562|3117|348235|91663|5420|55635|8859|63929|7508
regulation of leukocyte cell-cell adhesion	Gene Ontology	GO:1903037	5	300	0.000361036	0.00402824	3117|11314|5788|3119|26279
response to organic substance	Gene Ontology	GO:0010033	15	2810	0.000392573	0.0043249	55062|948|2887|3119|718|3117|3105|3106|3482|4780|91662|163351|1291|5788|7390
vacuolar part	Gene Ontology	GO:0044437	7	690	0.000474537	0.00516281	55062|3119|3117|3105|3106|3482|1291
extracellular matrix organization	Gene Ontology	GO:0030198	5	323	0.000502432	0.0054213	28984|1291|4312|948|3384
extracellular structure organization	Gene Ontology	GO:0043062	5	324	0.000509402	0.00547399	28984|1291|4312|948|3384
plasma membrane protein complex	Gene Ontology	GO:0098797	6	502	0.000528433	0.00563232	10077|3119|3117|3105|3106|6443
hemopoiesis	Gene Ontology	GO:0030097	7	709	0.000556387	0.00590626	102725035|3106|161882|338339|4780|5788|26279
protein complex	Gene Ontology	GO:0043234	18	3913	0.000572573	0.00603173	1058|100423062|10077|3119|60559|348235|3106|3482|2766|161882|55635|6443|3117|3105|7127|1291|7508|6710
metabolic process	Gene Ontology	GO:0008152	35	10642	0.000597851	0.00619591	9263|161882|10257|4780|2887|6039|57591|6202|1755|1291|51119|26279|6583|4312|7390|718|60559|2766|28984|55062|10394|23541|11314|6710|100423062|948|5788|91663|91662|55635|8859|63929|6318|7508|51316
cell morphogenesis involved in differentiation	Gene Ontology	GO:0000904	7	721	0.000613627	0.00633437	91663|28984|161882|10562|63923|1009|6710
transport vesicle	Gene Ontology	GO:0030133	5	339	0.000622943	0.00640531	3117|3105|3106|3482|3119
negative regulation of cellular protein metabolic process	Gene Ontology	GO:0032269	8	961	0.000676604	0.00677121	718|91663|91662|57591|10394|6318|11314|5788
organic substance metabolic process	Gene Ontology	GO:0071704	34	10277	0.000681719	0.00679646	9263|161882|4780|2887|6039|57591|6202|1755|1291|51119|26279|6583|4312|7390|718|60559|2766|28984|55062|10394|23541|11314|6710|100423062|948|5788|91663|91662|55635|8859|63929|6318|7508|51316
wound healing	Gene Ontology	GO:0042060	6	537	0.000747687	0.00734246	10077|948|718|57126|161882|4780
cellular protein metabolic process	Gene Ontology	GO:0044267	20	4725	0.000768847	0.00752208	9263|4312|55062|948|718|60559|7508|91663|8859|57591|91662|28984|10394|6202|6318|11314|5788|1755|6710|4780
membrane region	Gene Ontology	GO:0098589	5	362	0.000832625	0.00802626	948|91663|5788|5420|2040
macromolecule metabolic process	Gene Ontology	GO:0043170	30	8738	0.000936106	0.008893	9263|161882|4780|2887|6039|57591|6202|1755|1291|51119|4312|718|60559|28984|55062|10394|23541|11314|6710|100423062|948|5788|91663|91662|55635|8859|63929|6318|7508|51316
membrane protein complex	Gene Ontology	GO:0098796	8	1028	0.00104073	0.00965095	10077|3119|60559|3105|3106|3482|3117|6443
endosome	Gene Ontology	GO:0005768	7	792	0.00105528	0.00974272	55062|3119|3117|3105|3106|3482|7846
endosome membrane	Gene Ontology	GO:0010008	5	397	0.00124731	0.0110488	3117|3105|3106|55062|3119
signaling receptor activity	Gene Ontology	GO:0038023	9	1322	0.00127474	0.0112538	3119|102725035|3117|948|3482|29121|1755|11314|5788
system development	Gene Ontology	GO:0048731	18	4206	0.00132414	0.0115345	102725035|5420|51119|3106|3482|63923|161882|338339|3857|28984|6443|1009|7127|718|4780|5788|6710|26279
anatomical structure morphogenesis	Gene Ontology	GO:0009653	13	2513	0.00133763	0.0116134	948|718|91663|63923|161882|5420|10562|28984|6710|1009|7127|1291|10257
intracellular membrane-bounded organelle	Gene Ontology	GO:0043231	34	10674	0.00139443	0.0119875	9263|161882|10257|4780|1058|3105|3106|29121|57591|3857|6202|1755|1291|51119|6583|7390|60559|948|3482|55146|28984|326624|23541|7846|55062|2040|3119|10562|3117|5420|55635|8859|63929|7508
macromolecular complex assembly	Gene Ontology	GO:0065003	10	1619	0.00140641	0.012051	4312|948|2040|1058|7508|91663|10562|1291|51119|6710
primary metabolic process	Gene Ontology	GO:0044238	32	9824	0.00145101	0.0122728	9263|161882|4780|2887|6039|57591|6202|1755|51119|26279|6583|4312|718|60559|2766|28984|55062|10394|23541|11314|6710|100423062|948|5788|91663|91662|55635|8859|63929|6318|7508|51316
lipid binding	Gene Ontology	GO:0008289	6	616	0.00149871	0.0125422	55062|948|718|3482|23541|11314
negative regulation of response to stimulus	Gene Ontology	GO:0048585	9	1355	0.00150889	0.0125597	2887|3106|91663|91662|57591|6318|11314|5788|4780
establishment of localization in cell	Gene Ontology	GO:0051649	11	1935	0.00155729	0.0128	11314|948|2040|1058|91663|91662|55062|6202|7846|5788|6710
negative regulation of phosphorylation	Gene Ontology	GO:0042326	5	419	0.00157614	0.0129145	91663|11314|5788|2887|91662
negative regulation of macromolecule metabolic process	Gene Ontology	GO:0010605	12	2269	0.0017328	0.0139653	2887|948|718|91663|91662|57591|55635|10394|161882|6318|11314|5788
endosomal part	Gene Ontology	GO:0044440	5	430	0.00176261	0.0140901	3117|3105|3106|55062|3119
single-organism metabolic process	Gene Ontology	GO:0044710	17	3962	0.00179922	0.0142956	6583|4312|1291|2887|948|718|4780|26279|2766|91662|28984|10394|6710|23541|11314|10257|7390
negative regulation of cellular metabolic process	Gene Ontology	GO:0031324	12	2290	0.00187111	0.01469	2887|948|718|91663|91662|57591|55635|10394|161882|6318|11314|5788
anatomical structure formation involved in morphogenesis	Gene Ontology	GO:0048646	8	1129	0.00187126	0.01469	948|718|5420|161882|28984|7127|1291|10257
cytoskeleton	Gene Ontology	GO:0005856	11	1983	0.00188738	0.0147648	55062|2040|348235|91663|3857|28984|6443|7846|51119|6710|4780
response to wounding	Gene Ontology	GO:0009611	6	646	0.00189958	0.0147795	10077|948|718|57126|161882|4780
bounding membrane of organelle	Gene Ontology	GO:0098588	10	1694	0.00196005	0.0150711	55062|948|3119|3117|3105|3106|3482|1755|1291|10257
tissue development	Gene Ontology	GO:0009888	10	1723	0.00221664	0.0167012	51119|91663|5420|161882|3857|28984|6443|1755|1291|5788
vacuole	Gene Ontology	GO:0005773	8	1169	0.0023181	0.0172672	1291|3119|3117|3105|3106|3482|55062|7846
cell morphogenesis	Gene Ontology	GO:0000902	8	1170	0.00233026	0.0172928	91663|28984|161882|10562|63923|10257|1009|6710
negative regulation of transport	Gene Ontology	GO:0051051	5	461	0.0023752	0.0174586	28984|11314|2887|948|91662
Golgi membrane	Gene Ontology	GO:0000139	6	676	0.00237708	0.0174586	55062|3119|3117|3105|3106|3482
cellular localization	Gene Ontology	GO:0051641	12	2394	0.00269747	0.0193245	7846|948|2040|1058|91663|91662|55062|6202|7127|11314|5788|6710
positive regulation of protein metabolic process	Gene Ontology	GO:0051247	9	1484	0.00277869	0.019655	948|718|91662|161882|28984|10394|11314|5788|4780
single-organism intracellular transport	Gene Ontology	GO:1902582	6	698	0.00278108	0.019655	2040|948|91663|91662|6202|11314
macromolecule localization	Gene Ontology	GO:0033036	13	2734	0.00280686	0.0197838	55062|948|2040|718|1058|91663|91662|28984|326624|6202|7127|1755|10257
endomembrane system	Gene Ontology	GO:0012505	16	3788	0.00293475	0.0204652	7846|948|2040|3119|10562|60559|3105|3106|3482|29121|3117|55062|55146|1755|1291|10257
cellular macromolecule metabolic process	Gene Ontology	GO:0044260	27	8101	0.0030015	0.0208199	9263|161882|4780|2887|8859|57591|6202|1755|51119|4312|718|60559|28984|10394|23541|11314|6710|55062|948|5788|91663|91662|55635|6039|6318|7508|51316
positive regulation of cellular metabolic process	Gene Ontology	GO:0031325	13	2759	0.00303521	0.0209982	2887|948|718|91662|57591|28984|10394|161882|23541|11314|5788|51316|4780
regulation of protein metabolic process	Gene Ontology	GO:0051246	12	2443	0.0031794	0.0217121	948|718|91663|91662|161882|28984|10394|57591|6318|11314|5788|4780
cellular metabolic process	Gene Ontology	GO:0044237	31	9846	0.00318094	0.0217121	9263|161882|4780|2887|6039|57591|6202|1755|51119|26279|6583|4312|7390|718|60559|2766|28984|10394|23541|11314|6710|55062|948|5788|91663|91662|55635|8859|6318|7508|51316
macromolecular complex binding	Gene Ontology	GO:0044877	8	1232	0.00318809	0.0217121	3384|2887|948|1058|63923|51119|51316|6710
negative regulation of metabolic process	Gene Ontology	GO:0009892	12	2465	0.00341751	0.0227429	2887|948|718|91663|91662|57591|55635|10394|161882|6318|11314|5788
protein phosphorylation	Gene Ontology	GO:0006468	10	1832	0.00343475	0.0227998	9263|948|718|91663|8859|91662|28984|11314|5788|6710
cellular component morphogenesis	Gene Ontology	GO:0032989	8	1250	0.00347838	0.0228883	91663|28984|161882|10562|63923|10257|1009|6710
regulation of cellular component biogenesis	Gene Ontology	GO:0044087	6	739	0.00366902	0.0238714	4312|948|91663|5420|28984|6710
intracellular transport	Gene Ontology	GO:0046907	9	1549	0.00368132	0.0238922	11314|948|2040|91663|91662|55062|6202|7846|6710
membrane organization	Gene Ontology	GO:0061024	7	1004	0.00394847	0.0250064	100423062|2040|948|91663|6443|6202|11314
cell development	Gene Ontology	GO:0048468	10	1870	0.00396746	0.0250064	91663|63923|161882|5420|10562|28984|6443|1009|5788|6710
phosphorylation	Gene Ontology	GO:0016310	11	2190	0.00403219	0.0253535	9263|2887|948|718|91663|8859|91662|28984|11314|5788|6710
regulation of cellular component organization	Gene Ontology	GO:0051128	11	2218	0.0044328	0.0276207	4312|948|2040|718|348235|91663|5420|10562|28984|11314|6710
negative regulation of phosphate metabolic process	Gene Ontology	GO:0045936	5	535	0.00444544	0.0276207	91663|11314|5788|2887|91662
negative regulation of phosphorus metabolic process	Gene Ontology	GO:0010563	5	535	0.00444544	0.0276207	91663|11314|5788|2887|91662
cytoskeleton organization	Gene Ontology	GO:0007010	7	1036	0.00467327	0.0286963	10077|1058|348235|91663|3857|28984|6710
cytokine-mediated signaling pathway	Gene Ontology	GO:0019221	5	543	0.00472786	0.0289637	3117|3105|3106|5788|3119
regulation of response to external stimulus	Gene Ontology	GO:0032101	6	794	0.00517212	0.0311813	2040|10077|948|718|91662|4780
intracellular signal transduction	Gene Ontology	GO:0035556	12	2598	0.00518499	0.0311813	9263|948|718|84889|91663|91662|55635|28984|326624|11314|6710|4780
secretion	Gene Ontology	GO:0046903	7	1066	0.00544038	0.0324936	6583|948|91662|28984|7127|11314|10257
positive regulation of metabolic process	Gene Ontology	GO:0009893	13	2962	0.00551448	0.0327867	2887|948|718|91662|57591|28984|10394|161882|23541|11314|5788|51316|4780
negative regulation of molecular function	Gene Ontology	GO:0044092	7	1072	0.00560455	0.0330228	718|91662|161882|57591|6318|11314|5788
regulation of cellular protein metabolic process	Gene Ontology	GO:0032268	11	2295	0.005701	0.0334408	948|718|91663|91662|57591|28984|10394|6318|11314|5788|4780
single-organism cellular localization	Gene Ontology	GO:1902580	7	1077	0.00574419	0.033494	2040|948|1058|91663|91662|6202|11314
signal transducer activity	Gene Ontology	GO:0004871	9	1662	0.00578671	0.033494	3119|102725035|3117|948|3482|29121|1755|11314|5788
protein complex biogenesis	Gene Ontology	GO:0070271	8	1365	0.00584997	0.0337113	4312|2040|948|1058|91663|10562|1291|6710
protein complex assembly	Gene Ontology	GO:0006461	8	1365	0.00584997	0.0337113	4312|2040|948|1058|91663|10562|1291|6710
regulation of phosphorylation	Gene Ontology	GO:0042325	8	1371	0.00600102	0.0343614	2887|948|718|91663|91662|28984|11314|5788
negative regulation of signal transduction	Gene Ontology	GO:0009968	7	1086	0.0060021	0.0343614	2887|91663|91662|57591|11314|5788|4780
phosphate-containing compound metabolic process	Gene Ontology	GO:0006796	13	3008	0.00625797	0.0354393	9263|2887|948|718|91663|8859|2766|91662|28984|11314|5788|6710|26279
phosphorus metabolic process	Gene Ontology	GO:0006793	13	3016	0.00639515	0.0358292	9263|2887|948|718|91663|8859|2766|91662|28984|11314|5788|6710|26279
single-organism organelle organization	Gene Ontology	GO:1902589	9	1702	0.00672257	0.0373078	55062|2040|1058|348235|91663|3857|28984|10257|6710
macromolecular complex subunit organization	Gene Ontology	GO:0043933	11	2348	0.00673021	0.0373078	4312|948|2040|1058|7508|91663|161882|10562|1291|51119|6710
protein localization	Gene Ontology	GO:0008104	11	2383	0.0074867	0.0406285	55062|948|2040|1058|91663|91662|28984|326624|6202|7127|1755
Golgi apparatus	Gene Ontology	GO:0005794	8	1431	0.00768079	0.0412685	55062|948|3119|3117|3105|3106|3482|55146
animal organ development	Gene Ontology	GO:0048513	13	3087	0.00772153	0.0414025	102725035|51119|3106|3482|5420|161882|338339|3857|28984|6443|4780|5788|26279
mitotic cell cycle process	Gene Ontology	GO:1903047	6	867	0.00781167	0.0418004	1058|348235|28984|7846|51119|7508
regulation of localization	Gene Ontology	GO:0032879	11	2405	0.00799543	0.0423515	2887|2040|718|948|91663|5420|91662|28984|11314|5788|4780
positive regulation of cellular component organization	Gene Ontology	GO:0051130	7	1150	0.00809445	0.0426134	4312|2040|948|718|91663|10562|28984
positive regulation of macromolecule metabolic process	Gene Ontology	GO:0010604	12	2767	0.0084188	0.043453	948|718|91662|161882|28984|10394|57591|23541|11314|5788|51316|4780
receptor binding	Gene Ontology	GO:0005102	8	1458	0.00854345	0.0438374	3384|100423062|2887|718|3106|338339|63923|55062
Golgi apparatus part	Gene Ontology	GO:0044431	6	886	0.00863431	0.0439595	55062|3119|3117|3105|3106|3482
cytoskeletal part	Gene Ontology	GO:0044430	8	1468	0.00888082	0.0449527	348235|91663|3857|28984|7846|51119|6710|4780
negative regulation of cell proliferation	Gene Ontology	GO:0008285	5	640	0.00923827	0.0464928	11314|945|28984|10077|26279
regulation of cell differentiation	Gene Ontology	GO:0045595	8	1484	0.00944134	0.047333	102725035|948|3106|91663|161882|10562|28984|4780
inflammatory response	Gene Ontology	GO:0006954	5	644	0.00947143	0.0473933	718|922|4780|91662|26279
negative regulation of cell communication	Gene Ontology	GO:0010648	7	1190	0.00965089	0.0478348	2887|91663|91662|57591|11314|5788|4780
negative regulation of signaling	Gene Ontology	GO:0023057	7	1194	0.00981782	0.0485704	2887|91663|91662|57591|11314|5788|4780
--------------------

## Sheet: muscle
#Term	Database	ID	Input number	Background number	P-Value	Corrected P-Value	Input
contractile fiber part	Gene Ontology	GO:0044449	18	198	5.81271e-25	1.04084e-21	11155|7273|58|2318|219537|8048|79026|84033|6261|27295|4619|4621|88|274|4626|7138|137735|286
myofibril	Gene Ontology	GO:0030016	18	202	8.15388e-25	1.04084e-21	11155|7273|58|2318|219537|8048|79026|84033|6261|27295|4619|4621|88|274|4626|7138|137735|286
contractile fiber	Gene Ontology	GO:0043292	18	213	2.00186e-24	1.70359e-21	11155|7273|58|2318|219537|8048|79026|84033|6261|27295|4619|4621|88|274|4626|7138|137735|286
sarcomere	Gene Ontology	GO:0030017	17	181	7.89411e-24	5.03841e-21	11155|7273|58|2318|219537|8048|84033|6261|27295|4619|4621|88|274|4626|7138|137735|286
cytoplasmic part	Gene Ontology	GO:0044444	55	7901	3.01783e-23	1.5409e-20	53354|1307|79026|3119|339896|9092|84618|4619|7138|88|274|2548|729438|3304|154810|137735|10345|11155|2887|54858|399687|3106|84033|56479|6283|8048|26259|54529|79188|8844|286|65083|6202|2938|60559|2766|445|4621|1956|51465|4626|3339|7846|7273|378884|58|2318|3117|6261|27295|219537|63875|7352|128486|3105
intracellular	Gene Ontology	GO:0005622	66	13775	1.33062e-21	5.6618e-19	84448|1307|79026|53354|3119|339896|9092|84618|4619|7138|88|64783|274|2548|729438|3304|154810|137735|10345|11155|2887|54858|399687|166348|84033|63875|196541|6283|8048|26259|54529|79188|8844|55174|65083|6202|2938|60559|2766|445|64798|4621|1956|51465|56479|4626|8886|3339|7846|7273|378884|58|2318|3117|6261|6443|5420|27295|219537|140458|7352|128486|3105|286|3106|2690
cellular process	Gene Ontology	GO:0009987	67	14647	4.37039e-21	1.59394e-18	84448|1307|79026|53354|3119|339896|59084|9092|84618|7138|88|64783|274|2548|3304|154810|137735|10345|11155|2887|6261|399687|166348|84033|63875|196541|6283|60559|26259|54529|79188|8844|55174|8048|65083|6202|2938|84889|2766|445|64798|4621|7352|51465|56479|4626|8886|3339|7846|57661|7273|378884|58|2318|3117|729438|6443|5420|27295|219537|140458|1956|128486|3105|286|3106|2690
cell part	Gene Ontology	GO:0044464	68	15776	3.35758e-20	1.05717e-17	84448|1307|79026|53354|3119|339896|59084|9092|84618|4619|7138|88|64783|274|2548|729438|3304|154810|137735|10345|11155|2887|54858|399687|166348|84033|63875|196541|6283|60559|26259|54529|79188|8844|55174|8048|65083|6202|2938|84889|2766|445|64798|4621|7352|51465|56479|4626|8886|3339|7846|7273|378884|58|2318|3117|6261|6443|5420|27295|219537|140458|1956|128486|3105|286|3106|2690
cell	Gene Ontology	GO:0005623	68	15802	3.72682e-20	1.05717e-17	84448|1307|79026|53354|3119|339896|59084|9092|84618|4619|7138|88|64783|274|2548|729438|3304|154810|137735|10345|11155|2887|54858|399687|166348|84033|63875|196541|6283|60559|26259|54529|79188|8844|55174|8048|65083|6202|2938|84889|2766|445|64798|4621|7352|51465|56479|4626|8886|3339|7846|7273|378884|58|2318|3117|6261|6443|5420|27295|219537|140458|1956|128486|3105|286|3106|2690
cytoplasm	Gene Ontology	GO:0005737	58	10469	4.91656e-20	1.2552e-17	84448|1307|79026|53354|3119|339896|9092|84618|4619|7138|88|274|2548|729438|3304|154810|137735|10345|11155|2887|54858|399687|3106|84033|56479|6283|8048|26259|54529|79188|8844|286|65083|6202|2938|60559|2766|445|4621|1956|51465|6443|4626|3339|7846|7273|378884|58|2318|3117|6261|5420|27295|219537|63875|7352|128486|3105
binding	Gene Ontology	GO:0005488	64	13918	3.4035e-19	7.8992e-17	84448|1307|79026|53354|3119|339896|59084|9092|84618|4619|7138|88|64783|274|2548|3304|154810|137735|10345|11155|2887|6261|399687|3106|84033|56479|196541|6283|3105|26259|54529|55668|79188|8844|55174|65083|6202|8048|2766|445|64798|4621|1956|51465|4626|3339|7846|57661|7273|378884|58|2318|3117|729438|5420|27295|219537|63875|7352|55222|8933|286|8886|2690
intracellular part	Gene Ontology	GO:0044424	63	13428	4.4416e-19	9.44949e-17	84448|1307|79026|53354|3119|339896|9092|84618|4619|7138|88|64783|274|2548|729438|3304|154810|137735|10345|11155|2887|54858|399687|3106|84033|56479|196541|6283|8048|26259|54529|79188|8844|55174|65083|6202|2938|60559|2766|445|4621|1956|51465|6443|4626|8886|3339|7846|7273|378884|58|2318|3117|6261|5420|27295|219537|63875|7352|128486|3105|286|166348
single-organism cellular process	Gene Ontology	GO:0044763	58	11494	6.05424e-18	1.18896e-15	84448|1307|53354|3119|339896|59084|9092|84618|7138|88|64783|274|2548|3304|154810|137735|10345|11155|2887|6261|399687|3106|84033|63875|6283|8048|26259|54529|79188|8844|286|6202|2938|84889|2766|445|64798|4621|1956|51465|6443|4626|3339|7846|7273|378884|58|2318|3117|729438|5420|27295|56479|140458|7352|128486|3105|2690
single-organism process	Gene Ontology	GO:0044699	60	12728	1.7752e-17	3.23721e-15	84448|1307|53354|3119|339896|59084|9092|84618|7138|88|64783|274|2548|3304|154810|137735|10345|11155|2887|6261|399687|3106|84033|63875|6283|8048|26259|54529|79188|8844|286|65083|6202|2938|84889|2766|445|64798|4621|1956|51465|56479|4626|3339|7846|7273|378884|58|2318|3117|729438|6443|5420|27295|219537|140458|7352|128486|3105|2690
protein binding	Gene Ontology	GO:0005515	55	10621	5.88482e-17	1.0016e-14	84448|1307|79026|9092|4619|7138|88|64783|274|3304|154810|137735|10345|11155|2887|6261|399687|3106|84033|56479|196541|6283|3105|26259|54529|55668|79188|8844|55174|65083|8048|445|64798|4621|1956|51465|4626|3339|7846|57661|7273|378884|58|2318|729438|5420|27295|219537|63875|7352|55222|8933|286|8886|2690
I band	Gene Ontology	GO:0031674	11	124	1.82069e-15	2.90513e-13	11155|7273|2318|6261|8048|84033|27295|219537|88|274|286
cytoskeletal protein binding	Gene Ontology	GO:0008092	18	817	1.59279e-14	2.39199e-12	11155|84448|58|2318|7138|8048|399687|84033|27295|4619|4621|88|1956|274|4626|7273|137735|286
organelle part	Gene Ontology	GO:0044422	45	8165	1.17677e-13	1.66906e-11	1307|3119|9092|4619|7138|88|64783|274|2548|3304|154810|137735|10345|11155|6261|3105|3106|84033|8048|6202|79188|8844|286|65083|399687|60559|445|4621|1956|51465|4626|3339|7846|7273|58|2318|3117|27295|219537|63875|7352|128486|79026|55174|8886
striated muscle cell development	Gene Ontology	GO:0055002	10	129	1.31628e-13	1.76867e-11	11155|7273|58|2318|6261|8048|84033|4621|88|6443
intracellular organelle	Gene Ontology	GO:0043229	53	11680	1.99122e-13	2.5418e-11	84448|1307|79026|53354|3119|9092|4619|7138|88|64783|274|2548|3304|154810|137735|10345|11155|6261|399687|3106|84033|196541|6283|8048|26259|6202|79188|8844|286|65083|60559|445|4621|1956|51465|6443|4626|3339|7846|7273|378884|58|2318|3117|5420|27295|219537|63875|7352|128486|3105|55174|8886
muscle cell development	Gene Ontology	GO:0055001	10	142	3.24951e-13	3.95048e-11	11155|7273|58|2318|6261|8048|84033|4621|88|6443
Z disc	Gene Ontology	GO:0030018	9	109	1.37227e-12	1.54782e-10	11155|7273|2318|8048|84033|27295|88|274|286
organelle	Gene Ontology	GO:0043226	54	12692	1.39443e-12	1.54782e-10	84448|1307|79026|53354|3119|9092|4619|7138|88|64783|274|2548|3304|154810|137735|10345|11155|6261|399687|3106|84033|196541|6283|8048|26259|6202|79188|8844|286|65083|2938|60559|445|4621|1956|51465|6443|4626|3339|7846|7273|378884|58|2318|3117|5420|27295|219537|63875|7352|128486|3105|55174|8886
macromolecular complex	Gene Ontology	GO:0032991	33	4606	1.90139e-12	2.02261e-10	53354|1307|9092|4619|7138|274|3304|154810|399687|10345|6261|3105|166348|63875|26259|6202|8844|55174|65083|60559|2766|4621|1956|6443|4626|7846|7273|3119|3117|729438|56479|3106|2690
actin cytoskeleton	Gene Ontology	GO:0015629	13	450	3.93381e-12	4.01721e-10	84448|58|7138|399687|27295|4619|4621|88|274|4626|79026|7273|137735
cytosol	Gene Ontology	GO:0005829	28	3407	7.86904e-12	7.72679e-10	53354|339896|9092|7138|88|3304|154810|2887|54858|79026|84033|6283|6202|84618|8844|286|54529|2938|2766|445|4621|4626|7846|7273|378884|58|2318|729438
myofibril assembly	Gene Ontology	GO:0030239	7	53	2.24356e-11	2.12141e-09	11155|7273|58|8048|84033|4621|88
striated muscle cell differentiation	Gene Ontology	GO:0051146	10	231	3.20044e-11	2.91811e-09	11155|7273|58|2318|6261|8048|84033|4621|88|6443
muscle contraction	Gene Ontology	GO:0006936	11	323	3.71055e-11	3.26656e-09	7273|58|7138|8048|2548|6261|4619|4621|88|4626|10345
muscle structure development	Gene Ontology	GO:0061061	13	560	5.53204e-11	4.70777e-09	11155|7273|58|2318|219537|8048|84033|6261|445|4621|88|274|6443
muscle cell differentiation	Gene Ontology	GO:0042692	11	340	6.29814e-11	5.18682e-09	11155|7273|58|2318|6261|8048|84033|4621|88|274|6443
cytoskeleton	Gene Ontology	GO:0005856	21	1983	7.48564e-11	5.97214e-09	11155|84448|8048|58|2318|7138|7273|399687|27295|6283|4619|4621|88|274|6443|4626|79026|3304|7846|137735|286
metabolic process	Gene Ontology	GO:0008152	47	10642	8.49749e-11	6.57397e-09	84448|2548|53354|339896|59084|9092|88|64783|3304|137735|2887|54858|399687|166348|84033|63875|196541|6283|8048|26259|54529|84618|8844|55174|65083|6202|2938|60559|2766|445|64798|4621|1956|51465|4626|3339|57661|7273|378884|58|219537|140458|7352|128486|79026|8886|2690
structural molecule activity	Gene Ontology	GO:0005198	14	719	8.98884e-11	6.74956e-09	7273|58|8048|79026|84033|63875|27295|4626|88|7352|6202|7846|8844|286
organic substance metabolic process	Gene Ontology	GO:0071704	46	10277	1.08851e-10	7.71393e-09	84448|2548|53354|339896|9092|88|64783|3304|137735|2887|54858|399687|166348|84033|63875|196541|6283|8048|26259|54529|84618|8844|55174|65083|6202|2938|60559|2766|445|64798|4621|1956|51465|4626|3339|57661|7273|378884|58|219537|140458|7352|128486|79026|8886|2690
intracellular non-membrane-bounded organelle	Gene Ontology	GO:0043232	28	3816	1.11796e-10	7.71393e-09	84448|4619|7138|88|274|3304|399687|11155|6261|137735|8886|84033|6283|6202|286|65083|8048|4621|6443|4626|7846|7273|58|2318|27295|219537|63875|79026
non-membrane-bounded organelle	Gene Ontology	GO:0043228	28	3816	1.11796e-10	7.71393e-09	84448|4619|7138|88|274|3304|399687|11155|6261|137735|8886|84033|6283|6202|286|65083|8048|4621|6443|4626|7846|7273|58|2318|27295|219537|63875|79026
actin filament binding	Gene Ontology	GO:0051015	8	119	1.20423e-10	8.09054e-09	7273|2318|4621|88|1956|274|4626|399687
protein complex	Gene Ontology	GO:0043234	28	3913	1.99477e-10	1.3058e-08	53354|1307|4619|7138|3304|154810|399687|10345|6261|3105|166348|26259|8844|55174|65083|60559|2766|4621|1956|6443|4626|7273|3119|3117|729438|56479|3106|2690
muscle system process	Gene Ontology	GO:0003012	11	388	2.44911e-10	1.52502e-08	7273|58|7138|8048|2548|6261|4619|4621|88|4626|10345
actin binding	Gene Ontology	GO:0003779	11	388	2.44911e-10	1.52502e-08	84448|2318|7273|399687|4619|4621|88|1956|274|4626|137735
actin-myosin filament sliding	Gene Ontology	GO:0033275	6	39	2.79003e-10	1.6565e-08	7273|58|7138|4621|88|4626
muscle filament sliding	Gene Ontology	GO:0030049	6	39	2.79003e-10	1.6565e-08	7273|58|7138|4621|88|4626
structural constituent of muscle	Gene Ontology	GO:0008307	6	41	3.66716e-10	2.12779e-08	7273|8048|84033|27295|88|4626
primary metabolic process	Gene Ontology	GO:0044238	44	9824	4.45043e-10	2.52488e-08	84448|2548|53354|339896|9092|88|64783|3304|137735|2887|54858|399687|166348|84033|63875|196541|6283|8048|26259|54529|84618|8844|55174|65083|6202|60559|2766|445|64798|4621|1956|51465|4626|3339|57661|7273|378884|219537|140458|7352|128486|79026|8886|2690
cellular metabolic process	Gene Ontology	GO:0044237	44	9846	4.80309e-10	2.66572e-08	84448|2548|53354|339896|9092|88|64783|3304|137735|2887|399687|166348|84033|63875|196541|6283|8048|26259|54529|84618|8844|55174|65083|6202|2938|60559|2766|445|64798|4621|1956|51465|4626|3339|57661|7273|378884|219537|140458|7352|128486|79026|8886|2690
actomyosin structure organization	Gene Ontology	GO:0031032	8	146	5.62738e-10	3.05675e-08	11155|7273|58|8048|84033|4621|88|399687
actin filament-based process	Gene Ontology	GO:0030029	12	620	2.4117e-09	1.28272e-07	11155|84448|58|7138|8048|84033|27295|4621|88|4626|7273|399687
sarcomere organization	Gene Ontology	GO:0045214	5	33	9.8775e-09	5.14638e-07	11155|4621|88|84033|7273
A band	Gene Ontology	GO:0031672	5	34	1.13135e-08	5.77667e-07	4619|219537|84033|7273|286
actin-mediated cell contraction	Gene Ontology	GO:0070252	6	94	3.76302e-08	1.88372e-06	7273|58|7138|4621|88|4626
cellular component organization or biogenesis	Gene Ontology	GO:0071840	31	6012	4.2283e-08	2.07594e-06	84448|1307|9092|88|274|2548|3304|399687|10345|11155|79026|84033|63875|26259|6202|79188|286|65083|8048|64798|4621|1956|6443|3339|7273|58|2318|5420|27295|56479|128486
macromolecule metabolic process	Gene Ontology	GO:0043170	38	8738	4.92107e-08	2.37047e-06	84448|2548|9092|88|64783|3304|137735|2887|54858|399687|166348|84033|63875|196541|6283|8048|26259|6202|8844|55174|65083|60559|64798|4621|1956|51465|4626|3339|57661|7273|378884|58|219537|140458|7352|79026|8886|2690
endoplasmic reticulum	Gene Ontology	GO:0005783	16	1623	5.39313e-08	2.54975e-06	1307|378884|3119|6261|3117|3105|3106|445|60559|1956|51465|128486|79188|8844|10345|286
intracellular organelle part	Gene Ontology	GO:0044446	36	7986	5.85231e-08	2.71654e-06	1307|9092|4619|7138|88|64783|3304|154810|399687|10345|6261|3105|3106|2548|6202|79188|8844|55174|65083|60559|445|4621|1956|51465|4626|3339|7846|7273|58|3119|3117|63875|7352|128486|79026|8886
membrane	Gene Ontology	GO:0016020	38	8805	6.08985e-08	2.77632e-06	53354|64783|59084|88|274|154810|137735|10345|2887|6261|3105|3106|2548|63875|6283|60559|6202|79188|8844|286|399687|84889|445|1956|51465|6443|3339|57661|3119|2318|3117|5420|56479|7352|128486|79026|8886|2690
positive regulation of biological process	Gene Ontology	GO:0048518	28	5067	6.26083e-08	2.80419e-06	1307|9092|88|64783|274|3304|154810|137735|10345|2887|3105|84033|6283|26259|8844|286|399687|8048|445|1956|378884|58|3119|3117|5420|219537|128486|2690
endomembrane system	Gene Ontology	GO:0012505	24	3788	6.47571e-08	2.85043e-06	53354|1307|9092|88|64783|399687|10345|6261|3105|3106|26259|79188|8844|286|60559|445|1956|51465|3339|7846|378884|3119|3117|128486
cytoskeleton organization	Gene Ontology	GO:0007010	13	1036	7.60875e-08	3.2924e-06	11155|84448|58|7273|8048|84033|27295|4621|88|128486|399687|10345|286
muscle fiber development	Gene Ontology	GO:0048747	5	52	8.01354e-08	3.36841e-06	7273|6443|58|2318|6261
actin cytoskeleton organization	Gene Ontology	GO:0030036	10	536	8.0483e-08	3.36841e-06	11155|84448|58|7273|8048|84033|27295|4621|88|399687
cellular macromolecule metabolic process	Gene Ontology	GO:0044260	36	8101	8.54447e-08	3.51839e-06	84448|2548|9092|88|64783|3304|137735|2887|399687|166348|84033|63875|196541|6283|8048|26259|6202|8844|55174|65083|60559|64798|4621|1956|51465|4626|3339|57661|7273|378884|219537|140458|7352|79026|8886|2690
cellular component organization	Gene Ontology	GO:0016043	30	5863	9.4445e-08	3.82727e-06	84448|1307|9092|88|274|2548|3304|399687|10345|11155|79026|84033|63875|26259|6202|79188|286|8048|64798|4621|1956|6443|3339|7273|58|2318|5420|27295|56479|128486
actin filament-based movement	Gene Ontology	GO:0030048	6	113	1.06496e-07	4.18284e-06	7273|58|7138|4621|88|4626
membrane-bounded organelle	Gene Ontology	GO:0043227	44	11806	1.8512e-07	6.95017e-06	53354|1307|9092|88|64783|274|3304|154810|399687|10345|6261|3105|3106|2548|196541|6283|8048|26259|6202|79188|8844|286|65083|2938|60559|445|4621|1956|51465|3339|7846|7273|378884|58|3119|3117|5420|219537|63875|7352|128486|79026|55174|8886
sarcolemma	Gene Ontology	GO:0042383	6	125	1.88413e-07	6.97129e-06	2318|6261|79026|274|6443|286
myosin complex	Gene Ontology	GO:0016459	5	66	2.44128e-07	8.9037e-06	4619|4621|399687|4626|7273
endoplasmic reticulum part	Gene Ontology	GO:0044432	13	1158	2.67869e-07	9.36808e-06	1307|3119|6261|3117|3105|3106|60559|1956|51465|128486|79188|8844|10345
single-multicellular organism process	Gene Ontology	GO:0044707	29	5822	3.10878e-07	1.05823e-05	84033|9092|7138|88|64783|274|3304|154810|10345|6261|3106|2548|6283|26259|8048|445|4621|1956|51465|6443|4626|3339|7273|58|5420|27295|219537|7352|2690
intracellular membrane-bounded organelle	Gene Ontology	GO:0043231	41	10674	3.3909e-07	1.13908e-05	53354|1307|9092|88|64783|274|3304|154810|399687|10345|6261|3105|3106|2548|196541|6283|8048|26259|6202|79188|8844|286|65083|60559|445|1956|51465|3339|7846|7273|378884|3119|3117|5420|219537|63875|7352|128486|79026|55174|8886
muscle organ development	Gene Ontology	GO:0007517	8	344	3.46086e-07	1.14748e-05	7273|219537|58|6261|8048|445|4621|6443
organonitrogen compound metabolic process	Gene Ontology	GO:1901564	17	2144	4.19325e-07	1.37248e-05	53354|6202|2938|60559|339896|63875|445|2766|4626|4621|1956|7352|54529|84618|3304|3339|2690
nitrogen compound metabolic process	Gene Ontology	GO:0006807	31	6685	4.84141e-07	1.52594e-05	84448|64783|53354|339896|9092|88|3304|137735|399687|8886|6283|8048|6202|84618|55174|65083|54529|2938|60559|2766|445|4621|1956|4626|3339|57661|219537|63875|7352|79026|2690
striated muscle contraction	Gene Ontology	GO:0006941	6	151	5.47744e-07	1.67881e-05	7273|7138|8048|2548|4621|4626
ATP binding	Gene Ontology	GO:0005524	14	1455	5.52369e-07	1.67881e-05	7273|58|53354|399687|8886|84033|445|4619|4621|1956|51465|4626|3304|8844
multicellular organismal process	Gene Ontology	GO:0032501	31	6781	6.66392e-07	2.00153e-05	1307|9092|4619|7138|88|64783|274|2548|3304|154810|10345|6261|3106|84033|6283|26259|8048|445|4621|1956|51465|6443|4626|3339|7273|58|5420|27295|219537|7352|2690
regulation of biological process	Gene Ontology	GO:0050789	40	10509	7.15699e-07	2.12463e-05	1307|79026|9092|7138|88|64783|274|2548|3304|154810|137735|10345|2887|6261|399687|3106|84033|140458|6283|8048|26259|8844|286|84889|445|64798|1956|51465|7273|378884|58|3119|3117|729438|5420|219537|56479|128486|3105|2690
adenyl ribonucleotide binding	Gene Ontology	GO:0032559	14	1492	7.42322e-07	2.17833e-05	7273|58|53354|399687|8886|84033|445|4619|4621|1956|51465|4626|3304|8844
adenyl nucleotide binding	Gene Ontology	GO:0030554	14	1503	8.0915e-07	2.34746e-05	7273|58|53354|399687|8886|84033|445|4619|4621|1956|51465|4626|3304|8844
purine ribonucleoside triphosphate binding	Gene Ontology	GO:0035639	15	1788	1.134e-06	3.25292e-05	7273|58|53354|399687|8886|84033|445|4619|4621|1956|51465|4626|3304|7846|8844
nucleotide binding	Gene Ontology	GO:0000166	17	2314	1.19573e-06	3.33191e-05	7273|64783|58|53354|399687|8886|84033|445|4619|4621|1956|51465|4626|84618|3304|7846|8844
nucleoside phosphate binding	Gene Ontology	GO:1901265	17	2315	1.20278e-06	3.33191e-05	7273|64783|58|53354|399687|8886|84033|445|4619|4621|1956|51465|4626|84618|3304|7846|8844
purine ribonucleoside binding	Gene Ontology	GO:0032550	15	1798	1.21466e-06	3.33191e-05	7273|58|53354|399687|8886|84033|445|4619|4621|1956|51465|4626|3304|7846|8844
cellular component assembly involved in morphogenesis	Gene Ontology	GO:0010927	7	280	1.22323e-06	3.33191e-05	11155|7273|58|8048|84033|4621|88
ribonucleoside binding	Gene Ontology	GO:0032549	15	1801	1.23984e-06	3.33191e-05	7273|58|53354|399687|8886|84033|445|4619|4621|1956|51465|4626|3304|7846|8844
purine nucleoside binding	Gene Ontology	GO:0001883	15	1801	1.23984e-06	3.33191e-05	7273|58|53354|399687|8886|84033|445|4619|4621|1956|51465|4626|3304|7846|8844
nucleoside binding	Gene Ontology	GO:0001882	15	1808	1.30045e-06	3.45837e-05	7273|58|53354|399687|8886|84033|445|4619|4621|1956|51465|4626|3304|7846|8844
calmodulin binding	Gene Ontology	GO:0005516	6	179	1.42754e-06	3.68132e-05	7273|6261|84033|4619|4621|4626
purine ribonucleotide binding	Gene Ontology	GO:0032555	15	1830	1.5087e-06	3.85171e-05	7273|58|53354|399687|8886|84033|445|4619|4621|1956|51465|4626|3304|7846|8844
purine nucleotide binding	Gene Ontology	GO:0017076	15	1843	1.64543e-06	4.1592e-05	7273|58|53354|399687|8886|84033|445|4619|4621|1956|51465|4626|3304|7846|8844
ribonucleotide binding	Gene Ontology	GO:0032553	15	1846	1.67853e-06	4.20126e-05	7273|58|53354|399687|8886|84033|445|4619|4621|1956|51465|4626|3304|7846|8844
protein complex binding	Gene Ontology	GO:0032403	10	754	1.71231e-06	4.24419e-05	7273|1307|2887|2318|4621|88|1956|274|4626|399687
localization	Gene Ontology	GO:0051179	27	5581	1.73541e-06	4.26009e-05	2548|88|274|3304|154810|137735|10345|2887|6261|399687|84033|6283|8048|6202|286|65083|84889|1956|51465|7846|7273|5420|56479|7352|128486|79026|2690
single-organism developmental process	Gene Ontology	GO:0044767	27	5604	1.8804e-06	4.52893e-05	84033|9092|88|64783|274|11155|6261|3106|2548|26259|2938|8048|445|4621|1956|51465|6443|3339|7273|58|2318|5420|27295|219537|7352|128486|2690
positive regulation of cellular process	Gene Ontology	GO:0048522	24	4559	1.92302e-06	4.58828e-05	1307|9092|88|64783|274|3304|154810|137735|10345|2887|399687|84033|6283|26259|8844|286|8048|445|1956|378884|3119|3117|5420|2690
endoplasmic reticulum membrane	Gene Ontology	GO:0005789	11	981	2.47397e-06	5.79453e-05	3119|6261|3117|3105|3106|60559|1956|51465|128486|8844|10345
single-organism metabolic process	Gene Ontology	GO:0044710	22	3962	2.52365e-06	5.85717e-05	53354|339896|88|3304|2887|2548|6283|54529|84618|8844|2938|2766|445|4621|1956|51465|4626|3339|378884|7352|128486|2690
developmental process	Gene Ontology	GO:0032502	27	5693	2.55387e-06	5.87391e-05	84033|9092|88|64783|274|11155|6261|3106|2548|26259|2938|8048|445|4621|1956|51465|6443|3339|7273|58|2318|5420|27295|219537|7352|128486|2690
nuclear outer membrane-endoplasmic reticulum membrane network	Gene Ontology	GO:0042175	11	1002	3.02254e-06	6.88978e-05	3119|6261|3117|3105|3106|60559|1956|51465|128486|8844|10345
small molecule binding	Gene Ontology	GO:0036094	17	2487	3.16042e-06	6.96331e-05	7273|64783|58|53354|399687|8886|84033|445|4619|4621|1956|51465|4626|84618|3304|7846|8844
response to stimulus	Gene Ontology	GO:0050896	33	8081	3.16158e-06	6.96331e-05	1307|9092|7138|88|64783|3304|154810|137735|10345|2887|6261|3105|3106|84033|6283|8048|8844|286|84889|2766|445|64798|1956|51465|7273|58|3119|3117|729438|219537|140458|7352|2690
biological regulation	Gene Ontology	GO:0065007	40	11110	3.29762e-06	7.19557e-05	1307|79026|9092|7138|88|64783|274|2548|3304|154810|137735|10345|2887|6261|399687|3106|84033|140458|6283|8048|26259|8844|286|84889|445|64798|1956|51465|7273|378884|58|3119|3117|729438|5420|219537|56479|128486|3105|2690
heart development	Gene Ontology	GO:0007507	8	493	4.77533e-06	0.000101595	7273|64783|6261|8048|2548|27295|88|6443
cellular nitrogen compound metabolic process	Gene Ontology	GO:0034641	28	6259	4.82383e-06	0.000101779	84448|64783|53354|9092|88|3304|137735|399687|8886|6283|8048|6202|84618|55174|65083|2938|60559|2766|445|4621|1956|4626|57661|219537|63875|7352|79026|2690
plasma membrane protein complex	Gene Ontology	GO:0098797	8	502	5.438e-06	0.000111961	3119|3117|3105|3106|56479|1956|6443|10345
integral component of endoplasmic reticulum membrane	Gene Ontology	GO:0030176	5	130	5.91986e-06	0.000120907	3117|3105|3106|128486|3119
catalytic activity	Gene Ontology	GO:0003824	26	5590	6.14374e-06	0.000124484	53354|2548|339896|59084|4619|3304|54858|166348|84033|196541|26259|54529|84618|8844|2938|60559|2766|445|4621|1956|51465|4626|7846|7273|378884|8886
intrinsic component of endoplasmic reticulum membrane	Gene Ontology	GO:0031227	5	135	7.06779e-06	0.000142079	3117|3105|3106|128486|3119
cellular response to interferon-gamma	Gene Ontology	GO:0071346	5	138	7.83583e-06	0.000156288	3117|3105|3106|445|3119
anatomical structure development	Gene Ontology	GO:0048856	25	5313	8.19918e-06	0.000161019	84033|9092|88|64783|274|11155|6261|3106|2548|26259|2938|8048|445|4621|1956|51465|6443|3339|7273|58|2318|5420|27295|219537|128486
coated vesicle membrane	Gene Ontology	GO:0030662	5	140	8.38307e-06	0.000162695	3117|3105|3106|1956|3119
cell periphery	Gene Ontology	GO:0071944	24	4962	8.41194e-06	0.000162695	53354|59084|88|274|154810|137735|10345|2887|6261|3105|3106|6283|286|84889|1956|6443|3339|3119|2318|3117|5420|56479|79026|2690
cardiovascular system development	Gene Ontology	GO:0072358	10	919	9.5535e-06	0.000182016	7273|64783|6261|8048|2548|27295|88|26259|3339|6443
circulatory system development	Gene Ontology	GO:0072359	10	919	9.5535e-06	0.000182016	7273|64783|6261|8048|2548|27295|88|26259|3339|6443
cell development	Gene Ontology	GO:0048468	14	1870	9.91223e-06	0.00018654	11155|7273|58|2318|6261|8048|84033|5420|4621|88|274|26259|51465|6443
focal adhesion	Gene Ontology	GO:0005925	7	388	9.9371e-06	0.00018654	2318|79026|88|1956|6202|3304|3339
cell-substrate adherens junction	Gene Ontology	GO:0005924	7	391	1.0435e-05	0.000194023	2318|79026|88|1956|6202|3304|3339
cellular component biogenesis	Gene Ontology	GO:0044085	17	2724	1.04877e-05	0.000194023	11155|7273|1307|58|2318|8048|79026|84033|56479|9092|5420|4621|88|65083|274|6202|3304
cell-substrate junction	Gene Ontology	GO:0030055	7	395	1.11309e-05	0.000202979	2318|79026|88|1956|6202|3304|3339
carbohydrate derivative binding	Gene Ontology	GO:0097367	15	2174	1.19598e-05	0.000216549	7273|58|53354|399687|8886|84033|445|4619|4621|1956|51465|4626|3304|7846|8844
cellular protein metabolic process	Gene Ontology	GO:0044267	23	4725	1.25823e-05	0.00022256	88|3304|166348|84033|63875|196541|6283|26259|6202|8844|60559|64798|4621|1956|51465|4626|3339|7273|378884|219537|140458|7352|2690
endocytic vesicle membrane	Gene Ontology	GO:0030666	5	153	1.27091e-05	0.00022256	3117|3105|3106|1956|3119
vacuole	Gene Ontology	GO:0005773	11	1169	1.27198e-05	0.00022256	53354|3119|3117|3105|3106|2548|445|1956|79026|3339|7846
response to interferon-gamma	Gene Ontology	GO:0034341	5	160	1.56674e-05	0.000267947	3117|3105|3106|445|3119
anatomical structure morphogenesis	Gene Ontology	GO:0009653	16	2513	1.57431e-05	0.000267947	11155|7273|2548|58|219537|8048|84033|5420|64783|4621|88|1956|26259|3339|6261|128486
plasma membrane part	Gene Ontology	GO:0044459	16	2516	1.59754e-05	0.0002701	154810|3119|6261|84889|3105|3106|5420|3117|56479|1956|274|6443|79026|286|10345|2690
regulation of cellular process	Gene Ontology	GO:0050794	36	9997	1.65058e-05	0.000277232	1307|9092|88|64783|274|3304|154810|137735|10345|2887|6261|3105|3106|84033|6283|8048|26259|8844|286|399687|84889|445|64798|1956|51465|7273|378884|3119|3117|729438|5420|219537|140458|128486|79026|2690
protein metabolic process	Gene Ontology	GO:0019538	24	5191	1.80658e-05	0.000300872	88|3304|54858|166348|84033|63875|196541|6283|26259|6202|8844|60559|64798|4621|1956|51465|4626|3339|7273|378884|219537|140458|7352|2690
single-organism localization	Gene Ontology	GO:1902578	17	2861	1.97477e-05	0.000324375	7273|65083|1956|2887|6261|84889|399687|2548|56479|6283|88|7352|6202|286|137735|10345|2690
plasma membrane	Gene Ontology	GO:0005886	23	4859	1.98336e-05	0.000324375	59084|88|274|154810|137735|10345|2887|6261|3105|3106|6283|286|84889|1956|6443|3339|3119|2318|3117|5420|56479|79026|2690
cellular response to stimulus	Gene Ontology	GO:0051716	28	6741	2.01675e-05	0.000325871	1307|9092|88|64783|3304|154810|137735|10345|2887|6261|3105|3106|84033|6283|8844|286|84889|445|64798|1956|51465|58|3119|3117|729438|140458|7352|2690
cellular developmental process	Gene Ontology	GO:0048869	20	3837	2.09713e-05	0.000336728	11155|7273|64783|58|2318|6261|8048|3106|84033|5420|9092|4621|88|1956|274|26259|2938|51465|6443|128486
membrane protein complex	Gene Ontology	GO:0098796	10	1028	2.47344e-05	0.000394669	53354|3119|3117|3105|3106|60559|56479|1956|6443|10345
regulation of response to stimulus	Gene Ontology	GO:0048583	19	3560	2.58065e-05	0.000406691	2887|3119|7138|84889|8844|3106|84033|729438|6283|3117|88|1956|51465|3105|3304|64798|137735|10345|2690
organelle organization	Gene Ontology	GO:0006996	19	3604	3.05751e-05	0.0004706	11155|84448|2548|58|7273|8048|84033|63875|27295|128486|4621|88|274|26259|79188|3304|399687|10345|286
single-organism transport	Gene Ontology	GO:0044765	16	2654	3.05992e-05	0.0004706	7273|65083|1956|2887|6261|84889|399687|56479|6283|88|7352|6202|286|137735|10345|2690
adherens junction	Gene Ontology	GO:0005912	7	466	3.1505e-05	0.00048163	2318|79026|88|1956|6202|3304|3339
cellular response to organonitrogen compound	Gene Ontology	GO:0071417	7	477	3.64402e-05	0.000553761	1307|2887|6261|445|88|1956|2690
vesicle	Gene Ontology	GO:0031982	19	3652	3.66674e-05	0.000553917	2938|7273|154810|58|3119|6261|3117|3105|3106|2548|5420|445|4621|88|1956|6202|79026|3339|7846
phosphate-containing compound metabolic process	Gene Ontology	GO:0006796	17	3008	3.72819e-05	0.000559886	7273|2887|219537|84033|53354|2766|6283|4621|88|1956|128486|4626|84618|3304|64798|8844|2690
phosphorus metabolic process	Gene Ontology	GO:0006793	17	3016	3.85471e-05	0.000575502	7273|2887|219537|84033|53354|2766|6283|4621|88|1956|128486|4626|84618|3304|64798|8844|2690
striated muscle tissue development	Gene Ontology	GO:0014706	6	326	3.97745e-05	0.000590373	7273|58|6261|8048|88|6443
anchoring junction	Gene Ontology	GO:0070161	7	486	4.09359e-05	0.000604101	2318|79026|88|1956|6202|3304|3339
organonitrogen compound biosynthetic process	Gene Ontology	GO:1901566	11	1335	4.24637e-05	0.000623046	53354|1956|2938|339896|2766|445|63875|7352|6202|3339|54529
RNA processing	Gene Ontology	GO:0006396	9	884	4.59657e-05	0.000670573	57661|65083|79026|9092|64783|1956|6202|3304|55174
muscle tissue development	Gene Ontology	GO:0060537	6	339	4.92129e-05	0.000706352	7273|58|6261|8048|88|6443
cellular component assembly	Gene Ontology	GO:0022607	15	2458	4.93766e-05	0.000706352	11155|7273|1307|58|2318|8048|79026|84033|56479|9092|5420|4621|88|274|3304
extracellular region	Gene Ontology	GO:0005576	21	4424	4.95249e-05	0.000706352	7273|1307|58|2938|6261|3105|3106|59084|5420|445|6283|4621|88|1956|2548|6202|79026|3304|7846|3339|2690
vacuolar part	Gene Ontology	GO:0044437	8	690	5.12707e-05	0.000723309	3119|3117|3105|3106|2548|1956|79026|3339
extracellular region part	Gene Ontology	GO:0044421	19	3743	5.12804e-05	0.000723309	7273|1307|58|2938|6261|3105|3106|2548|5420|445|4621|88|1956|6202|79026|3304|7846|3339|2690
animal organ development	Gene Ontology	GO:0048513	17	3087	5.15658e-05	0.000723338	7273|64783|58|219537|8048|3106|2548|5420|9092|445|4621|88|1956|26259|27295|6261|6443
anatomical structure formation involved in morphogenesis	Gene Ontology	GO:0048646	10	1129	5.40136e-05	0.000753533	11155|7273|64783|58|8048|84033|5420|4621|88|3339
transport	Gene Ontology	GO:0006810	21	4456	5.50336e-05	0.000760571	7273|7846|1956|2887|6261|84889|137735|56479|6283|88|7352|274|6202|79026|65083|51465|3304|286|399687|10345|2690
organelle membrane	Gene Ontology	GO:0031090	15	2482	5.51138e-05	0.000760571	64783|1956|3119|6261|3117|3105|3106|2548|445|63875|7352|79026|79188|399687|10345
small molecule metabolic process	Gene Ontology	GO:0044281	13	1910	5.70869e-05	0.000783563	53354|2887|339896|2548|2766|445|4626|4621|7352|54529|84618|3304|2690
system process	Gene Ontology	GO:0003008	13	1918	5.95501e-05	0.000813002	7273|58|219537|8048|2548|6261|4619|4621|88|1956|4626|7138|10345
single organism signaling	Gene Ontology	GO:0044700	25	5972	6.12322e-05	0.00083152	1307|9092|88|64783|3304|154810|137735|10345|2887|6261|3105|3106|84033|140458|6283|8844|286|84889|64798|1956|3119|3117|729438|56479|2690
signaling	Gene Ontology	GO:0023052	25	5978	6.22659e-05	0.000841084	1307|9092|88|64783|3304|154810|137735|10345|2887|6261|3105|3106|84033|140458|6283|8844|286|84889|64798|1956|3119|3117|729438|56479|2690
cell junction	Gene Ontology	GO:0030054	10	1150	6.28758e-05	0.000844852	2318|79026|5420|4619|88|1956|6202|3304|154810|3339
organic substance biosynthetic process	Gene Ontology	GO:1901576	25	5991	6.45601e-05	0.000858448	84448|64783|53354|339896|88|3304|137735|2887|6283|6202|55174|54529|2938|8048|2766|445|1956|51465|3339|57661|378884|219537|63875|7352|128486
cell communication	Gene Ontology	GO:0007154	25	6000	6.6193e-05	0.0008756	1307|59084|9092|88|64783|3304|154810|137735|10345|2887|729438|3105|3106|84033|140458|6283|8844|286|84889|64798|1956|3119|3117|56479|2690
cell differentiation	Gene Ontology	GO:0030154	18	3519	7.70673e-05	0.0010024	11155|7273|64783|58|2318|6261|8048|3106|84033|5420|9092|4621|88|274|26259|2938|51465|6443
membrane-bounded vesicle	Gene Ontology	GO:0031988	18	3520	7.73491e-05	0.0010024	2938|7273|58|3119|6261|3117|3105|3106|2548|5420|445|4621|88|1956|6202|79026|3339|7846
single-organism organelle organization	Gene Ontology	GO:1902589	12	1702	8.19123e-05	0.00105617	11155|84448|58|7273|8048|84033|27295|4621|88|3304|399687|10345
establishment of localization	Gene Ontology	GO:0051234	21	4583	8.27448e-05	0.00106155	7273|7846|1956|2887|6261|84889|137735|56479|6283|88|7352|274|6202|79026|65083|51465|3304|286|399687|10345|2690
biosynthetic process	Gene Ontology	GO:0009058	25	6087	8.40185e-05	0.0010725	84448|64783|53354|339896|88|3304|137735|2887|6283|6202|55174|54529|2938|8048|2766|445|1956|51465|3339|57661|378884|219537|63875|7352|128486
regulation of multicellular organismal process	Gene Ontology	GO:0051239	15	2581	8.54783e-05	0.0010857	64783|7138|8048|3106|2548|6261|9092|219537|51465|26259|274|3304|154810|10345|2690
coated vesicle	Gene Ontology	GO:0030135	5	232	8.78635e-05	0.00111047	3117|3105|3106|1956|3119
cellular response to nitrogen compound	Gene Ontology	GO:1901699	7	553	9.08457e-05	0.00114251	1307|2887|6261|445|88|1956|2690
tissue development	Gene Ontology	GO:0009888	12	1723	9.19172e-05	0.00114523	7273|64783|58|2938|6261|8048|2548|5420|88|1956|26259|6443
intracellular signal transduction	Gene Ontology	GO:0035556	15	2598	9.19593e-05	0.00114523	154810|729438|84889|8844|84033|88|9092|6283|140458|1956|3304|64798|137735|10345|2690
enzyme binding	Gene Ontology	GO:0019899	12	1743	0.00010241	0.00126625	11155|7273|6261|219537|1956|274|51465|3304|286|8844|57661|2690
peptide binding	Gene Ontology	GO:0042277	5	240	0.000102669	0.00126625	3117|3105|3106|3119|2690
macromolecular complex binding	Gene Ontology	GO:0044877	10	1232	0.000110364	0.00134813	7273|1307|2887|2318|4621|88|1956|274|4626|399687
membrane organization	Gene Ontology	GO:0061024	9	1004	0.000119992	0.00145185	88|1956|6443|6202|79188|3304|399687|10345|286
organelle assembly	Gene Ontology	GO:0070925	7	581	0.00012282	0.00147557	11155|7273|58|8048|84033|4621|88
cellular component morphogenesis	Gene Ontology	GO:0032989	10	1250	0.000124112	0.00147557	11155|7273|58|8048|84033|4621|88|1956|26259|128486
vacuolar membrane	Gene Ontology	GO:0005774	7	586	0.000129391	0.00152229	3119|3117|3105|3106|2548|1956|79026
heart contraction	Gene Ontology	GO:0060047	5	253	0.000130732	0.001531	8048|7273|2548|10345|6261
endocytic vesicle	Gene Ontology	GO:0030139	5	254	0.000133111	0.00154469	3117|3105|3106|1956|3119
response to organonitrogen compound	Gene Ontology	GO:0010243	8	796	0.000136276	0.00157426	1307|1956|6261|445|88|7352|2690|2887
heart process	Gene Ontology	GO:0003015	5	256	0.000137969	0.00158664	8048|7273|2548|10345|6261
cellular biosynthetic process	Gene Ontology	GO:0044249	24	5886	0.000139019	0.00159155	84448|64783|53354|339896|88|3304|137735|2887|6283|6202|55174|54529|2938|8048|2766|445|1956|51465|57661|378884|219537|63875|7352|128486
amide binding	Gene Ontology	GO:0033218	5	260	0.000148092	0.00167863	3117|3105|3106|3119|2690
protein modification process	Gene Ontology	GO:0036211	18	3707	0.000149255	0.00167863	7273|378884|219537|166348|84033|88|196541|6283|4621|140458|1956|51465|26259|4626|3304|64798|8844|2690
cellular protein modification process	Gene Ontology	GO:0006464	18	3707	0.000149255	0.00167863	7273|378884|219537|166348|84033|88|196541|6283|4621|140458|1956|51465|26259|4626|3304|64798|8844|2690
regulation of localization	Gene Ontology	GO:0032879	14	2405	0.00015027	0.00168262	2887|6261|79026|56479|5420|88|1956|274|128486|51465|3304|154810|399687|10345
signal transduction	Gene Ontology	GO:0007165	23	5542	0.00015547	0.00173007	1307|9092|88|64783|3304|154810|137735|10345|2887|729438|3105|3106|84033|6283|8844|286|84889|64798|1956|3119|3117|140458|2690
extracellular exosome	Gene Ontology	GO:0070062	15	2738	0.000163931	0.00181175	7273|58|2938|6261|3105|3106|2548|5420|445|4621|88|6202|79026|3339|7846
extracellular vesicle	Gene Ontology	GO:1903561	15	2751	0.000172614	0.00189885	7273|58|2938|6261|3105|3106|2548|5420|445|4621|88|6202|79026|3339|7846
extracellular organelle	Gene Ontology	GO:0043230	15	2752	0.000173299	0.00189885	7273|58|2938|6261|3105|3106|2548|5420|445|4621|88|6202|79026|3339|7846
cellular response to organic substance	Gene Ontology	GO:0071310	13	2149	0.000184221	0.00200135	1307|1956|2887|3119|6261|3117|3105|3106|445|88|7352|3304|2690
response to organic substance	Gene Ontology	GO:0010033	15	2810	0.00021727	0.00231121	1307|1956|58|3119|6261|3117|3105|3106|445|88|7352|51465|3304|2690|2887
system development	Gene Ontology	GO:0048731	19	4206	0.000239346	0.002525	7273|64783|58|219537|8048|3106|2548|5420|9092|445|4621|88|1956|274|26259|27295|3339|6261|6443
heterocycle metabolic process	Gene Ontology	GO:0046483	23	5717	0.000247654	0.00258065	84448|64783|53354|9092|88|3304|137735|79026|8886|6283|6202|84618|55174|65083|399687|8048|2766|4621|1956|4626|57661|219537|2690
macromolecule modification	Gene Ontology	GO:0043412	18	3871	0.000255625	0.00265288	7273|378884|219537|166348|84033|88|196541|6283|4621|140458|1956|51465|26259|4626|3304|64798|8844|2690
regulation of blood circulation	Gene Ontology	GO:1903522	5	297	0.000270997	0.00278974	8048|219537|2548|10345|6261
regulation of intracellular signal transduction	Gene Ontology	GO:1902531	11	1662	0.000286902	0.00292984	729438|84889|8844|84033|6283|1956|3304|64798|137735|10345|2690
cellular response to chemical stimulus	Gene Ontology	GO:0070887	14	2587	0.00031739	0.00321546	1307|1956|2887|3119|6261|3117|3105|3106|445|6283|88|7352|3304|2690
response to nitrogen compound	Gene Ontology	GO:1901698	8	904	0.000319061	0.00321619	1307|1956|6261|445|88|7352|2690|2887
bounding membrane of organelle	Gene Ontology	GO:0098588	11	1694	0.00033703	0.00334801	3119|6261|3117|3105|3106|2548|445|1956|79026|399687|10345
cellular response to cytokine stimulus	Gene Ontology	GO:0071345	7	689	0.000342279	0.00338697	3119|3117|3105|3106|445|3304|2690
cellular amide metabolic process	Gene Ontology	GO:0043603	8	917	0.000350575	0.00345567	1956|2938|60559|445|63875|7352|6202|2690
Golgi apparatus	Gene Ontology	GO:0005794	10	1431	0.000363675	0.00355751	3119|3117|3105|3106|9092|1956|26259|79188|3339|399687
blood circulation	Gene Ontology	GO:0008015	6	493	0.000363694	0.00355751	7273|6261|8048|2548|219537|10345
movement of cell or subcellular component	Gene Ontology	GO:0006928	11	1715	0.000373798	0.00362854	7273|58|7138|5420|6283|4621|88|1956|4626|154810|399687
circulatory system process	Gene Ontology	GO:0003013	6	497	0.000379384	0.00366881	7273|6261|8048|2548|219537|10345
response to chemical	Gene Ontology	GO:0042221	18	4014	0.000397806	0.00383245	7273|1307|1956|58|3119|6261|3117|3105|3106|445|6283|219537|88|7352|51465|3304|2690|2887
regulation of system process	Gene Ontology	GO:0044057	6	506	0.000416626	0.00395408	6261|8048|2548|219537|7138|10345
multicellular organism development	Gene Ontology	GO:0007275	20	4770	0.000421848	0.00398881	7273|2548|64783|58|219537|8048|3106|84033|5420|9092|445|4621|88|1956|274|26259|27295|3339|6261|6443
organic cyclic compound metabolic process	Gene Ontology	GO:1901360	23	5932	0.000425609	0.00400952	84448|64783|53354|9092|88|3304|137735|79026|8886|6283|6202|84618|55174|65083|399687|8048|2766|4621|1956|4626|57661|219537|2690
cytoskeletal part	Gene Ontology	GO:0044430	10	1468	0.000443636	0.00416398	7273|58|7138|4619|4621|88|4626|3304|7846|399687
lysosome	Gene Ontology	GO:0005764	6	515	0.000456669	0.00425502	3119|3117|79026|2548|445|3339
lytic vacuole	Gene Ontology	GO:0000323	6	515	0.000456669	0.00425502	3119|3117|79026|2548|445|3339
identical protein binding	Gene Ontology	GO:0042802	9	1210	0.000468864	0.004337	7273|729438|445|88|1956|274|54529|154810|2690
nucleobase-containing compound metabolic process	Gene Ontology	GO:0006139	22	5592	0.000486169	0.00448083	84448|64783|53354|9092|88|3304|399687|79026|8886|6283|6202|84618|55174|137735|65083|8048|2766|4621|1956|4626|57661|219537
purine ribonucleoside metabolic process	Gene Ontology	GO:0046128	5	340	0.000497353	0.00455104	84618|4621|3304|4626|53354
endomembrane system organization	Gene Ontology	GO:0010256	6	526	0.000509626	0.00461826	88|26259|79188|399687|10345|286
purine nucleoside metabolic process	Gene Ontology	GO:0042278	5	343	0.000517226	0.00465454	84618|4621|3304|4626|53354
cellular localization	Gene Ontology	GO:0051641	13	2394	0.000517779	0.00465454	2548|6261|8048|84033|88|1956|51465|6202|65083|7846|137735|10345|286
purine nucleotide metabolic process	Gene Ontology	GO:0006163	6	528	0.000519748	0.00465585	53354|2766|4621|4626|84618|3304
negative regulation of biological process	Gene Ontology	GO:0048519	19	4494	0.000552261	0.00489556	64783|2887|7138|8048|3106|6261|5420|9092|64798|219537|88|1956|274|445|729438|51465|3304|399687|10345
membrane part	Gene Ontology	GO:0044425	24	6452	0.000563574	0.00497856	53354|59084|274|154810|10345|6261|3105|3106|60559|79188|8844|286|84889|1956|51465|6443|3119|3117|5420|56479|7352|128486|79026|2690
cytokine-mediated signaling pathway	Gene Ontology	GO:0019221	6	543	0.000600755	0.00525249	3119|3117|3105|3106|3304|2690
purine-containing compound metabolic process	Gene Ontology	GO:0072521	6	558	0.000691259	0.00594272	53354|2766|4621|4626|84618|3304
ribonucleoside metabolic process	Gene Ontology	GO:0009119	5	370	0.000724108	0.00616216	84618|4621|3304|4626|53354
ion binding	Gene Ontology	GO:0043167	18	4228	0.000738665	0.00619456	11155|84448|84033|378884|7273|8048|339896|59084|2766|445|6283|88|6261|84618|27295|3339|8844|57661
cellular aromatic compound metabolic process	Gene Ontology	GO:0006725	22	5765	0.000740047	0.00619456	84448|64783|53354|9092|88|3304|399687|79026|8886|6283|6202|84618|55174|137735|65083|8048|2766|4621|1956|4626|57661|219537
regulation of cell-cell adhesion	Gene Ontology	GO:0022407	5	375	0.000768359	0.00641052	3117|9092|5420|3119|445
endosome	Gene Ontology	GO:0005768	7	792	0.000774459	0.00644037	53354|3119|3117|3105|3106|1956|7846
positive regulation of cell adhesion	Gene Ontology	GO:0045785	5	377	0.000786614	0.00651439	3117|1307|9092|5420|3119
response to cytokine	Gene Ontology	GO:0034097	7	797	0.000803158	0.00661439	3119|3117|3105|3106|445|3304|2690
innate immune response	Gene Ontology	GO:0045087	7	798	0.000808998	0.00661978	3119|3117|3105|3106|445|6283|3304
positive regulation of response to stimulus	Gene Ontology	GO:0048584	11	1903	0.000881724	0.00708911	2887|3119|3117|8844|6283|1956|3105|3304|137735|10345|2690
nucleoside metabolic process	Gene Ontology	GO:0009116	5	392	0.000934048	0.00742873	84618|4621|3304|4626|53354
organophosphate metabolic process	Gene Ontology	GO:0019637	8	1073	0.000969872	0.0076897	53354|2766|4621|1956|128486|4626|84618|3304
whole membrane	Gene Ontology	GO:0098805	9	1344	0.00098312	0.0077706	3119|3117|3105|3106|2548|5420|445|1956|79026
endosome membrane	Gene Ontology	GO:0010008	5	397	0.000987486	0.00777895	3117|3105|3106|1956|3119
cytoplasmic vesicle part	Gene Ontology	GO:0044433	6	604	0.00103598	0.00808823	3119|3117|3105|3106|88|1956
response to peptide hormone	Gene Ontology	GO:0043434	5	405	0.00107768	0.00838814	88|7352|2887|445|2690
glycosyl compound metabolic process	Gene Ontology	GO:1901657	5	414	0.0011863	0.00920558	84618|4621|3304|4626|53354
single-organism membrane organization	Gene Ontology	GO:0044802	7	857	0.00121788	0.00942195	88|1956|6202|79188|3304|10345|286
regulation of cell adhesion	Gene Ontology	GO:0030155	6	629	0.00127183	0.00972151	1307|3119|3117|5420|9092|445
response to abiotic stimulus	Gene Ontology	GO:0009628	8	1122	0.00128639	0.00980347	7273|58|6261|8048|2766|1956|7352|3304
regulation of signal transduction	Gene Ontology	GO:0009966	13	2663	0.00137657	0.0104285	2887|729438|84889|8844|84033|6283|88|1956|3304|64798|137735|10345|2690
regulation of signaling	Gene Ontology	GO:0023051	14	3006	0.00138154	0.0104351	2887|6261|84889|8844|84033|729438|6283|88|1956|3304|64798|137735|10345|2690
endosomal part	Gene Ontology	GO:0044440	5	430	0.00139918	0.0105062	3117|3105|3106|1956|3119
positive regulation of intracellular signal transduction	Gene Ontology	GO:1902533	7	882	0.00143371	0.0107339	8844|6283|1956|3304|137735|10345|2690
Golgi apparatus part	Gene Ontology	GO:0044431	7	886	0.00147086	0.0109478	3119|3117|3105|3106|1956|3339|399687
nucleotide metabolic process	Gene Ontology	GO:0009117	6	650	0.00150003	0.0111042	53354|2766|4621|4626|84618|3304
response to peptide	Gene Ontology	GO:1901652	5	440	0.00154581	0.0114059	88|7352|2887|445|2690
nucleoside phosphate metabolic process	Gene Ontology	GO:0006753	6	658	0.00159473	0.0115992	53354|2766|4621|4626|84618|3304
heterocyclic compound binding	Gene Ontology	GO:1901363	21	5701	0.00160039	0.0116074	7273|65083|64783|58|53354|399687|8886|84033|9092|4619|4621|1956|51465|445|6202|79026|84618|3304|7846|8844|4626
cellular response to endogenous stimulus	Gene Ontology	GO:0071495	8	1170	0.00167168	0.0120277	1307|1956|6261|445|88|7352|2690|2887
poly(A) RNA binding	Gene Ontology	GO:0044822	8	1175	0.00171658	0.0123102	65083|79026|8886|445|64783|9092|6202|399687
negative regulation of cellular process	Gene Ontology	GO:0048523	17	4171	0.00172401	0.0123288	64783|2887|6261|8048|729438|5420|9092|64798|219537|88|1956|274|445|51465|3304|399687|10345
Golgi membrane	Gene Ontology	GO:0000139	6	676	0.00182444	0.0129743	3119|3117|3105|3106|1956|399687
regulation of transport	Gene Ontology	GO:0051049	10	1774	0.0018484	0.0131082	2887|79026|56479|88|1956|274|51465|3304|399687|10345
negative regulation of transport	Gene Ontology	GO:0051051	5	461	0.0018902	0.0132573	3304|10345|51465|2887|88
organic cyclic compound binding	Gene Ontology	GO:0097159	21	5780	0.00190313	0.0133114	7273|65083|64783|58|53354|399687|8886|84033|9092|4619|4621|1956|51465|445|6202|79026|84618|3304|7846|8844|4626
single organismal cell-cell adhesion	Gene Ontology	GO:0016337	6	696	0.00210828	0.0145472	3119|3117|5420|9092|1956|445
cytoplasmic vesicle membrane	Gene Ontology	GO:0030659	5	478	0.00220773	0.0151108	3117|3105|3106|1956|3119
organ morphogenesis	Gene Ontology	GO:0009887	7	963	0.00234472	0.0158036	7273|64783|58|6261|2548|219537|1956
nucleobase-containing small molecule metabolic process	Gene Ontology	GO:0055086	6	712	0.00235847	0.0158036	53354|2766|4621|4626|84618|3304
response to endogenous stimulus	Gene Ontology	GO:0009719	9	1544	0.00252679	0.0167556	1307|1956|58|6261|445|88|7352|2690|2887
ribonucleoprotein complex	Gene Ontology	GO:1990904	6	723	0.00254306	0.0167721	65083|9092|4619|63875|6202|7846
intracellular ribonucleoprotein complex	Gene Ontology	GO:0030529	6	723	0.00254306	0.0167721	65083|9092|4619|63875|6202|7846
vesicle membrane	Gene Ontology	GO:0012506	5	497	0.00260689	0.0170214	3117|3105|3106|1956|3119
phosphorylation	Gene Ontology	GO:0016310	11	2190	0.00267318	0.0173655	7273|2887|53354|84033|6283|219537|88|1956|64798|8844|2690
integral component of plasma membrane	Gene Ontology	GO:0005887	9	1562	0.00272894	0.0175873	6261|84889|3105|3106|5420|3117|56479|6443|2690
intracellular organelle lumen	Gene Ontology	GO:0070013	17	4356	0.00273519	0.0175873	7273|1307|8886|2548|88|9092|64783|63875|1956|6202|79188|3304|65083|399687|3339|10345|55174
membrane-enclosed lumen	Gene Ontology	GO:0031974	17	4357	0.00274178	0.0175873	7273|1307|8886|2548|88|9092|64783|63875|1956|6202|79188|3304|65083|399687|3339|10345|55174
organelle lumen	Gene Ontology	GO:0043233	17	4357	0.00274178	0.0175873	7273|1307|8886|2548|88|9092|64783|63875|1956|6202|79188|3304|65083|399687|3339|10345|55174
nucleoside-triphosphatase activity	Gene Ontology	GO:0017111	6	736	0.00277501	0.0177559	8886|4619|4621|4626|3304|7846
nucleus	Gene Ontology	GO:0005634	23	6803	0.00282339	0.0180203	53354|64783|9092|274|3304|154810|399687|79026|8886|196541|6283|6202|79188|286|65083|8048|445|1956|7846|7273|378884|219537|55174
single organism cell adhesion	Gene Ontology	GO:0098602	6	745	0.00294467	0.0187009	3119|3117|5420|9092|1956|445
single-organism biosynthetic process	Gene Ontology	GO:0044711	8	1295	0.00311412	0.0195821	53354|378884|2887|2938|339896|445|128486|54529
protein ubiquitination	Gene Ontology	GO:0016567	6	755	0.00314219	0.0197101	378884|166348|140458|51465|26259|3304
metal ion binding	Gene Ontology	GO:0046872	16	4039	0.00321316	0.0200576	11155|84448|84033|378884|7273|8048|59084|2766|27295|6283|88|6261|84618|3339|8844|57661
cell surface receptor signaling pathway	Gene Ontology	GO:0007166	12	2583	0.0032133	0.0200576	1307|2887|3119|3117|3105|3106|64798|64783|1956|3304|154810|2690
regulation of cell communication	Gene Ontology	GO:0010646	13	2955	0.00342299	0.0210561	2887|729438|84889|8844|84033|6283|88|1956|3304|64798|137735|10345|2690
intrinsic component of plasma membrane	Gene Ontology	GO:0031226	9	1619	0.00345533	0.0211546	6261|84889|3105|3106|5420|3117|56479|6443|2690
transferase activity	Gene Ontology	GO:0016740	11	2269	0.00350137	0.0213341	7273|378884|2938|53354|166348|84033|196541|1956|51465|26259|8844
cation binding	Gene Ontology	GO:0043169	16	4078	0.0035341	0.0214415	11155|84448|84033|378884|7273|8048|59084|2766|27295|6283|88|6261|84618|3339|8844|57661
pyrophosphatase activity	Gene Ontology	GO:0016462	6	776	0.0035891	0.0216108	8886|4619|4621|4626|3304|7846
hydrolase activity, acting on acid anhydrides, in phosphorus-containing anhydrides	Gene Ontology	GO:0016818	6	778	0.003634	0.0218297	8886|4619|4621|4626|3304|7846
hydrolase activity, acting on acid anhydrides	Gene Ontology	GO:0016817	6	780	0.00367933	0.0220501	8886|4619|4621|4626|3304|7846
peptide metabolic process	Gene Ontology	GO:0006518	6	781	0.00370215	0.0221349	1956|2938|60559|63875|7352|6202
negative regulation of response to stimulus	Gene Ontology	GO:0048585	8	1355	0.00408509	0.024254	2887|729438|3106|64798|1956|51465|3304|10345
macromolecule biosynthetic process	Gene Ontology	GO:0009059	18	4981	0.00460945	0.0268062	57661|84448|64783|1956|2887|8048|63875|6283|219537|88|7352|51465|6202|378884|3304|137735|3339|55174
positive regulation of signal transduction	Gene Ontology	GO:0009967	8	1385	0.00465118	0.0269874	2887|8844|6283|1956|3304|137735|10345|2690
hydrolase activity	Gene Ontology	GO:0016787	11	2382	0.00503433	0.0286717	2548|54858|60559|8886|59084|4619|4621|4626|84618|3304|7846
macromolecule localization	Gene Ontology	GO:0033036	12	2734	0.00505377	0.0286717	65083|8048|399687|84033|6283|88|1956|51465|128486|6202|137735|286
positive regulation of multicellular organismal process	Gene Ontology	GO:0051240	8	1407	0.00510345	0.0288894	9092|219537|274|26259|3304|154810|10345|2690
cell adhesion	Gene Ontology	GO:0007155	8	1421	0.00540842	0.0304134	1307|3119|3117|5420|9092|88|1956|445
biological adhesion	Gene Ontology	GO:0022610	8	1428	0.00556605	0.0311896	1307|3119|3117|5420|9092|88|1956|445
response to hormone	Gene Ontology	GO:0009725	6	852	0.00560949	0.0312686	58|445|88|7352|2690|2887
tissue morphogenesis	Gene Ontology	GO:0048729	5	604	0.00588916	0.0326139	64783|7273|1956|58|5420
cellular response to hormone stimulus	Gene Ontology	GO:0032870	5	607	0.00601006	0.0328524	88|7352|2887|445|2690
zinc ion binding	Gene Ontology	GO:0008270	7	1146	0.00601119	0.0328524	11155|84448|378884|8048|27295|6283|57661
protein modification by small protein conjugation	Gene Ontology	GO:0032446	6	870	0.00619025	0.0335535	378884|166348|140458|51465|26259|3304
cell-cell adhesion	Gene Ontology	GO:0098609	6	872	0.00625739	0.033774	3119|3117|5420|9092|1956|445
inorganic cation transmembrane transport	Gene Ontology	GO:0098662	5	617	0.00642574	0.0343919	79026|88|56479|10345|6261
protein domain specific binding	Gene Ontology	GO:0019904	5	626	0.00681681	0.0359573	57661|3304|7846|88|63875
gene expression	Gene Ontology	GO:0010467	18	5182	0.00695592	0.0363903	57661|84448|8048|65083|1956|58|60559|79026|9092|6283|64783|219537|63875|7352|6202|3304|137735|55174
cellular nitrogen compound biosynthetic process	Gene Ontology	GO:0044271	17	4795	0.00724774	0.0372303	57661|84448|2766|1956|53354|8048|63875|445|6283|64783|219537|88|7352|6202|3304|137735|55174
cellular response to oxygen-containing compound	Gene Ontology	GO:1901701	6	909	0.00759777	0.038321	1307|2887|445|88|1956|2690
protein phosphorylation	Gene Ontology	GO:0006468	9	1832	0.00761016	0.038321	7273|84033|6283|219537|88|1956|64798|8844|2690
mRNA metabolic process	Gene Ontology	GO:0016071	5	644	0.00764858	0.0384386	57661|3304|64783|9092|6202
integral component of membrane	Gene Ontology	GO:0016021	18	5233	0.00768665	0.0385291	3119|6261|84889|3105|3106|59084|6443|5420|60559|3117|56479|1956|51465|128486|79188|7352|10345|2690
perinuclear region of cytoplasm	Gene Ontology	GO:0048471	5	645	0.00769677	0.0385291	11155|3304|1956|378884|26259
positive regulation of cell communication	Gene Ontology	GO:0010647	8	1513	0.00777474	0.0385474	2887|8844|6283|1956|3304|137735|10345|2690
positive regulation of signaling	Gene Ontology	GO:0023056	8	1518	0.00792269	0.0391989	2887|8844|6283|1956|3304|137735|10345|2690
carbohydrate derivative metabolic process	Gene Ontology	GO:1901135	7	1213	0.0080903	0.0397202	53354|4621|51465|4626|84618|3304|3339
response to organic cyclic compound	Gene Ontology	GO:0014070	6	928	0.00836163	0.040739	58|6261|445|1956|7352|2690
cellular protein localization	Gene Ontology	GO:0034613	8	1542	0.0086627	0.0417281	8048|84033|88|1956|51465|6202|137735|286
RNA metabolic process	Gene Ontology	GO:0016070	16	4485	0.00877771	0.0420799	57661|84448|65083|8048|79026|8886|9092|6283|64783|219537|88|1956|6202|3304|137735|55174
ion transmembrane transport	Gene Ontology	GO:0034220	6	938	0.0087852	0.0420799	6261|84889|79026|56479|88|10345
cellular macromolecule localization	Gene Ontology	GO:0070727	8	1550	0.0089206	0.0426485	8048|84033|88|1956|51465|6202|137735|286
positive regulation of metabolic process	Gene Ontology	GO:0009893	12	2962	0.0093521	0.0439704	64783|378884|58|8048|8844|445|6283|1956|3304|2690|137735|2887
cation transport	Gene Ontology	GO:0006812	6	953	0.00944923	0.0443347	6261|79026|56479|88|7352|10345
cation transmembrane transport	Gene Ontology	GO:0098655	5	679	0.00946431	0.0443347	79026|88|56479|10345|6261
intrinsic component of membrane	Gene Ontology	GO:0031224	18	5355	0.00969271	0.0452386	3119|6261|84889|3105|3106|59084|6443|5420|60559|3117|56479|1956|51465|128486|79188|7352|10345|2690
cytoplasmic vesicle	Gene Ontology	GO:0031410	7	1258	0.00975865	0.0454632	3119|3117|3105|3106|88|1956|154810
intracellular vesicle	Gene Ontology	GO:0097708	7	1260	0.00983824	0.0455844	3119|3117|3105|3106|88|1956|154810
calcium ion binding	Gene Ontology	GO:0005509	5	689	0.0100334	0.0462405	7273|88|6261|3339|6283
transferase complex	Gene Ontology	GO:1990234	5	693	0.0102675	0.0468627	60559|3304|166348|26259|55174
RNA binding	Gene Ontology	GO:0003723	8	1590	0.0102977	0.0468627	65083|79026|8886|445|64783|9092|6202|399687
nucleic acid metabolic process	Gene Ontology	GO:0090304	17	4975	0.010345	0.0469943	57661|84448|65083|8048|399687|8886|9092|6283|64783|219537|88|1956|6202|79026|3304|137735|55174
single-organism intracellular transport	Gene Ontology	GO:1902582	5	698	0.0105653	0.047825	65083|1956|137735|6202|286
establishment of localization in cell	Gene Ontology	GO:0051649	9	1935	0.0106547	0.0480591	65083|6261|1956|51465|6202|7846|137735|10345|286
inorganic ion transmembrane transport	Gene Ontology	GO:0098660	5	703	0.0108691	0.0489397	79026|88|56479|10345|6261
--------------------

## Sheet: fat
#Term	Database	ID	Input number	Background number	P-Value	Corrected P-Value	Input
cell part	Gene Ontology	GO:0044464	75	15776	6.35093e-22	6.71463e-19	23460|4301|55109|147746|102725035|10537|3119|59084|4240|1787|6387|57190|9855|7018|221935|4277|3304|154810|23541|3384|7078|2887|85329|7052|6285|1203|221477|201176|30061|79026|1659|79188|7757|80024|3482|3929|8224|718|60559|3480|50865|13|55243|3135|22881|28984|6443|7127|29990|7846|55665|9923|23586|11145|4680|51705|948|171024|3117|31|89122|91663|5420|6134|3106|353514|285676|56267|720|3105|4857|282809…
cellular process	Gene Ontology	GO:0009987	73	14647	6.4383e-22	6.71463e-19	4301|55109|147746|102725035|10537|59084|4240|1787|6387|57190|9855|7018|221935|4277|3304|154810|23541|2200|347735|3384|7078|2887|85329|30061|7052|6285|1203|221477|201176|727830|91851|79026|1659|79188|7757|80024|3929|8224|718|60559|3480|3482|55243|3135|4857|28984|6443|7127|29990|7846|55665|9923|13|11145|4680|3119|948|23586|3117|31|89122|91663|5420|6134|285676|56267|720|3105|22881|282809|3106|5799|5…
cell	Gene Ontology	GO:0005623	75	15802	7.12302e-22	6.71463e-19	23460|4301|55109|147746|102725035|10537|3119|59084|4240|1787|6387|57190|9855|7018|221935|4277|3304|154810|23541|3384|7078|2887|85329|7052|6285|1203|221477|201176|30061|79026|1659|79188|7757|80024|3482|3929|8224|718|60559|3480|50865|13|55243|3135|22881|28984|6443|7127|29990|7846|55665|9923|23586|11145|4680|51705|948|171024|3117|31|89122|91663|5420|6134|3106|353514|285676|56267|720|3105|4857|282809…
binding	Gene Ontology	GO:0005488	69	13918	2.72663e-19	1.92773e-16	23460|4301|55109|55266|64430|10537|59084|4240|1787|6387|57190|9855|7018|79026|221935|4277|3304|154810|23541|147746|2200|3384|7078|2887|85329|7052|6285|3106|221477|201176|30061|102725035|1659|79188|7757|80024|3482|3929|8224|718|3480|50865|55243|3135|3105|28984|1203|7127|29990|7846|55665|9923|23586|11145|4680|3119|948|171024|3117|31|89122|5420|6134|285676|56267|720|8933|4857|282809
single-organism process	Gene Ontology	GO:0044699	66	12728	8.04669e-19	4.55121e-16	23460|4301|147746|102725035|10537|59084|4240|6387|57190|9855|7018|221935|4277|3304|154810|23541|2200|347735|3384|7078|2887|85329|30061|7052|6285|1203|221477|201176|727830|91851|79188|55665|80024|3929|8224|718|3480|3482|55243|3135|4857|28984|6443|7127|29990|7846|9923|13|11145|4680|3119|948|23586|3117|31|55109|91663|5420|6134|56267|720|3105|22881|282809|3106|5799
organelle	Gene Ontology	GO:0043226	65	12692	5.36786e-18	2.53005e-15	23460|4301|147746|23586|10537|3929|4240|1787|6387|57190|9855|7018|221935|3304|154810|2200|347735|3384|7078|55243|85329|7052|6285|1203|221477|201176|30061|79026|1659|79188|7757|80024|3482|8224|718|60559|3480|50865|3135|22881|28984|6443|23541|7846|55665|9923|13|11145|3119|948|171024|3117|31|91663|5420|6134|353514|285676|56267|720|3105|4857|282809|3106|5799
single-organism cellular process	Gene Ontology	GO:0044763	62	11494	9.19058e-18	3.71299e-15	4301|147746|102725035|10537|59084|4240|6387|57190|9855|7018|221935|4277|3304|154810|727830|2200|347735|3384|7078|2887|85329|30061|7052|6285|1203|221477|201176|91851|79188|55665|80024|3929|8224|718|3480|3482|55243|3135|4857|28984|6443|7127|29990|7846|13|11145|4680|3119|948|23586|3117|31|55109|91663|5420|6134|56267|3105|22881|282809|3106|5799
membrane	Gene Ontology	GO:0016020	55	8805	1.15948e-17	4.09876e-15	23460|4301|55266|64430|3119|59084|4240|6387|57190|9855|7018|221935|4277|102725035|154810|23541|347735|3384|2887|1203|7052|3105|3106|221477|201176|727830|30061|79026|79188|80024|3929|8224|718|60559|3480|3482|55243|3135|23586|6443|29990|13|11145|51705|948|3117|119395|89122|91663|5420|6134|353514|720|4680|5799
membrane-bounded organelle	Gene Ontology	GO:0043227	61	11806	2.57546e-16	8.09265e-14	23460|4301|147746|55243|10537|3929|4240|1787|6387|57190|7018|221935|3304|154810|2200|347735|3384|7078|85329|7052|6285|3106|221477|201176|30061|79026|1659|79188|7757|80024|3482|8224|718|60559|3480|50865|3135|22881|28984|1203|23541|7846|55665|13|11145|3119|948|171024|3117|31|91663|5420|6134|353514|285676|56267|720|3105|4857|9923|5799
membrane part	Gene Ontology	GO:0044425	46	6452	4.54875e-16	1.24016e-13	23460|55266|102725035|3119|59084|4240|6387|57190|9855|7018|221935|154810|23541|347735|3384|64430|1203|7052|3105|3106|221477|727830|30061|79188|80024|79026|4277|60559|3480|3482|55243|3135|23586|6443|29990|13|11145|51705|948|3117|119395|91663|5420|353514|4680|5799
biological regulation	Gene Ontology	GO:0065007	59	11110	4.82383e-16	1.24016e-13	4301|147746|102725035|10537|3929|4240|6387|57190|9855|7018|221935|4277|3304|154810|23541|2200|347735|3384|7078|2887|85329|30061|7052|6285|3106|221477|201176|91851|7757|80024|79026|8224|718|3480|3482|55243|3135|4857|28984|1203|29990|9923|13|11145|4680|3119|948|23586|3117|31|55109|91663|5420|285676|720|3105|22881|282809|5799
regulation of cellular process	Gene Ontology	GO:0050794	55	9997	4.20344e-15	9.9061e-13	4301|147746|102725035|10537|3929|4240|6387|57190|9855|7018|221935|4277|3304|154810|23541|2200|3384|7078|2887|85329|30061|7052|6285|3106|221477|201176|91851|7757|80024|79026|8224|718|3480|3482|55243|3135|4857|28984|29990|13|11145|4680|3119|948|23586|3117|31|55109|91663|5420|285676|720|3105|22881|9923
regulation of biological process	Gene Ontology	GO:0050789	56	10509	7.24274e-15	1.57557e-12	4301|147746|102725035|10537|3929|4240|6387|57190|9855|7018|221935|4277|3304|154810|23541|2200|3384|7078|2887|85329|30061|7052|6285|3106|221477|201176|91851|7757|80024|79026|8224|718|3480|3482|55243|3135|4857|28984|29990|13|11145|4680|3119|948|23586|3117|31|55109|91663|5420|285676|720|3105|22881|9923|5799
cell periphery	Gene Ontology	GO:0071944	39	4962	1.52291e-14	2.97052e-12	4301|79026|102725035|3119|59084|4240|6387|7018|221935|154810|3384|2887|7052|3105|3106|221477|30061|80024|4277|718|3480|3482|55243|3135|23586|6443|7127|29990|51705|948|3117|119395|89122|91663|5420|353514|720|4680|5799
response to stimulus	Gene Ontology	GO:0050896	49	8081	1.57559e-14	2.97052e-12	4301|147746|102725035|10537|3929|4240|1787|6387|57190|9855|7018|221935|3304|154810|2200|3384|7078|2887|85329|30061|7052|3105|3106|221477|201176|91851|80024|4277|718|3480|3482|3135|23586|28984|29990|13|4680|3119|948|3117|31|89122|91663|353514|720|6285|22881|9923|5799
plasma membrane	Gene Ontology	GO:0005886	38	4859	4.76886e-14	8.42896e-12	4301|79026|102725035|3119|59084|4240|6387|7018|221935|154810|3384|2887|7052|3105|3106|221477|30061|80024|4277|718|3480|3482|55243|3135|23586|6443|29990|51705|948|3117|119395|89122|91663|5420|353514|720|4680|5799
vesicle	Gene Ontology	GO:0031982	33	3652	9.48598e-14	1.57802e-11	55243|3929|4240|6387|7018|221935|154810|2200|347735|3384|7078|7052|3105|3106|30061|3482|8224|718|50865|3135|1203|23541|7846|948|3119|3117|31|91663|5420|353514|720|79026|5799
cytoplasm	Gene Ontology	GO:0005737	54	10469	1.82717e-13	2.87069e-11	4301|55109|147746|55243|10537|1203|1787|57190|9855|7018|3304|154810|7078|2887|85329|7052|6285|3106|221477|201176|30061|79026|1659|79188|55665|80024|3482|8224|60559|50865|3135|23586|28984|6443|7127|23541|7846|13|11145|3119|948|171024|3117|31|89122|91663|5420|6134|56267|3105|22881|282809|5799|57604
membrane-bounded vesicle	Gene Ontology	GO:0031988	32	3520	2.24891e-13	3.34733e-11	55243|3929|4240|6387|7018|221935|2200|347735|3384|7078|7052|3105|3106|30061|3482|8224|718|50865|3135|1203|23541|7846|948|3119|3117|31|91663|5420|353514|720|79026|5799
protein binding	Gene Ontology	GO:0005515	54	10621	3.43086e-13	4.85124e-11	4301|55266|64430|10537|3929|4240|6387|57190|9855|7018|221935|3304|154810|147746|2200|3384|7078|2887|7052|6285|3106|221477|201176|30061|102725035|1659|79188|80024|79026|4277|718|3480|3482|55243|3135|3105|28984|1203|7127|29990|7846|23586|11145|4680|948|171024|31|55109|5420|6134|56267|720|8933|282809
innate immune response	Gene Ontology	GO:0045087	17	798	9.42848e-13	1.22233e-10	718|3384|89122|4277|3119|948|23586|3117|3105|3106|3929|3135|353514|720|6285|3304|10537
intracellular part	Gene Ontology	GO:0044424	60	13428	9.50895e-13	1.22233e-10	23460|4301|55109|147746|23586|10537|1203|1787|57190|9855|7018|3304|154810|7078|2887|85329|7052|6285|3106|221477|201176|30061|79026|1659|79188|7757|80024|3482|8224|60559|3480|50865|55243|3135|4857|28984|6443|7127|23541|7846|55665|9923|13|11145|3119|948|171024|3117|31|89122|91663|5420|6134|285676|56267|3105|22881|282809|5799|57604
intrinsic component of membrane	Gene Ontology	GO:0031224	38	5355	1.01517e-12	1.24822e-10	23460|55266|102725035|59084|1203|221935|23541|347735|3384|64430|7052|3105|3106|221477|727830|30061|79188|80024|4277|60559|3480|3482|55243|3135|6443|29990|51705|13|11145|3119|948|3117|119395|91663|5420|353514|4680|5799
cell communication	Gene Ontology	GO:0007154	40	6000	1.31374e-12	1.54802e-10	4301|147746|102725035|10537|59084|6387|57190|9855|4277|3304|154810|2200|3384|7078|2887|85329|7052|3105|3106|201176|91851|80024|3929|8224|718|3480|3482|3135|23586|28984|4857|29990|4680|3119|948|3117|91663|6285|22881|5799
immune response	Gene Ontology	GO:0006955	21	1474	2.65503e-12	2.9452e-10	718|3384|89122|4277|102725035|948|23586|3117|3480|3106|3929|28984|3105|3135|353514|6387|3119|720|6285|3304|10537
integral component of membrane	Gene Ontology	GO:0016021	37	5233	2.70775e-12	2.9452e-10	23460|55266|102725035|59084|1203|221935|23541|347735|3384|64430|3105|3106|221477|727830|30061|79188|80024|4277|60559|3480|3482|55243|3135|6443|29990|51705|13|11145|3119|948|3117|119395|91663|5420|353514|4680|5799
intracellular	Gene Ontology	GO:0005622	60	13775	3.25827e-12	3.39245e-10	23460|4301|55109|147746|23586|10537|1203|1787|57190|9855|7018|3304|154810|7078|2887|85329|7052|6285|3106|221477|201176|30061|79026|1659|79188|7757|80024|3482|8224|60559|3480|50865|55243|3135|4857|28984|6443|7127|23541|7846|55665|9923|13|11145|3119|948|171024|3117|31|89122|91663|5420|6134|285676|56267|3105|22881|282809|5799|57604
extracellular region	Gene Ontology	GO:0005576	34	4424	3.35886e-12	3.39245e-10	79026|55243|59084|4240|6387|7018|221935|3304|2200|347735|3384|7078|4680|7052|6285|3106|91851|3482|3929|718|50865|1203|7127|23541|7846|51705|948|31|55109|91663|5420|353514|720|3105
positive regulation of biological process	Gene Ontology	GO:0048518	36	5067	5.52531e-12	5.38813e-10	55243|10537|3929|4240|6387|57190|7018|3304|154810|29990|3384|7078|2887|7052|3105|221477|30061|4277|718|3480|3482|3135|23586|28984|23541|13|948|3119|3117|31|55109|91663|5420|720|6285|22881
single organism signaling	Gene Ontology	GO:0044700	39	5972	5.83596e-12	5.49428e-10	4301|147746|102725035|10537|3929|6387|57190|9855|4277|3304|154810|2200|3384|7078|2887|85329|7052|3105|3106|201176|91851|80024|8224|718|3480|3482|3135|23586|28984|4857|29990|4680|3119|948|3117|91663|6285|22881|5799
signaling	Gene Ontology	GO:0023052	39	5978	6.02273e-12	5.49428e-10	4301|147746|102725035|10537|3929|6387|57190|9855|4277|3304|154810|2200|3384|7078|2887|85329|7052|3105|3106|201176|91851|80024|8224|718|3480|3482|3135|23586|28984|4857|29990|4680|3119|948|3117|91663|6285|22881|5799
cellular response to stimulus	Gene Ontology	GO:0051716	41	6741	1.15557e-11	1.02123e-09	4301|147746|102725035|10537|3929|6387|57190|9855|7018|3304|154810|2200|3384|7078|2887|85329|30061|7052|3105|3106|201176|91851|4277|718|3480|3482|3135|23586|28984|29990|13|4680|3119|948|3117|31|91663|6285|22881|9923|5799
immune system process	Gene Ontology	GO:0002376	25	2414	1.39928e-11	1.19914e-09	102725035|10537|3929|6387|9855|3304|3384|4680|3105|3106|30061|4277|718|3480|3135|23586|28984|3119|948|3117|89122|5420|353514|720|6285
plasma membrane part	Gene Ontology	GO:0044459	25	2516	3.36739e-11	2.80088e-09	102725035|3119|4240|6387|7018|154810|3384|55243|7052|3105|3106|30061|3480|3482|3135|23586|6443|29990|948|4680|3117|119395|5420|79026|5799
extracellular region part	Gene Ontology	GO:0044421	30	3743	3.94412e-11	3.18685e-09	79026|55243|3929|4240|6387|7018|221935|3304|2200|347735|3384|7078|7052|6285|3106|3482|718|50865|1203|7127|23541|7846|4680|948|31|91663|5420|353514|720|3105
positive regulation of cellular process	Gene Ontology	GO:0048522	33	4559	4.09609e-11	3.21771e-09	55243|10537|3929|4240|6387|57190|7018|3304|154810|29990|7078|2887|7052|6285|221477|30061|718|3480|3482|3135|23586|28984|23541|13|948|3119|3117|31|55109|91663|5420|720|22881
intracellular organelle	Gene Ontology	GO:0043229	53	11680	8.87837e-11	6.78596e-09	23460|4301|147746|23586|10537|1203|1787|57190|9855|7018|3304|154810|7078|85329|7052|6285|3106|221477|201176|30061|1659|79188|7757|80024|79026|8224|60559|3480|3482|3135|4857|28984|6443|23541|7846|55665|9923|13|11145|3119|948|171024|3117|31|91663|5420|6134|285676|56267|3105|22881|282809|5799
extracellular exosome	Gene Ontology	GO:0070062	25	2738	1.98412e-10	1.4766e-08	55243|3929|4240|6387|7018|221935|2200|347735|3384|7078|7052|3105|3106|50865|718|3482|1203|23541|7846|31|91663|5420|353514|720|79026
extracellular vesicle	Gene Ontology	GO:1903561	25	2751	2.18948e-10	1.5597e-08	55243|3929|4240|6387|7018|221935|2200|347735|3384|7078|7052|3105|3106|50865|718|3482|1203|23541|7846|31|91663|5420|353514|720|79026
extracellular organelle	Gene Ontology	GO:0043230	25	2752	2.20608e-10	1.5597e-08	55243|3929|4240|6387|7018|221935|2200|347735|3384|7078|7052|3105|3106|50865|718|3482|1203|23541|7846|31|91663|5420|353514|720|79026
single-multicellular organism process	Gene Ontology	GO:0044707	36	5822	2.98456e-10	2.05862e-08	4301|102725035|10537|3929|4240|6387|57190|9855|7018|221935|3304|154810|2200|7078|1203|30061|7052|6285|3106|91851|282809|718|3482|3135|23586|28984|4857|7127|948|31|55109|91663|5420|22881|9923|6443
response to organic substance	Gene Ontology	GO:0010033	25	2810	3.39982e-10	2.26342e-08	10537|3929|1787|6387|57190|221935|3304|2200|7078|2887|3105|3106|91851|4277|718|3480|3482|3135|23586|3119|948|3117|31|6285|5799
signal transduction	Gene Ontology	GO:0007165	35	5542	3.44155e-10	2.26342e-08	4301|147746|102725035|10537|3929|6387|57190|9855|3304|154810|2200|3384|7078|2887|85329|7052|3105|3106|201176|91851|4277|718|3480|3482|3135|23586|28984|29990|4680|3119|948|3117|91663|6285|22881
localization	Gene Ontology	GO:0051179	35	5581	4.17059e-10	2.68055e-08	23460|3929|4240|6387|57190|7018|3304|154810|2200|347735|7078|2887|7052|79026|201176|30061|80024|8224|718|3480|3482|23586|28984|7127|23541|7846|4680|948|31|91663|5420|6134|720|119395|5799
response to chemical	Gene Ontology	GO:0042221	29	4014	1.08113e-09	6.64658e-08	10537|3929|1787|6387|57190|7018|221935|3304|2200|7078|2887|30061|3105|3106|91851|4277|718|3480|3482|3135|23586|28984|13|3119|948|3117|31|6285|5799
multicellular organismal process	Gene Ontology	GO:0032501	38	6781	1.24239e-09	7.47548e-08	4301|102725035|10537|3929|4240|6387|57190|9855|7018|221935|3304|154810|727830|2200|7078|55243|1203|30061|7052|6285|3106|91851|282809|718|3482|3135|23586|28984|4857|7127|948|31|55109|91663|5420|22881|9923|6443
regulation of response to stimulus	Gene Ontology	GO:0048583	27	3560	1.78211e-09	1.03546e-07	147746|10537|3929|6387|57190|9855|3304|2200|3384|7078|2887|3105|3106|91851|4277|718|3480|3135|23586|28984|3119|948|3117|91663|720|6285|22881
cytoplasmic part	Gene Ontology	GO:0044444	41	7901	1.79411e-09	1.03546e-07	4301|79026|55243|1203|57190|9855|7018|3304|154810|7078|2887|85329|7052|6285|3106|221477|30061|79188|80024|8224|60559|3482|3135|23586|28984|7127|7846|13|11145|3119|948|171024|3117|31|55109|91663|6134|56267|3105|282809|5799
regulation of immune response	Gene Ontology	GO:0050776	14	824	2.05851e-09	1.14146e-07	3384|4277|3119|948|718|3117|3105|3106|3929|3135|23586|28984|720|3304
transport	Gene Ontology	GO:0006810	30	4456	2.62581e-09	1.40315e-07	23460|3929|4240|6387|57190|7018|3304|347735|7078|2887|7052|79026|201176|30061|80024|8224|718|3482|23586|28984|7127|23541|7846|948|31|91663|6134|720|119395|5799
defense response	Gene Ontology	GO:0006952	18	1535	2.62967e-09	1.40315e-07	718|3384|89122|4277|948|102725035|23586|3117|3105|3106|3929|3135|353514|3119|720|6285|3304|10537
intracellular membrane-bounded organelle	Gene Ontology	GO:0043231	48	10674	2.95947e-09	1.54989e-07	23460|4301|147746|10537|1203|1787|57190|7018|3304|154810|7078|85329|7052|6285|3106|221477|201176|30061|1659|79188|7757|80024|79026|8224|60559|3480|3482|3135|4857|28984|23541|7846|55665|13|11145|3119|948|171024|3117|31|5420|6134|285676|56267|3105|22881|9923|5799
positive regulation of immune system process	Gene Ontology	GO:0002684	14	879	4.61128e-09	2.37103e-07	3384|4277|3119|948|718|3117|3105|3929|28984|3135|23586|6387|720|3304
MHC protein complex	Gene Ontology	GO:0042611	5	25	4.74845e-09	2.39797e-07	3117|3105|3106|3135|3119
establishment of localization	Gene Ontology	GO:0051234	30	4583	5.06996e-09	2.51541e-07	23460|3929|4240|6387|57190|7018|3304|347735|7078|2887|7052|79026|201176|30061|80024|8224|718|3482|23586|28984|7127|23541|7846|948|31|91663|6134|720|119395|5799
peptide antigen binding	Gene Ontology	GO:0042605	5	26	5.65238e-09	2.70931e-07	3117|3105|3106|3135|3119
cell adhesion	Gene Ontology	GO:0007155	17	1421	5.83163e-09	2.74864e-07	4301|4277|3119|948|3384|7052|55109|91663|28984|4240|5420|3135|3117|6387|9855|221935|55243
biological adhesion	Gene Ontology	GO:0022610	17	1428	6.26548e-09	2.90472e-07	4301|4277|3119|948|3384|7052|55109|91663|28984|4240|5420|3135|3117|6387|9855|221935|55243
activation of immune response	Gene Ontology	GO:0002253	11	480	6.47086e-09	2.93847e-07	3384|4277|948|3119|718|3117|3929|23586|28984|720|3304
positive regulation of immune response	Gene Ontology	GO:0050778	12	609	6.54609e-09	2.93847e-07	3384|4277|3119|948|718|3117|3105|3929|23586|28984|720|3304
single-organism developmental process	Gene Ontology	GO:0044767	33	5604	8.58101e-09	3.79173e-07	4301|102725035|10537|3929|1203|6387|57190|9855|221935|727830|2200|7078|85329|30061|7052|6285|3106|91851|282809|718|3482|3135|4857|28984|4240|7127|948|55109|91663|5420|22881|9923|6443
lumenal side of endoplasmic reticulum membrane	Gene Ontology	GO:0098553	5	29	9.21146e-09	3.94697e-07	3117|3105|3106|3135|3119
integral component of lumenal side of endoplasmic reticulum membrane	Gene Ontology	GO:0071556	5	29	9.21146e-09	3.94697e-07	3117|3105|3106|3135|3119
cell surface receptor signaling pathway	Gene Ontology	GO:0007166	22	2583	1.12961e-08	4.76797e-07	102725035|3929|6387|9855|3304|154810|2200|3384|7078|2887|3105|3106|91851|4277|3480|3482|3135|29990|3119|948|3117|22881
cellular response to chemical stimulus	Gene Ontology	GO:0070887	22	2587	1.16133e-08	4.7982e-07	3929|6387|57190|7018|3304|2200|7078|2887|30061|3105|3106|91851|3480|3135|28984|13|3119|948|3117|31|6285|5799
positive regulation of response to stimulus	Gene Ontology	GO:0048584	19	1903	1.17071e-08	4.7982e-07	3119|3384|7078|2887|948|718|3117|6285|3929|28984|23586|6387|57190|720|3105|22881|4277|3304|10537
developmental process	Gene Ontology	GO:0032502	33	5693	1.27216e-08	5.13951e-07	4301|102725035|10537|3929|1203|6387|57190|9855|221935|727830|2200|7078|85329|30061|7052|6285|3106|91851|282809|718|3482|3135|4857|28984|4240|7127|948|55109|91663|5420|22881|9923|6443
system development	Gene Ontology	GO:0048731	28	4206	1.421e-08	5.65997e-07	4301|102725035|10537|3929|1203|6387|57190|9855|221935|2200|7078|30061|7052|6285|3106|91851|718|3482|3135|4857|28984|4240|7127|55109|5420|22881|9923|6443
response to stress	Gene Ontology	GO:0006950	26	3660	1.52568e-08	5.99253e-07	102725035|10537|3929|6387|57190|3304|3384|7078|3105|3106|221477|4277|718|3480|3135|23586|28984|948|3119|3117|89122|353514|720|6285|22881|9923
apoptotic cell clearance	Gene Ontology	GO:0043277	5	35	2.15707e-08	8.35642e-07	7052|720|948|4240|718
regulation of immune system process	Gene Ontology	GO:0002682	16	1372	2.47731e-08	9.34111e-07	3384|4277|102725035|948|718|3117|3105|3106|3929|28984|3135|23586|6387|3119|720|3304
antigen binding	Gene Ontology	GO:0003823	6	80	2.79835e-08	1.04128e-06	4277|3119|3117|3105|3106|3135
anatomical structure development	Gene Ontology	GO:0048856	31	5313	3.80737e-08	1.38042e-06	4301|102725035|10537|3929|1203|6387|57190|9855|221935|2200|7078|30061|7052|6285|3106|91851|282809|718|3482|3135|4857|28984|4240|7127|948|55109|91663|5420|22881|9923|6443
transport vesicle	Gene Ontology	GO:0030133	9	339	4.96995e-08	1.7574e-06	8224|3119|3117|3105|3106|3482|3135|30061|5799
multicellular organism development	Gene Ontology	GO:0007275	29	4770	5.27463e-08	1.84156e-06	4301|102725035|10537|3929|1203|6387|57190|9855|221935|2200|7078|30061|7052|6285|3106|91851|718|3482|3135|4857|28984|4240|7127|55109|91663|5420|22881|9923|6443
transport vesicle membrane	Gene Ontology	GO:0030658	7	156	5.38846e-08	1.85836e-06	8224|3119|3117|3105|3106|3135|5799
animal organ development	Gene Ontology	GO:0048513	23	3087	5.66008e-08	1.92852e-06	4301|102725035|10537|3929|1203|6387|57190|9855|221935|2200|30061|7052|6285|3106|91851|3482|3135|4857|28984|6443|5420|22881|9923
endocytic vesicle	Gene Ontology	GO:0030139	8	254	8.09502e-08	2.72532e-06	948|3119|3117|3105|3106|3482|3135|7018
positive regulation of phagocytosis	Gene Ontology	GO:0050766	5	47	8.3547e-08	2.77966e-06	720|3929|948|4240|718
single-organism transport	Gene Ontology	GO:0044765	21	2654	9.16161e-08	3.01268e-06	23460|3929|8224|2887|948|718|7052|91663|31|7078|720|28984|4240|23586|6387|57190|6134|7018|7127|5799|80024
cellular component organization	Gene Ontology	GO:0016043	32	5863	9.99335e-08	3.24841e-06	4301|147746|55243|10537|3929|4240|6387|57190|9855|7018|221935|3304|2200|3384|6285|221477|79188|282809|718|3480|28984|1203|29990|948|31|89122|91663|5420|6134|720|79026|6443
primary metabolic process	Gene Ontology	GO:0044238	43	9824	1.07512e-07	3.45504e-06	55109|147746|55243|10537|3929|4240|1787|3304|29990|2200|347735|7078|2887|85329|30061|7052|79026|1203|221477|91851|1659|7757|718|60559|3480|23586|28984|4857|23541|13|11145|948|31|89122|91663|6134|285676|56267|720|22881|9923|5799|57604
extracellular space	Gene Ontology	GO:0005615	15	1330	1.10186e-07	3.50118e-06	2200|3482|7078|4680|948|718|6285|3929|5420|4240|6387|720|7018|7127|3304
metabolic process	Gene Ontology	GO:0008152	45	10642	1.16845e-07	3.67151e-06	55109|147746|55243|10537|59084|4240|1787|57190|3304|29990|2200|347735|7078|2887|85329|30061|7052|79026|221477|91851|1659|7757|3929|718|60559|3480|4857|28984|1203|23541|13|11145|948|23586|31|89122|91663|6134|285676|56267|720|22881|9923|5799|57604
cell junction	Gene Ontology	GO:0030054	14	1150	1.23643e-07	3.84244e-06	4301|8224|55243|171024|7052|79026|3482|91663|5420|23586|221935|3304|154810|5799
whole membrane	Gene Ontology	GO:0098805	15	1344	1.25886e-07	3.86963e-06	8224|948|3119|3117|3105|3106|3482|91663|5420|1203|55243|3135|7018|79026|5799
cellular component organization or biogenesis	Gene Ontology	GO:0071840	32	6012	1.7971e-07	5.3497e-06	4301|147746|55243|10537|3929|4240|6387|57190|9855|7018|221935|3304|2200|3384|6285|221477|79188|282809|718|3480|28984|1203|29990|948|31|89122|91663|5420|6134|720|79026|6443
ER to Golgi transport vesicle membrane	Gene Ontology	GO:0012507	5	56	1.88457e-07	5.55162e-06	3117|3105|3106|3135|3119
positive regulation of endocytosis	Gene Ontology	GO:0045807	6	116	2.26662e-07	6.60825e-06	7018|948|718|3929|4240|720
intrinsic component of plasma membrane	Gene Ontology	GO:0031226	16	1619	2.3082e-07	6.6608e-06	3384|4680|948|102725035|30061|7052|3480|119395|3482|5420|3117|6443|3105|29990|3106|5799
side of membrane	Gene Ontology	GO:0098552	9	412	2.48564e-07	7.1004e-06	948|3119|3117|3105|3106|4240|3135|6387|7018
single-organism localization	Gene Ontology	GO:1902578	21	2861	3.18184e-07	8.90914e-06	23460|3929|8224|2887|948|718|7052|91663|31|7078|720|28984|4240|23586|6387|57190|6134|7018|7127|5799|80024
receptor binding	Gene Ontology	GO:0005102	15	1458	3.51711e-07	9.75135e-06	2200|3384|4277|2887|718|3480|3106|3929|4240|3135|6387|7018|6285|3304|29990
cellular metabolic process	Gene Ontology	GO:0044237	42	9846	3.72885e-07	1.0238e-05	55109|147746|55243|10537|3929|4240|1787|3304|29990|2200|347735|7078|2887|1203|30061|7052|79026|221477|91851|1659|7757|718|60559|3480|23586|28984|4857|23541|13|11145|948|31|89122|91663|6134|285676|56267|720|22881|9923|5799|57604
organic substance metabolic process	Gene Ontology	GO:0071704	43	10277	4.14752e-07	1.12781e-05	55109|147746|55243|10537|3929|4240|1787|3304|29990|2200|347735|7078|2887|85329|30061|7052|79026|1203|221477|91851|1659|7757|718|60559|3480|23586|28984|4857|23541|13|11145|948|31|89122|91663|6134|285676|56267|720|22881|9923|5799|57604
regulation of phagocytosis	Gene Ontology	GO:0050764	5	68	4.66595e-07	1.2567e-05	720|3929|948|4240|718
antigen processing and presentation	Gene Ontology	GO:0019882	7	223	5.57646e-07	1.48776e-05	4277|948|3119|3117|3105|3106|3135
immune response-regulating signaling pathway	Gene Ontology	GO:0002764	9	456	5.69502e-07	1.49545e-05	3384|4277|948|3119|3117|3929|3135|23586|3304
ER to Golgi transport vesicle	Gene Ontology	GO:0030134	5	71	5.71107e-07	1.49545e-05	3117|3105|3106|3135|3119
cytoplasmic vesicle part	Gene Ontology	GO:0044433	10	604	6.22588e-07	1.6153e-05	7078|948|3119|3117|3105|3106|3135|7018|8224|5799
integral component of plasma membrane	Gene Ontology	GO:0005887	15	1562	8.28923e-07	2.11189e-05	3384|4680|948|102725035|3117|3480|119395|3482|5420|30061|6443|3105|29990|3106|5799
negative regulation of biological process	Gene Ontology	GO:0048519	26	4494	8.82688e-07	2.22879e-05	102725035|3929|6387|57190|3304|2200|7078|2887|30061|6285|3106|91851|4277|718|3480|55243|3135|23586|28984|11145|948|91663|5420|720|22881|5799
peptide binding	Gene Ontology	GO:0042277	7	240	8.98675e-07	2.24907e-05	3119|3117|3480|3106|3135|30061|3105
endocytic vesicle membrane	Gene Ontology	GO:0030666	6	153	1.0759e-06	2.66899e-05	948|3119|3117|3105|3106|3135
interferon-gamma-mediated signaling pathway	Gene Ontology	GO:0060333	5	85	1.32794e-06	3.24425e-05	3117|3105|3106|3135|3119
macromolecule metabolic process	Gene Ontology	GO:0043170	38	8738	1.33074e-06	3.24425e-05	55109|147746|55243|10537|3929|4240|1787|3304|29990|2200|7078|2887|1203|30061|7052|79026|221477|91851|1659|7757|718|60559|3480|23586|28984|4857|23541|948|31|89122|91663|6134|285676|720|22881|9923|5799|57604
response to interferon-gamma	Gene Ontology	GO:0034341	6	160	1.38285e-06	3.34248e-05	3119|10537|3117|3105|3106|3135
antigen processing and presentation of exogenous peptide antigen	Gene Ontology	GO:0002478	6	161	1.43202e-06	3.37478e-05	948|3119|3117|3105|3106|3135
positive regulation of cell adhesion	Gene Ontology	GO:0045785	8	377	1.48278e-06	3.46554e-05	948|3119|7052|91663|5420|3135|3117|6387
amide binding	Gene Ontology	GO:0033218	7	260	1.50877e-06	3.49739e-05	3119|3117|3480|3106|3135|30061|3105
antigen processing and presentation of exogenous antigen	Gene Ontology	GO:0019884	6	168	1.81769e-06	4.1792e-05	948|3119|3117|3105|3106|3135
cellular macromolecule metabolic process	Gene Ontology	GO:0044260	36	8101	1.85796e-06	4.23734e-05	55109|147746|55243|10537|4240|1787|3304|29990|2200|7078|2887|1203|30061|7052|79026|221477|91851|1659|7757|718|60559|3480|23586|28984|4857|23541|948|89122|91663|6134|285676|720|22881|9923|5799|57604
cellular response to organic substance	Gene Ontology	GO:0071310	17	2149	1.96059e-06	4.40044e-05	2200|7078|2887|948|3117|3480|31|3929|3119|3135|91851|6387|57190|3105|3304|3106|5799
regulation of localization	Gene Ontology	GO:0032879	18	2405	2.0218e-06	4.50208e-05	2887|948|718|3480|3929|91663|28984|4240|5420|23586|6387|57190|720|7018|79026|3304|154810|80024
single organismal cell-cell adhesion	Gene Ontology	GO:0016337	10	696	2.17669e-06	4.80912e-05	3384|4277|55243|3119|3117|91663|5420|3135|6387|28984
cytoplasmic vesicle	Gene Ontology	GO:0031410	13	1258	2.22083e-06	4.86862e-05	7078|948|3119|3117|3105|3106|3482|3135|30061|7018|8224|154810|5799
cell-cell adhesion	Gene Ontology	GO:0098609	11	872	2.24989e-06	4.87753e-05	3384|4277|55243|3119|3117|91663|28984|5420|3135|6387|221935
intracellular vesicle	Gene Ontology	GO:0097708	13	1260	2.25939e-06	4.87753e-05	7078|948|3119|3117|3105|3106|3482|3135|30061|7018|8224|154810|5799
antigen processing and presentation of peptide antigen	Gene Ontology	GO:0048002	6	180	2.67391e-06	5.72865e-05	948|3119|3117|3105|3106|3135
regulation of immune effector process	Gene Ontology	GO:0002697	8	420	3.24245e-06	6.84302e-05	4277|948|718|3105|3106|3929|23586|720
immune response-activating signal transduction	Gene Ontology	GO:0002757	8	424	3.47176e-06	7.27269e-05	3384|4277|948|3119|3117|3929|23586|3304
response to endogenous stimulus	Gene Ontology	GO:0009719	14	1544	3.89769e-06	8.10491e-05	2200|7078|2887|948|718|3480|31|10537|1787|91851|6387|57190|6285|221935
single organism cell adhesion	Gene Ontology	GO:0098602	10	745	3.93872e-06	8.13043e-05	3384|4277|55243|3119|3117|91663|5420|3135|6387|28984
regulation of response to stress	Gene Ontology	GO:0080134	13	1337	4.28051e-06	8.7151e-05	3384|4277|948|718|3480|3106|3929|23586|6387|57190|720|22881|3304
vacuolar membrane	Gene Ontology	GO:0005774	9	586	4.28359e-06	8.7151e-05	3119|3117|3105|3106|3482|1203|3135|7018|79026
endocytosis	Gene Ontology	GO:0006897	9	595	4.83421e-06	9.71494e-05	3929|720|948|718|7052|3482|201176|4240|7018
immune effector process	Gene Ontology	GO:0002252	10	763	4.84373e-06	9.71494e-05	4277|948|3119|718|3105|3106|3929|23586|28984|720
regulation of endocytosis	Gene Ontology	GO:0030100	6	201	4.948e-06	9.85418e-05	7018|948|718|3929|4240|720
regulation of multicellular organismal process	Gene Ontology	GO:0051239	18	2581	5.39299e-06	0.000106653	718|4301|55109|102725035|948|23586|6285|3106|3929|91663|28984|3135|22881|6387|57190|221935|3304|154810
phagocytosis	Gene Ontology	GO:0006909	6	205	5.52125e-06	0.000108431	948|718|7052|3929|4240|720
cytoplasmic, membrane-bounded vesicle	Gene Ontology	GO:0016023	12	1159	5.56939e-06	0.000108622	7078|948|3119|3117|3105|3106|3482|3135|30061|7018|8224|5799
endoplasmic reticulum	Gene Ontology	GO:0005783	14	1623	6.85376e-06	0.000132756	13|11145|3117|3119|7052|3105|3106|6134|3135|60559|57190|1203|79188|5799
lymphocyte mediated immunity	Gene Ontology	GO:0002449	6	214	7.00974e-06	0.000134854	4277|3119|718|3105|3106|720
regulation of cell adhesion	Gene Ontology	GO:0030155	9	629	7.49895e-06	0.000143032	948|3119|7052|91663|28984|5420|3135|3117|6387
endomembrane system	Gene Ontology	GO:0012505	22	3788	7.53599e-06	0.000143032	1203|57190|7018|7078|7052|3105|3106|221477|30061|79188|8224|60559|3482|3135|7846|13|11145|948|3119|3117|6134|5799
cytoplasmic vesicle membrane	Gene Ontology	GO:0030659	8	478	8.19695e-06	0.00015454	8224|948|3119|3117|3105|3106|3135|5799
cell differentiation	Gene Ontology	GO:0030154	21	3519	8.51761e-06	0.000158472	9855|4301|102725035|948|10537|6285|3106|55109|91663|28984|1203|5420|3135|91851|6387|57190|6443|221935|7127|727830|85329
regulation of cell communication	Gene Ontology	GO:0010646	19	2955	8.96339e-06	0.000165676	2200|8224|2887|948|718|3480|3929|91663|91851|6387|57190|9855|6285|22881|7078|3304|80024|10537|147746
cellular developmental process	Gene Ontology	GO:0048869	22	3837	9.2422e-06	0.00016972	4301|102725035|10537|1203|6387|57190|9855|221935|727830|85329|6285|3106|91851|282809|3135|28984|6443|7127|948|55109|91663|5420
integral component of endoplasmic reticulum membrane	Gene Ontology	GO:0030176	5	130	9.73552e-06	0.000177626	3117|3105|3106|3135|3119
negative regulation of cell-cell adhesion	Gene Ontology	GO:0022408	5	131	1.00907e-05	0.000182926	3135|6387|91663|28984|5420
vesicle membrane	Gene Ontology	GO:0012506	8	497	1.08149e-05	0.000194807	8224|948|3119|3117|3105|3106|3135|5799
coated vesicle	Gene Ontology	GO:0030135	6	232	1.09643e-05	0.000196248	3119|3117|3105|3106|3482|3135
regulation of signaling	Gene Ontology	GO:0023051	19	3006	1.14119e-05	0.000201495	2200|8224|2887|948|718|3480|3929|91663|91851|6387|57190|9855|6285|22881|7078|3304|80024|10537|147746
plasma membrane protein complex	Gene Ontology	GO:0098797	8	502	1.16107e-05	0.000201495	3119|3117|3480|3106|3135|6443|7018|3105
intrinsic component of endoplasmic reticulum membrane	Gene Ontology	GO:0031227	5	135	1.16137e-05	0.000201495	3117|3105|3106|3135|3119
response to oxygen-containing compound	Gene Ontology	GO:1901700	13	1474	1.20362e-05	0.00020755	2200|3482|7078|2887|948|718|3480|31|3929|6387|221935|4277|5799
cellular response to interferon-gamma	Gene Ontology	GO:0071346	5	138	1.28693e-05	0.00021959	3117|3105|3106|3135|3119
cellular chemical homeostasis	Gene Ontology	GO:0055082	9	674	1.28897e-05	0.00021959	948|7052|1203|30061|6387|57190|7018|5799|80024
regulation of cellular component organization	Gene Ontology	GO:0051128	16	2218	1.30291e-05	0.000220636	3929|55243|948|718|6285|221477|91663|28984|4240|5420|6387|9855|7018|221935|720|3304
coated vesicle membrane	Gene Ontology	GO:0030662	5	140	1.37636e-05	0.000230316	3117|3105|3106|3135|3119
anatomical structure morphogenesis	Gene Ontology	GO:0009653	17	2513	1.53116e-05	0.000254713	2200|4301|948|718|7052|6285|55109|91663|28984|4240|5420|22881|6387|221935|7127|30061|282809
vacuolar part	Gene Ontology	GO:0044437	9	690	1.54746e-05	0.000255919	3119|3117|3105|3106|3482|1203|3135|7018|79026
regulation of cell-cell adhesion	Gene Ontology	GO:0022407	7	375	1.56541e-05	0.000257383	3119|3117|91663|28984|5420|3135|6387
cellular cation homeostasis	Gene Ontology	GO:0030003	8	529	1.68137e-05	0.00027485	948|7052|1203|30061|6387|57190|7018|80024
regulation of biological quality	Gene Ontology	GO:0065008	20	3386	1.71297e-05	0.000278407	2200|4301|8224|55243|948|718|7052|6285|31|3929|91663|1203|30061|6387|57190|7018|3304|282809|5799|80024
cell-cell junction	Gene Ontology	GO:0005911	7	382	1.75873e-05	0.000284211	4301|55243|79026|91663|5420|23586|154810
positive regulation of cytokine production	Gene Ontology	GO:0001819	7	383	1.78789e-05	0.000287282	948|718|3929|3135|23586|28984|3304
regulation of transport	Gene Ontology	GO:0051049	14	1774	1.84341e-05	0.000294529	2887|948|718|79026|3929|28984|4240|23586|6387|57190|720|7018|3304|80024
organelle part	Gene Ontology	GO:0044422	34	8165	1.88373e-05	0.000299281	4301|10537|1203|1787|57190|7018|3304|154810|7078|3105|3106|221477|201176|1659|79188|282809|8224|60559|3482|3135|28984|7846|13|948|3119|171024|3117|31|91663|6134|79026|4857|80024|5799
cellular ion homeostasis	Gene Ontology	GO:0006873	8	542	1.9946e-05	0.000315125	948|7052|1203|30061|6387|57190|7018|80024
homeostatic process	Gene Ontology	GO:0042592	13	1549	2.0189e-05	0.000317192	4301|948|7052|31|1203|30061|6387|57190|7018|3304|282809|5799|80024
response to nitrogen compound	Gene Ontology	GO:1901698	10	904	2.06089e-05	0.00032023	2200|7078|2887|10537|3480|1787|23586|6387|57190|221935
cell surface	Gene Ontology	GO:0009986	9	726	2.295e-05	0.000354659	3929|4277|948|3105|3106|3482|4240|6387|7018
intracellular signal transduction	Gene Ontology	GO:0035556	17	2598	2.34017e-05	0.000359674	7078|147746|948|718|3480|10537|91663|28984|23586|6387|57190|9855|6285|22881|3304|154810|85329
anatomical structure formation involved in morphogenesis	Gene Ontology	GO:0048646	11	1129	2.46476e-05	0.000376775	948|718|7052|55109|5420|4240|30061|28984|221935|7127|282809
regulation of cytokine production	Gene Ontology	GO:0001817	8	560	2.50817e-05	0.00038135	948|718|3106|3929|3135|23586|28984|3304
negative regulation of response to stimulus	Gene Ontology	GO:0048585	12	1355	2.59191e-05	0.000391974	2200|7078|2887|3480|3106|91663|3135|91851|6387|22881|4277|3304
positive regulation of cellular component organization	Gene Ontology	GO:0051130	11	1150	2.91117e-05	0.000437914	221477|55243|948|718|3929|91663|28984|4240|6387|720|7018
regulation of defense response	Gene Ontology	GO:0031347	9	756	3.13421e-05	0.000466503	3384|4277|948|718|3106|3929|23586|720|3304
intracellular organelle part	Gene Ontology	GO:0044446	33	7986	3.19557e-05	0.000469618	4301|10537|1203|1787|57190|7018|3304|154810|7078|3105|3106|221477|201176|1659|79188|282809|8224|60559|3482|3135|28984|7846|13|948|3119|3117|31|91663|6134|79026|4857|80024|5799
regulation of signal transduction	Gene Ontology	GO:0009966	17	2663	3.19702e-05	0.000469618	2200|7078|2887|948|718|3480|3929|91663|91851|6387|57190|9855|6285|22881|3304|10537|147746
leukocyte mediated immunity	Gene Ontology	GO:0002443	6	282	3.20496e-05	0.000469618	4277|3119|718|3105|3106|720
vacuole	Gene Ontology	GO:0005773	11	1169	3.37375e-05	0.000491082	3119|3117|3105|3106|3482|1203|3135|30061|7018|79026|7846
negative regulation of cellular process	Gene Ontology	GO:0048523	22	4171	3.38617e-05	0.000491082	102725035|6387|57190|3304|2200|7078|2887|30061|6285|91851|4277|718|3480|55243|3135|28984|11145|948|91663|5420|720|22881
cellular homeostasis	Gene Ontology	GO:0019725	9	780	3.98111e-05	0.000571502	948|7052|1203|30061|6387|57190|7018|5799|80024
regulation of intracellular signal transduction	Gene Ontology	GO:1902531	13	1662	4.15961e-05	0.00059411	7078|147746|948|718|3480|10537|91663|6387|57190|9855|6285|22881|3304
cation homeostasis	Gene Ontology	GO:0055080	8	605	4.29653e-05	0.000610582	948|7052|1203|30061|6387|57190|7018|80024
endosome	Gene Ontology	GO:0005768	9	792	4.47258e-05	0.000632423	3119|3117|3105|3106|3482|3135|30061|7018|7846
cellular component assembly	Gene Ontology	GO:0022607	16	2458	4.51294e-05	0.000634955	55243|948|10537|3480|31|89122|91663|5420|6134|28984|9855|79026|221935|3304|29990|282809
response to organonitrogen compound	Gene Ontology	GO:0010243	9	796	4.64741e-05	0.000650637	2200|7078|2887|10537|3480|1787|6387|57190|221935
chemical homeostasis	Gene Ontology	GO:0048878	10	1000	4.78491e-05	0.000666587	948|7052|31|1203|30061|6387|57190|7018|5799|80024
inorganic ion homeostasis	Gene Ontology	GO:0098771	8	619	5.03317e-05	0.000689577	948|7052|1203|30061|6387|57190|7018|80024
cytokine production	Gene Ontology	GO:0001816	8	619	5.03317e-05	0.000689577	948|718|3106|3929|3135|23586|28984|3304
bounding membrane of organelle	Gene Ontology	GO:0098588	13	1694	5.04747e-05	0.000689577	3482|8224|948|3119|3117|3105|3106|221477|1203|3135|7018|79026|5799
regulation of primary metabolic process	Gene Ontology	GO:0080090	26	5629	5.24103e-05	0.000712579	55243|3929|3304|29990|2200|7078|2887|85329|91851|79026|221477|30061|7757|718|3480|23586|28984|4857|23541|13|948|91663|285676|720|22881|9923
regulation of metabolic process	Gene Ontology	GO:0019222	27	5989	5.42254e-05	0.000732157	55243|3929|3304|29990|2200|7078|2887|85329|30061|79026|221477|91851|7757|718|3480|23586|28984|4857|23541|13|948|31|91663|285676|720|22881|9923
cellular metal ion homeostasis	Gene Ontology	GO:0006875	7	461	5.67682e-05	0.000760855	948|7052|30061|6387|57190|7018|80024
membrane protein complex	Gene Ontology	GO:0098796	10	1028	6.00818e-05	0.000801468	3119|60559|3480|3106|3482|3135|3117|6443|7018|3105
regulation of cellular metabolic process	Gene Ontology	GO:0031323	26	5685	6.20611e-05	0.000823985	55243|3929|3304|29990|2200|7078|2887|91851|79026|221477|30061|7757|718|3480|23586|28984|4857|23541|13|948|31|91663|285676|720|22881|9923
perinuclear region of cytoplasm	Gene Ontology	GO:0048471	8	645	6.68162e-05	0.000882973	11145|55243|6285|3482|1203|55109|7018|3304
ion homeostasis	Gene Ontology	GO:0050801	8	657	7.58165e-05	0.000992635	948|7052|1203|30061|6387|57190|7018|80024
symbiosis, encompassing mutualism through parasitism	Gene Ontology	GO:0044403	10	1062	7.84376e-05	0.00101753	4277|948|3105|3106|3929|6134|23586|6387|4240|3304
interspecies interaction between organisms	Gene Ontology	GO:0044419	10	1062	7.84376e-05	0.00101753	4277|948|3105|3106|3929|6134|23586|6387|4240|3304
regulation of cell migration	Gene Ontology	GO:0030334	8	665	8.23597e-05	0.0010587	3480|3929|91663|28984|5420|23586|6387|154810
adaptive immune response	Gene Ontology	GO:0002250	6	337	8.42322e-05	0.00107787	4277|102725035|3119|718|3105|720
adaptive immune response based on somatic recombination of immune receptors built from immunoglobulin superfamily domains	Gene Ontology	GO:0002460	5	213	9.61292e-05	0.00122456	3105|4277|720|3119|718
negative regulation of cell adhesion	Gene Ontology	GO:0007162	5	220	0.000111475	0.00138878	3135|6387|91663|28984|5420
regulation of innate immune response	Gene Ontology	GO:0045088	6	356	0.000113074	0.00140251	3384|948|3106|3929|23586|3304
membrane region	Gene Ontology	GO:0098589	6	362	0.000123651	0.001527	55243|948|79026|91663|5420|7018
metal ion homeostasis	Gene Ontology	GO:0055065	7	527	0.000128788	0.00158353	948|7052|30061|6387|57190|7018|80024
regulation of cell motility	Gene Ontology	GO:2000145	8	714	0.000133509	0.00162742	3480|3929|91663|28984|5420|23586|6387|154810
positive regulation of transport	Gene Ontology	GO:0051050	9	928	0.00014698	0.00177492	720|948|718|3929|28984|4240|23586|6387|7018
vesicle-mediated transport	Gene Ontology	GO:0016192	11	1382	0.000147492	0.00177492	3482|7078|720|948|718|7052|3929|201176|4240|7018|7127
cellular component biogenesis	Gene Ontology	GO:0044085	16	2724	0.00014963	0.00179303	55243|948|10537|3480|31|89122|91663|5420|6134|28984|9855|79026|221935|3304|29990|282809
cytokine-mediated signaling pathway	Gene Ontology	GO:0019221	7	543	0.000154369	0.00183427	3119|3117|3105|3106|3135|6387|3304
endoplasmic reticulum part	Gene Ontology	GO:0044432	10	1158	0.000157939	0.00186884	13|3119|60559|3105|3106|3135|3117|57190|79188|5799
secretion by cell	Gene Ontology	GO:0032940	9	939	0.000160345	0.00188155	8224|948|7078|28984|6387|7018|7127|5799|80024
innate immune response-activating signal transduction	Gene Ontology	GO:0002758	5	241	0.000168971	0.00197459	23586|3304|3929|3384|948
regulation of locomotion	Gene Ontology	GO:0040012	8	743	0.000174546	0.00203134	3480|3929|91663|28984|5420|23586|6387|154810
regulation of multicellular organismal development	Gene Ontology	GO:2000026	12	1666	0.000181786	0.00210513	4301|102725035|718|6285|3106|55109|91663|6387|3135|22881|28984|221935
organelle membrane	Gene Ontology	GO:0031090	15	2482	0.000182874	0.00210513	3482|8224|3119|948|3117|3105|3106|221477|1203|3135|7018|79026|79188|5799|80024
regulation of molecular function	Gene Ontology	GO:0065009	16	2773	0.000183333	0.00210513	347735|4301|7078|718|3480|221477|201176|23586|28984|57190|9855|720|79026|29990|3304|5799
positive regulation of cell migration	Gene Ontology	GO:0030335	6	390	0.000183864	0.00210513	3480|3929|91663|5420|6387|154810
activation of innate immune response	Gene Ontology	GO:0002218	5	249	0.00019599	0.0022082	23586|3304|3929|3384|948
regulation of developmental process	Gene Ontology	GO:0050793	14	2217	0.000197449	0.00221582	4301|102725035|948|718|6285|3106|55109|91663|28984|3135|22881|6387|221935|85329
endosome membrane	Gene Ontology	GO:0010008	6	397	0.000202039	0.00224947	3119|3117|3105|3106|3135|7018
positive regulation of defense response	Gene Ontology	GO:0031349	6	400	0.000210249	0.0023317	3384|948|718|3929|23586|3304
positive regulation of cell motility	Gene Ontology	GO:2000147	6	402	0.000215867	0.00237158	3480|3929|91663|5420|6387|154810
identical protein binding	Gene Ontology	GO:0042802	10	1210	0.000224098	0.00244691	3480|3482|3135|23586|1659|56267|6285|221935|154810|80024
regulation of cellular component movement	Gene Ontology	GO:0051270	8	773	0.000227418	0.00247361	3480|3929|91663|28984|5420|23586|6387|154810
tissue development	Gene Ontology	GO:0009888	12	1723	0.000246993	0.00263584	4301|7078|7052|6285|91663|5420|30061|28984|57190|6443|22881|9923
positive regulation of locomotion	Gene Ontology	GO:0040017	6	413	0.000248921	0.00264643	3480|3929|91663|5420|6387|154810
positive regulation of cellular component movement	Gene Ontology	GO:0051272	6	414	0.000252113	0.00267032	3480|3929|91663|5420|6387|154810
divalent metal ion transport	Gene Ontology	GO:0070838	6	419	0.000268559	0.00282337	79026|30061|6387|57190|7018|80024
regulation of cell differentiation	Gene Ontology	GO:0045595	11	1484	0.000271102	0.00283954	4301|102725035|948|6285|3106|91663|6387|3135|28984|221935|85329
response to cytokine	Gene Ontology	GO:0034097	8	797	0.000278621	0.00289183	3119|10537|3117|3105|3106|3135|6387|3304
divalent inorganic cation transport	Gene Ontology	GO:0072511	6	422	0.000278825	0.00289183	79026|30061|6387|57190|7018|80024
regulation of vesicle-mediated transport	Gene Ontology	GO:0060627	6	423	0.000282314	0.00290971	7018|948|718|3929|4240|720
organic substance transport	Gene Ontology	GO:0071702	15	2585	0.000282946	0.00290971	23460|347735|2887|948|718|31|3929|91663|28984|6134|23586|6387|7018|5799|80024
lytic vacuole membrane	Gene Ontology	GO:0098852	5	273	0.000297088	0.00303308	3117|79026|3482|1203|3119
lysosomal membrane	Gene Ontology	GO:0005765	5	273	0.000297088	0.00303308	3117|79026|3482|1203|3119
gene expression	Gene Ontology	GO:0010467	23	5182	0.000298583	0.00303738	1203|1787|3304|2200|30061|79026|91851|1659|7757|718|60559|23586|28984|23541|948|55109|91663|6134|285676|720|4857|9923|57604
protein metabolic process	Gene Ontology	GO:0019538	23	5191	0.000306236	0.00309298	147746|55243|10537|3929|4240|3304|7078|7052|221477|718|60559|3480|28984|1203|29990|948|31|89122|91663|6134|720|22881|5799
endosomal part	Gene Ontology	GO:0044440	6	430	0.000307714	0.00309685	3119|3117|3105|3106|3135|7018
membrane raft	Gene Ontology	GO:0045121	5	287	0.000371947	0.00362713	79026|91663|5420|948|55243
membrane microdomain	Gene Ontology	GO:0098857	5	288	0.000377792	0.00367147	79026|91663|5420|948|55243
regulation of macromolecule metabolic process	Gene Ontology	GO:0060255	24	5638	0.000395435	0.00380669	55243|3929|3304|29990|2200|7078|2887|91851|79026|221477|30061|7757|718|3480|23586|28984|4857|23541|948|91663|285676|720|22881|9923
positive regulation of innate immune response	Gene Ontology	GO:0045089	5	291	0.000395745	0.00380669	23586|3304|3929|3384|948
secretion	Gene Ontology	GO:0046903	9	1066	0.000403516	0.00386828	8224|948|7078|28984|6387|7018|7127|5799|80024
early endosome	Gene Ontology	GO:0005769	5	293	0.000408066	0.00389869	3135|3105|3106|3482|7018
negative regulation of signal transduction	Gene Ontology	GO:0009968	9	1086	0.000460897	0.00431595	2200|7078|2887|3480|91663|91851|6387|22881|3304
secretory vesicle	Gene Ontology	GO:0099503	6	465	0.000462858	0.00432001	7078|948|30061|7018|8224|5799
adherens junction	Gene Ontology	GO:0005912	6	466	0.000468047	0.00435407	4301|171024|7052|79026|3482|3304
RNA processing	Gene Ontology	GO:0006396	8	884	0.000549357	0.00507707	79026|55109|6134|1787|1659|4857|3304|57604
positive regulation of cellular metabolic process	Gene Ontology	GO:0031325	15	2759	0.000560712	0.0051459	13|3929|2887|948|718|30061|3480|31|221477|23586|28984|23541|22881|3304|29990
Golgi membrane	Gene Ontology	GO:0000139	7	676	0.000567749	0.0051459	221477|3119|3117|3105|3106|3482|3135
cellular protein metabolic process	Gene Ontology	GO:0044267	21	4725	0.000580828	0.00520587	89122|7078|147746|948|718|7052|3480|1203|221477|91663|6134|55243|60559|28984|4240|720|22881|29990|10537|3304|5799
anchoring junction	Gene Ontology	GO:0070161	6	486	0.000581703	0.00520587	4301|171024|7052|79026|3482|3304
regulation of phosphorylation	Gene Ontology	GO:0042325	10	1371	0.000593146	0.00527489	7078|2887|948|718|3480|91663|55243|28984|22881|29990
regulation of apoptotic process	Gene Ontology	GO:0042981	10	1379	0.00062014	0.00548049	7078|10537|7052|3480|3482|28984|30061|6387|6285|3304
regulation of protein modification process	Gene Ontology	GO:0031399	11	1641	0.000626786	0.00552197	7078|55243|948|718|3480|221477|91663|28984|22881|29990|3304
multicellular organismal homeostasis	Gene Ontology	GO:0048871	5	323	0.000629904	0.0055322	30061|31|7018|948|282809
cellular response to cytokine stimulus	Gene Ontology	GO:0071345	7	689	0.000634374	0.00555421	3119|3117|3105|3106|3135|6387|3304
immune response-regulating cell surface receptor signaling pathway	Gene Ontology	GO:0002768	5	326	0.000656233	0.00565801	3117|3135|3384|4277|3119
regulation of programmed cell death	Gene Ontology	GO:0043067	10	1391	0.000662538	0.00569501	7078|10537|7052|3480|3482|28984|30061|6387|6285|3304
positive regulation of multicellular organismal process	Gene Ontology	GO:0051240	10	1407	0.000722782	0.00610158	55109|948|718|3929|28984|3135|23586|6387|3304|154810
lipid localization	Gene Ontology	GO:0010876	5	335	0.000740186	0.0062299	23460|31|3929|948|718
cell migration	Gene Ontology	GO:0016477	9	1177	0.00081364	0.00673436	4680|3480|3929|91663|28984|5420|23586|6387|154810
Golgi apparatus	Gene Ontology	GO:0005794	10	1431	0.000821601	0.00677402	3482|948|3119|3117|3105|3106|221477|1203|3135|79188
catalytic activity	Gene Ontology	GO:0003824	23	5590	0.000878211	0.0071592	23460|147746|59084|1787|57190|3304|7052|1659|8224|718|60559|3480|3482|23586|7846|13|11145|31|89122|56267|720|5799|57604
negative regulation of cell communication	Gene Ontology	GO:0010648	9	1190	0.000878445	0.0071592	2200|7078|2887|3480|91663|91851|6387|22881|3304
cell leading edge	Gene Ontology	GO:0031252	5	350	0.000897634	0.00728645	6285|154810|91663|5420|23586
negative regulation of signaling	Gene Ontology	GO:0023057	9	1194	0.000899211	0.00728645	2200|7078|2887|3480|91663|91851|6387|22881|3304
regulation of catalytic activity	Gene Ontology	GO:0050790	13	2289	0.000919993	0.00743355	347735|4301|7078|718|3480|221477|201176|28984|9855|720|29990|3304|5799
macromolecule modification	Gene Ontology	GO:0043412	18	3871	0.000936307	0.0075438	89122|7078|147746|948|718|7052|3480|221477|91663|55243|1787|28984|22881|29990|10537|3304|5799|57604
regulation of cellular component biogenesis	Gene Ontology	GO:0044087	7	739	0.00095075	0.00763841	948|55243|91663|5420|28984|9855|3304
apical part of cell	Gene Ontology	GO:0045177	5	360	0.00101564	0.0080908	4301|154810|7018|5420|948
cellular calcium ion homeostasis	Gene Ontology	GO:0006874	5	362	0.00104056	0.00824289	7052|6387|57190|948|80024
regulation of cell death	Gene Ontology	GO:0010941	10	1480	0.00105819	0.00831266	7078|10537|7052|3480|3482|28984|30061|6387|6285|3304
endoplasmic reticulum membrane	Gene Ontology	GO:0005789	8	981	0.00107012	0.00838313	13|3119|60559|3105|3106|3135|3117|57190
cell-cell signaling	Gene Ontology	GO:0007267	10	1485	0.00108519	0.00845433	4301|8224|2887|4680|6285|22881|4857|154810|5799|80024
nucleus	Gene Ontology	GO:0005634	26	6803	0.00110924	0.00861794	4301|147746|10537|1787|3304|154810|7078|85329|6285|221477|201176|1659|79188|7757|3482|4857|28984|23541|7846|55665|171024|31|285676|79026|22881|9923
negative regulation of immune system process	Gene Ontology	GO:0002683	5	370	0.00114482	0.00886997	3135|6387|4277|3106|102725035
positive regulation of metabolic process	Gene Ontology	GO:0009893	15	2962	0.00115492	0.00889946	13|3929|2887|948|718|30061|3480|31|221477|23586|28984|23541|22881|3304|29990
calcium ion homeostasis	Gene Ontology	GO:0055074	5	373	0.00118584	0.00906367	7052|6387|57190|948|80024
regulation of anatomical structure morphogenesis	Gene Ontology	GO:0022603	8	1001	0.00121542	0.00926468	948|718|6285|55109|91663|28984|6387|22881
single-organism metabolic process	Gene Ontology	GO:0044710	18	3962	0.00122195	0.00927307	347735|13|11145|7078|2887|948|718|3480|31|3929|1203|28984|57190|56267|22881|3304|23541|85329
nuclear outer membrane-endoplasmic reticulum membrane network	Gene Ontology	GO:0042175	8	1002	0.00122308	0.00927307	13|3119|60559|3105|3106|3135|3117|57190
membrane organization	Gene Ontology	GO:0061024	8	1004	0.00123851	0.00936498	948|3929|91663|6134|4240|79188|3304|6443
apoptotic process	Gene Ontology	GO:0006915	11	1786	0.00124252	0.00937023	7078|85329|10537|7052|3480|3482|28984|30061|6387|6285|3304
positive regulation of apoptotic process	Gene Ontology	GO:0043065	6	568	0.00128751	0.00967657	7078|10537|7052|6285|3482|28984
positive regulation of programmed cell death	Gene Ontology	GO:0043068	6	573	0.0013455	0.00998587	7078|10537|7052|6285|3482|28984
phosphate-containing compound metabolic process	Gene Ontology	GO:0006796	15	3008	0.00134656	0.00998587	347735|11145|7078|2887|948|718|3480|91663|55243|28984|22881|29990|3304|5799|147746
programmed cell death	Gene Ontology	GO:0012501	11	1808	0.00136937	0.0101112	7078|85329|10537|7052|3480|3482|28984|30061|6387|6285|3304
cellular divalent inorganic cation homeostasis	Gene Ontology	GO:0072503	5	386	0.00137632	0.010136	7052|6387|57190|948|80024
phosphorus metabolic process	Gene Ontology	GO:0006793	15	3016	0.0013825	0.0101551	347735|11145|7078|2887|948|718|3480|91663|55243|28984|22881|29990|3304|5799|147746
focal adhesion	Gene Ontology	GO:0005925	5	388	0.00140751	0.0102854	7052|79026|3304|3482|171024
regulation of response to external stimulus	Gene Ontology	GO:0032101	7	794	0.00143059	0.0104271	4277|948|718|3929|23586|6387|720
immune system development	Gene Ontology	GO:0002520	7	795	0.0014408	0.0104745	102725035|10537|3106|718|3135|30061|9855
cell-substrate adherens junction	Gene Ontology	GO:0005924	5	391	0.00145528	0.0105526	7052|79026|3304|3482|171024
regulation of protein phosphorylation	Gene Ontology	GO:0001932	9	1281	0.00145976	0.0105581	7078|55243|948|718|3480|91663|28984|22881|29990
viral process	Gene Ontology	GO:0016032	8	1032	0.00147141	0.0106151	4277|3105|3106|6134|23586|6387|4240|3304
multi-organism cellular process	Gene Ontology	GO:0044764	8	1036	0.00150735	0.0108463	4277|3105|3106|6134|23586|6387|4240|3304
cell motility	Gene Ontology	GO:0048870	9	1288	0.00151496	0.0108463	4680|3480|3929|91663|28984|5420|23586|6387|154810
localization of cell	Gene Ontology	GO:0051674	9	1288	0.00151496	0.0108463	4680|3480|3929|91663|28984|5420|23586|6387|154810
cell-substrate junction	Gene Ontology	GO:0030055	5	395	0.00152082	0.0108608	7052|79026|3304|3482|171024
macromolecule localization	Gene Ontology	GO:0033036	14	2734	0.00154914	0.0110074	23460|2200|948|718|31|3929|91663|6134|23586|28984|7018|7127|5799|80024
vasculature development	Gene Ontology	GO:0001944	6	593	0.00159768	0.0112956	718|55109|4240|28984|6443|7127
regulation of protein metabolic process	Gene Ontology	GO:0051246	13	2443	0.00165169	0.0116194	3929|7078|55243|948|718|3480|221477|91663|28984|720|22881|29990|3304
divalent inorganic cation homeostasis	Gene Ontology	GO:0072507	5	403	0.00165838	0.0116375	7052|6387|57190|948|80024
regulation of hydrolase activity	Gene Ontology	GO:0051336	9	1316	0.00175285	0.0122095	4301|7078|718|221477|201176|9855|720|3304|5799
cell development	Gene Ontology	GO:0048468	11	1870	0.00178553	0.0123762	4301|6285|91663|6387|1203|5420|28984|57190|6443|221935|9855
positive regulation of cell death	Gene Ontology	GO:0010942	6	607	0.00179459	0.0123858	7078|10537|7052|6285|3482|28984
regulation of phosphate metabolic process	Gene Ontology	GO:0019220	10	1595	0.00183841	0.0125884	7078|2887|948|718|3480|91663|55243|28984|22881|29990
regulation of phosphorus metabolic process	Gene Ontology	GO:0051174	10	1596	0.00184682	0.0126155	7078|2887|948|718|3480|91663|55243|28984|22881|29990
carbohydrate derivative binding	Gene Ontology	GO:0097367	12	2174	0.00186699	0.0127225	23460|3482|8224|147746|3480|31|3929|23586|1659|3304|7846|55665
angiogenesis	Gene Ontology	GO:0001525	5	415	0.00188161	0.0127913	7127|28984|55109|4240|718
lipid binding	Gene Ontology	GO:0008289	6	616	0.00193057	0.0130173	3929|948|718|3482|4240|23541
small molecule binding	Gene Ontology	GO:0036094	13	2487	0.00193326	0.0130173	23460|8224|147746|3480|31|3482|1203|55665|23586|1659|3304|7846|23541
negative regulation of phosphorylation	Gene Ontology	GO:0042326	5	419	0.00196069	0.0131394	3480|91663|7078|2887|55243
macromolecular complex assembly	Gene Ontology	GO:0065003	10	1619	0.0020491	0.0136994	55243|948|3480|31|89122|91663|6134|9855|79026|29990
response to hormone	Gene Ontology	GO:0009725	7	852	0.00212341	0.0141627	2200|2887|718|3480|31|6387|6285
cell death	Gene Ontology	GO:0008219	11	1914	0.00213975	0.0142382	7078|85329|10537|7052|3480|3482|28984|30061|6387|6285|3304
cell proliferation	Gene Ontology	GO:0008283	11	1921	0.00220106	0.0145668	4301|55109|3480|221477|28984|4240|3135|6387|57190|6285|282809
cell activation	Gene Ontology	GO:0001775	7	860	0.00223642	0.0147036	4277|3119|10537|3117|3929|3135|28984
protein complex biogenesis	Gene Ontology	GO:0070271	9	1365	0.0022409	0.0147036	55243|948|3480|31|89122|91663|9855|79026|29990
protein complex assembly	Gene Ontology	GO:0006461	9	1365	0.0022409	0.0147036	55243|948|3480|31|89122|91663|9855|79026|29990
positive regulation of signal transduction	Gene Ontology	GO:0009967	9	1385	0.00246892	0.0158684	7078|2887|948|718|6285|3929|22881|3304|10537
negative regulation of intracellular signal transduction	Gene Ontology	GO:1902532	5	444	0.0025112	0.0160672	3480|6387|91663|7078|3304
Golgi apparatus part	Gene Ontology	GO:0044431	7	886	0.00263616	0.016753	221477|3119|3117|3105|3106|3482|3135
actin cytoskeleton	Gene Ontology	GO:0015629	5	450	0.0026585	0.0168571	23586|31|91663|79026|171024
leukocyte differentiation	Gene Ontology	GO:0002521	5	454	0.00276013	0.0173459	3135|3106|9855|102725035|10537
cytoskeleton	Gene Ontology	GO:0005856	11	1983	0.0028093	0.0176157	171024|79026|31|91663|9855|23586|28984|6443|3304|7846|282809
ion transport	Gene Ontology	GO:0006811	9	1415	0.0028453	0.017802	347735|79026|31|30061|6387|57190|7018|119395|80024
regulation of cellular protein metabolic process	Gene Ontology	GO:0032268	12	2295	0.00291165	0.0181369	7078|55243|948|718|3480|221477|91663|28984|720|22881|29990|3304
cellular response to oxygen-containing compound	Gene Ontology	GO:1901701	7	909	0.00303381	0.0188149	2200|2887|948|3480|31|3929|5799
leukocyte cell-cell adhesion	Gene Ontology	GO:0007159	5	466	0.00308191	0.0190714	3117|3135|6387|4277|3119
cardiovascular system development	Gene Ontology	GO:0072358	7	919	0.0032204	0.0197128	2200|718|55109|4240|28984|6443|7127
circulatory system development	Gene Ontology	GO:0072359	7	919	0.0032204	0.0197128	2200|718|55109|4240|28984|6443|7127
response to organic cyclic compound	Gene Ontology	GO:0014070	7	928	0.00339576	0.0205636	7078|948|718|6285|23586|57190|221935
plasma membrane region	Gene Ontology	GO:0098590	7	932	0.003476	0.0209151	55243|948|30061|5420|23586|7018|154810
macromolecular complex subunit organization	Gene Ontology	GO:0043933	12	2348	0.00349969	0.021013	89122|147746|948|3480|31|221477|91663|6134|55243|9855|79026|29990
multi-organism process	Gene Ontology	GO:0051704	12	2352	0.00354772	0.0212113	3482|4277|948|3105|3106|3929|6134|23586|6387|4240|3304|727830
leukocyte activation	Gene Ontology	GO:0045321	6	700	0.00360772	0.0214792	4277|3119|10537|3117|3929|3135
blood vessel morphogenesis	Gene Ontology	GO:0048514	5	487	0.00370901	0.0219437	7127|28984|55109|4240|718
locomotion	Gene Ontology	GO:0040011	9	1480	0.00381731	0.0224903	4680|3480|3929|91663|28984|5420|23586|6387|154810
cell projection	Gene Ontology	GO:0042995	10	1772	0.00389739	0.0228668	3384|55243|948|6285|91663|5420|23586|154810|5799|282809
cation transport	Gene Ontology	GO:0006812	7	953	0.00392131	0.0229356	79026|119395|30061|6387|57190|7018|80024
hydrolase activity	Gene Ontology	GO:0016787	12	2382	0.00392533	0.0229356	23460|13|11145|718|60559|59084|23586|1659|720|3304|7846|5799
protein modification process	Gene Ontology	GO:0036211	16	3707	0.00396478	0.0230708	89122|7078|147746|948|718|7052|3480|221477|91663|55243|28984|22881|29990|10537|3304|5799
cellular protein modification process	Gene Ontology	GO:0006464	16	3707	0.00396478	0.0230708	89122|7078|147746|948|718|7052|3480|221477|91663|55243|28984|22881|29990|10537|3304|5799
negative regulation of cellular protein metabolic process	Gene Ontology	GO:0032269	7	961	0.00410193	0.0237224	7078|55243|718|3480|91663|720|3304
purine ribonucleoside triphosphate binding	Gene Ontology	GO:0035639	10	1788	0.00414966	0.0239495	23460|8224|147746|3480|31|23586|1659|3304|7846|55665
regulation of cell proliferation	Gene Ontology	GO:0042127	9	1501	0.00418178	0.0240857	4301|3480|55109|28984|4240|3135|6387|57190|6285
nitrogen compound metabolic process	Gene Ontology	GO:0006807	24	6685	0.00426928	0.0244403	1203|1787|3304|2200|347735|30061|79026|91851|1659|7757|60559|3480|23586|28984|23541|11145|948|55109|6134|285676|56267|4857|9923|57604
purine ribonucleoside binding	Gene Ontology	GO:0032550	10	1798	0.00431381	0.0246454	23460|8224|147746|3480|31|23586|1659|3304|7846|55665
ribonucleoside binding	Gene Ontology	GO:0032549	10	1801	0.00436405	0.0247194	23460|8224|147746|3480|31|23586|1659|3304|7846|55665
purine nucleoside binding	Gene Ontology	GO:0001883	10	1801	0.00436405	0.0247194	23460|8224|147746|3480|31|23586|1659|3304|7846|55665
positive regulation of cell communication	Gene Ontology	GO:0010647	9	1513	0.004402	0.0247985	7078|2887|948|718|6285|3929|22881|3304|10537
nucleoside binding	Gene Ontology	GO:0001882	10	1808	0.00448308	0.025155	23460|8224|147746|3480|31|23586|1659|3304|7846|55665
positive regulation of signaling	Gene Ontology	GO:0023056	9	1518	0.0044964	0.0251798	7078|2887|948|718|6285|3929|22881|3304|10537
lysosome	Gene Ontology	GO:0005764	5	515	0.00468137	0.0260096	3117|79026|3482|1203|3119
lytic vacuole	Gene Ontology	GO:0000323	5	515	0.00468137	0.0260096	3117|79026|3482|1203|3119
RNA metabolic process	Gene Ontology	GO:0016070	18	4485	0.00473881	0.0262772	2200|948|91851|30061|79026|55109|285676|6134|1787|23586|28984|1659|23541|4857|3304|9923|7757|57604
purine ribonucleotide binding	Gene Ontology	GO:0032555	10	1830	0.00487402	0.0269213	23460|8224|147746|3480|31|23586|1659|3304|7846|55665
protein phosphorylation	Gene Ontology	GO:0006468	10	1832	0.00491085	0.0270719	7078|147746|948|718|3480|91663|55243|28984|22881|29990
transporter activity	Gene Ontology	GO:0005215	8	1265	0.0050511	0.0275763	23460|347735|119395|3482|30061|7018|23541|80024
hematopoietic or lymphoid organ development	Gene Ontology	GO:0048534	6	753	0.00511493	0.0276712	102725035|10537|3106|3135|30061|9855
purine nucleotide binding	Gene Ontology	GO:0017076	10	1843	0.0051174	0.0276712	23460|8224|147746|3480|31|23586|1659|3304|7846|55665
protein complex binding	Gene Ontology	GO:0032403	6	754	0.00514721	0.0277792	2200|3384|2887|10537|3480|4240
ribonucleotide binding	Gene Ontology	GO:0032553	10	1846	0.00517491	0.0278755	23460|8224|147746|3480|31|23586|1659|3304|7846|55665
lipid metabolic process	Gene Ontology	GO:0006629	8	1275	0.00528941	0.0284381	347735|13|11145|85329|948|718|31|23541
negative regulation of phosphate metabolic process	Gene Ontology	GO:0045936	5	535	0.00547874	0.029289	3480|91663|7078|2887|55243
negative regulation of phosphorus metabolic process	Gene Ontology	GO:0010563	5	535	0.00547874	0.029289	3480|91663|7078|2887|55243
actin cytoskeleton organization	Gene Ontology	GO:0030036	5	536	0.00552097	0.0294591	6387|91663|28984|55243|9855
wound healing	Gene Ontology	GO:0042060	5	537	0.00556344	0.0295741	221477|57190|7078|948|718
negative regulation of protein metabolic process	Gene Ontology	GO:0051248	7	1018	0.00557824	0.0295971	7078|55243|718|3480|91663|720|3304
receptor activity	Gene Ontology	GO:0004872	9	1579	0.00578074	0.0302739	948|102725035|3119|3117|3480|3482|30061|3304|5799
molecular transducer activity	Gene Ontology	GO:0060089	9	1579	0.00578074	0.0302739	948|102725035|3119|3117|3480|3482|30061|3304|5799
phosphorylation	Gene Ontology	GO:0016310	11	2190	0.00589153	0.0307971	7078|2887|948|718|3480|91663|55243|28984|22881|29990|147746
heterocyclic compound binding	Gene Ontology	GO:1901363	21	5701	0.00594748	0.0309181	23460|55109|8224|147746|3480|31|50865|79026|6134|55665|23586|285676|1659|56267|1787|23541|4857|7757|7846|3304|9923
protein complex subunit organization	Gene Ontology	GO:0071822	9	1596	0.00618506	0.0320354	55243|948|3480|31|89122|91663|9855|79026|29990
nucleic acid metabolic process	Gene Ontology	GO:0090304	19	4975	0.00625662	0.0323468	2200|79026|948|91851|30061|3480|55109|285676|6134|1787|23586|28984|1659|23541|4857|3304|9923|7757|57604
regulation of cellular response to stress	Gene Ontology	GO:0080135	5	556	0.00641486	0.0328645	22881|3480|6387|3304|948
metal ion transport	Gene Ontology	GO:0030001	6	796	0.00664319	0.0338503	79026|30061|6387|57190|7018|80024
negative regulation of protein modification process	Gene Ontology	GO:0031400	5	566	0.00689798	0.0347727	3480|3304|7078|91663|55243
organic cyclic compound binding	Gene Ontology	GO:0097159	21	5780	0.00695933	0.0350196	23460|55109|8224|147746|3480|31|50865|79026|6134|55665|23586|285676|1659|56267|1787|23541|4857|7757|7846|3304|9923
blood vessel development	Gene Ontology	GO:0001568	5	573	0.00725098	0.035975	7127|28984|55109|4240|718
positive regulation of cell proliferation	Gene Ontology	GO:0008284	6	829	0.00802364	0.0393256	3480|55109|4240|6387|57190|6285
movement of cell or subcellular component	Gene Ontology	GO:0006928	9	1715	0.00966186	0.0458452	4680|3480|3929|91663|28984|5420|23586|6387|154810
actin filament-based process	Gene Ontology	GO:0030029	5	620	0.00995451	0.0466855	6387|91663|28984|55243|9855
positive regulation of developmental process	Gene Ontology	GO:0051094	7	1147	0.0103592	0.0479315	948|718|55109|91663|28984|3135|6387
positive regulation of intracellular signal transduction	Gene Ontology	GO:1902533	6	882	0.0106576	0.0488488	948|10537|6285|718|22881|3304
cytosol	Gene Ontology	GO:0005829	14	3407	0.0107854	0.0492749	154810|4301|11145|2887|948|7052|79026|31|6134|23586|28984|9855|3304|7846
--------------------

## Sheet: skin
#Term	Database	ID	Input number	Background number	P-Value	Corrected P-Value	Input
intermediate filament	Gene Ontology	GO:0005882	20	194	1.92614e-26	4.32803e-23	9119|3884|3868|3881|319101|3888|386678|100996750|162605|254950|2312|3866|100505724|390792|386676|140258|3848|386685|386682|100505753
intermediate filament cytoskeleton	Gene Ontology	GO:0045111	20	237	8.12387e-25	9.12717e-22	9119|3884|3868|3881|319101|3888|386678|100996750|162605|254950|2312|3866|100505724|390792|386676|140258|3848|386685|386682|100505753
organelle	Gene Ontology	GO:0043226	73	12692	3.53527e-19	2.1874e-16	84629|57118|10659|319101|260293|49860|162605|79091|7148|3866|1203|3888|6653|57190|9855|6483|3881|7280|9073|2938|254950|55316|3105|3106|56647|6283|54084|30061|6202|5783|79188|386676|8842|22897|100505753|9119|3482|144402|30844|5420|60559|10516|50865|100996750|3868|100505724|3929|245972|6443|219970|9415|386685|7846|386682|152485|3884|6401|960|3119|1555|3117|2312|377677|390792|55|9619|5792|316|79026|…
cell part	Gene Ontology	GO:0044464	80	15776	5.38595e-19	2.1874e-16	8501|84629|57118|10659|319101|260293|49860|162605|79091|7148|3866|1203|3888|84830|6653|57190|9855|3881|7280|386685|57724|9073|105372315|2938|254950|55316|3105|3106|56647|6283|54084|30061|2887|6202|5783|79188|386676|8842|22897|100505753|9119|3482|9415|81392|157638|30844|5420|60559|50865|100996750|3868|100505724|3929|245972|6443|219970|90332|6483|5539|7846|386682|152485|3884|6401|960|3119|1555|3117…
cell	Gene Ontology	GO:0005623	80	15802	6.04541e-19	2.1874e-16	8501|84629|57118|10659|319101|260293|49860|162605|79091|7148|3866|1203|3888|84830|6653|57190|9855|3881|7280|386685|57724|9073|105372315|2938|254950|55316|3105|3106|56647|6283|54084|30061|2887|6202|5783|79188|386676|8842|22897|100505753|9119|3482|9415|81392|157638|30844|5420|60559|50865|100996750|3868|100505724|3929|245972|6443|219970|90332|6483|5539|7846|386682|152485|3884|6401|960|3119|1555|3117…
polymeric cytoskeletal fiber	Gene Ontology	GO:0099513	22	663	6.81434e-19	2.1874e-16	7280|319101|162605|3866|3868|100505753|9119|254950|100996750|100505724|386685|7846|386682|3884|3881|2312|3888|390792|386676|140258|3848|386678
supramolecular fiber	Gene Ontology	GO:0099512	22	663	6.81434e-19	2.1874e-16	7280|319101|162605|3866|3868|100505753|9119|254950|100996750|100505724|386685|7846|386682|3884|3881|2312|3888|390792|386676|140258|3848|386678
intracellular	Gene Ontology	GO:0005622	73	13775	5.70531e-17	1.60248e-14	84629|57118|10659|319101|260293|2312|162605|79091|7148|3866|1203|3888|6653|57190|9855|3881|7280|386685|57724|9073|2938|55316|3105|3106|56647|6283|316|30061|2887|6202|5783|79188|386676|8842|22897|100505753|9119|3482|254950|30844|5420|60559|50865|100996750|3868|100505724|245972|6443|219970|90332|6483|5539|7846|386682|152485|3884|6401|960|3119|1555|3117|49860|377677|390792|55|9619|9415|157638|79026|…
intracellular part	Gene Ontology	GO:0044424	72	13428	7.4125e-17	1.85065e-14	84629|57118|10659|319101|260293|2312|162605|79091|3866|1203|3888|6653|57190|9855|3881|7280|386685|57724|9073|2938|55316|3105|3106|56647|6283|316|30061|2887|6202|5783|79188|386676|8842|22897|100505753|9119|3482|254950|30844|5420|60559|50865|100996750|3868|100505724|245972|6443|219970|90332|6483|5539|7846|386682|152485|3884|6401|960|3119|1555|3117|49860|377677|390792|55|9619|9415|157638|79026|14025…
extracellular exosome	Gene Ontology	GO:0070062	34	2738	3.67889e-16	7.38834e-14	7280|319101|6653|162605|144402|3866|1203|3868|7148|10516|2938|3105|3106|6202|5783|8842|9119|3482|3929|30844|50865|316|245972|3881|7846|3884|960|55|49860|5420|5792|79026|3848|80781
extracellular region	Gene Ontology	GO:0005576	42	4424	3.94662e-16	7.38834e-14	7280|319101|6653|162605|144402|3866|1203|3868|7148|3881|10516|89932|2938|3105|3106|6283|54084|6202|5783|8842|22897|9119|3482|3929|30844|50865|316|245972|6483|5539|7846|392399|3884|6401|960|55|49860|5420|5792|79026|3848|80781
extracellular vesicle	Gene Ontology	GO:1903561	34	2751	4.22907e-16	7.38834e-14	7280|319101|6653|162605|144402|3866|1203|3868|7148|10516|2938|3105|3106|6202|5783|8842|9119|3482|3929|30844|50865|316|245972|3881|7846|3884|960|55|49860|5420|5792|79026|3848|80781
extracellular organelle	Gene Ontology	GO:0043230	34	2752	4.27452e-16	7.38834e-14	7280|319101|6653|162605|144402|3866|1203|3868|7148|10516|2938|3105|3106|6202|5783|8842|9119|3482|3929|30844|50865|316|245972|3881|7846|3884|960|55|49860|5420|5792|79026|3848|80781
keratin filament	Gene Ontology	GO:0045095	11	93	1.44289e-15	2.31583e-13	9119|386678|319101|100996750|100505724|3888|386676|3848|386685|386682|100505753
cytoskeleton	Gene Ontology	GO:0005856	29	1983	1.68669e-15	2.52666e-13	7280|319101|162605|3866|3868|9855|79026|6283|5783|22897|100505753|9119|254950|100996750|100505724|6443|386685|7846|386682|3884|6401|3881|2312|3888|390792|386676|140258|3848|386678
membrane-bounded vesicle	Gene Ontology	GO:0031988	37	3520	2.17807e-15	3.05882e-13	7280|319101|6653|162605|144402|3866|1203|3868|7148|10516|2938|3105|3106|30061|6202|5783|8842|9119|3482|3929|30844|50865|316|245972|3881|7846|3884|960|3119|55|49860|5420|3117|5792|79026|3848|80781
extracellular region part	Gene Ontology	GO:0044421	38	3743	2.34703e-15	3.10222e-13	7280|319101|6653|162605|144402|3866|1203|3868|7148|10516|2938|3105|3106|89932|6202|5783|8842|22897|9119|3482|3929|30844|50865|316|245972|3881|5539|7846|3884|6401|960|55|49860|5420|5792|79026|3848|80781
vesicle	Gene Ontology	GO:0031982	37	3652	6.88265e-15	8.59184e-13	7280|319101|6653|162605|144402|3866|1203|3868|7148|10516|2938|3105|3106|30061|6202|5783|8842|9119|3482|3929|30844|50865|316|245972|3881|7846|3884|960|3119|55|49860|5420|3117|5792|79026|3848|80781
intracellular organelle	Gene Ontology	GO:0043229	63	11680	1.20236e-13	1.42195e-11	84629|57118|10659|319101|260293|6653|162605|79091|3866|1203|3888|57190|9855|3881|7280|9073|55316|3105|3106|6283|30061|6202|5783|79188|386676|8842|22897|100505753|9119|3482|56647|30844|5420|60559|254950|100996750|100505724|245972|6443|219970|6483|386685|7846|386682|152485|3884|6401|960|3119|1555|3117|2312|377677|390792|55|9619|9415|3868|79026|140258|3848|386678|80781
structural molecule activity	Gene Ontology	GO:0005198	18	719	1.53535e-13	1.72496e-11	9119|3884|7280|3881|319101|105372315|79026|162605|2312|3866|3888|390792|3868|6202|3848|7846|80781|9073
cytoskeletal part	Gene Ontology	GO:0044430	23	1468	6.30369e-13	6.74495e-11	7280|319101|162605|3866|3868|22897|100505753|9119|254950|100996750|100505724|386685|7846|386682|3884|3881|2312|3888|390792|386676|140258|3848|386678
organelle part	Gene Ontology	GO:0044422	48	8165	9.24906e-11	9.44665e-09	84629|7280|319101|260293|6653|162605|3866|1203|9619|57190|3881|3105|3106|54084|6202|79188|8842|22897|100505753|9119|3482|56647|30844|60559|254950|100996750|100505724|245972|6483|386685|7846|386682|3884|1555|3119|3117|2312|3888|390792|55|386676|9415|3868|79026|140258|3848|386678|80781
binding	Gene Ontology	GO:0005488	64	13918	1.47659e-10	1.44256e-08	84629|57118|10659|319101|260293|2312|3929|7148|3866|1203|9619|6653|57190|9855|3881|7280|9073|2887|55316|3105|3106|6283|89932|30061|10516|6202|5783|79188|8842|22897|3482|56647|30844|5420|90332|100996750|50865|55216|3868|316|245972|197335|51334|1555|5539|7846|392399|57687|152485|3884|6401|960|3119|3117|49860|377677|55|386676|5792|157638|79026|3848|386678|80781
membrane-bounded organelle	Gene Ontology	GO:0043227	58	11806	2.58501e-10	2.42021e-08	84629|57118|10659|319101|260293|2312|162605|79091|3866|1203|9619|6653|57190|7148|3881|7280|9073|2938|55316|3105|3106|56647|6283|30061|6202|5783|79188|8842|22897|9415|9119|3482|144402|30844|5420|60559|10516|50865|3868|316|3929|245972|219970|6483|7846|152485|3884|960|3119|1555|3117|49860|377677|55|5792|79026|3848|80781
intracellular non-membrane-bounded organelle	Gene Ontology	GO:0043232	31	3816	5.91726e-10	5.11388e-08	84629|7280|319101|162605|3866|3868|9855|79026|6283|6202|5783|22897|100505753|9119|254950|100996750|100505724|6443|386685|7846|386682|3884|6401|3881|2312|3888|390792|386676|140258|3848|386678
non-membrane-bounded organelle	Gene Ontology	GO:0043228	31	3816	5.91726e-10	5.11388e-08	84629|7280|319101|162605|3866|3868|9855|79026|6283|6202|5783|22897|100505753|9119|254950|100996750|100505724|6443|386685|7846|386682|3884|6401|3881|2312|3888|390792|386676|140258|3848|386678
intracellular organelle part	Gene Ontology	GO:0044446	46	7986	6.39969e-10	5.32596e-08	84629|7280|319101|260293|6653|162605|3866|1203|9619|57190|3881|3105|3106|6202|79188|22897|100505753|9119|3482|56647|30844|60559|254950|100996750|100505724|245972|6483|386685|7846|386682|3884|1555|3119|55|2312|3888|390792|3117|386676|9415|3868|79026|140258|3848|386678|80781
cytoplasm	Gene Ontology	GO:0005737	52	10469	4.4746e-09	3.59087e-07	84629|57118|10659|9073|260293|49860|162605|79091|316|1203|9619|6653|57190|9855|7280|57724|2938|55316|3105|3106|6283|30061|6202|5783|79188|8842|22897|3482|30844|5420|60559|50865|245972|6443|219970|90332|6483|5539|7846|2887|6401|960|3119|1555|3117|2312|377677|55|9415|157638|79026|80781
single-organism process	Gene Ontology	GO:0044699	58	12728	6.04023e-09	4.68014e-07	8501|84629|57118|57687|319101|260293|2312|3929|7148|3866|1203|9619|6653|57190|9855|7280|57724|2887|55316|3105|3106|6283|30061|6202|5783|79188|8842|22897|5792|9119|3482|81392|2938|5420|90332|10516|56647|100996750|316|245972|6443|51334|6483|5539|7846|3884|6401|960|3119|1555|55|49860|377677|3117|9415|3868|3848|80781
endomembrane system	Gene Ontology	GO:0012505	28	3788	4.06341e-08	3.0435e-06	84629|9073|260293|79091|1203|9619|57190|3105|3106|30061|79188|8842|30844|60559|3482|245972|219970|6483|7846|6401|960|3119|1555|3117|6653|55|9415|80781
endoplasmic reticulum	Gene Ontology	GO:0005783	18	1623	5.74017e-08	4.1607e-06	1555|3117|3119|60559|3105|3106|6653|1203|9619|30844|260293|57190|9415|219970|79188|8842|80781|9073
protein binding	Gene Ontology	GO:0005515	49	10621	2.39606e-07	1.58352e-05	57118|57687|319101|6653|3929|7148|3866|1203|9619|57190|9855|7280|9073|2887|3105|3106|6283|30061|10516|5783|79188|8842|22897|3482|30844|90332|100996750|56647|55216|3868|245972|197335|3848|3881|5539|7846|3884|6401|960|55|2312|5420|386676|5792|157638|79026|51334|386678|80781
cell periphery	Gene Ontology	GO:0071944	31	4962	2.72549e-07	1.74977e-05	8501|9073|79091|9619|84830|2887|3105|3106|6283|30061|5783|8842|9415|81392|30844|105372315|3482|245972|6443|90332|6401|960|3119|3117|6653|5420|55|5792|157638|79026|3848
endosome	Gene Ontology	GO:0005768	12	792	4.95357e-07	3.03334e-05	30844|3119|30061|3117|3105|3106|3482|6653|9619|55|7846|245972
membrane	Gene Ontology	GO:0016020	43	8805	5.12982e-07	3.03334e-05	8501|84629|9073|260293|6653|79091|1203|9619|84830|57190|9855|105372315|2887|3105|3106|6283|30061|6202|5783|79188|8842|5792|3929|81392|30844|60559|3482|55334|245972|6443|6483|6401|960|3119|1555|3117|49860|5420|55|9415|157638|79026|3848
cellular process	Gene Ontology	GO:0009987	59	14647	5.31853e-07	3.06429e-05	84629|57118|10659|319101|55617|3929|7148|3866|1203|9619|6653|57190|9855|7280|57724|105372315|2938|55316|3105|3106|6283|89932|30061|2887|6202|5783|79188|8842|22897|9415|9119|3482|81392|30844|5420|60559|10516|56647|3868|316|245972|6443|90332|6483|5539|7846|152485|6401|960|3119|1555|3117|2312|377677|55|5792|79026|51334|80781
plasma membrane	Gene Ontology	GO:0005886	30	4859	5.92498e-07	3.32836e-05	8501|9073|79091|9619|84830|2887|3105|3106|6283|30061|5783|8842|9415|81392|30844|105372315|3482|245972|6443|6401|960|3119|3117|6653|5420|55|5792|157638|79026|3848
cytoplasmic part	Gene Ontology	GO:0044444	40	7901	6.67014e-07	3.59115e-05	84629|9073|260293|6653|79091|316|1203|9619|57190|9855|2938|55316|3105|3106|6283|30061|6202|79188|8842|22897|30844|60559|3482|245972|219970|90332|6483|7846|2887|6401|960|3119|1555|3117|2312|377677|55|9415|79026|80781
extracellular space	Gene Ontology	GO:0005615	15	1330	6.82271e-07	3.59115e-05	3884|3482|6401|3881|55|3929|6653|5420|22897|7148|3848|5539|80781|10516|8842
vacuole	Gene Ontology	GO:0005773	14	1169	8.33038e-07	4.15964e-05	30844|3119|30061|3117|3105|3106|3482|6653|1203|9619|55|79026|7846|245972
single-organism cellular process	Gene Ontology	GO:0044763	50	11494	1.09236e-06	5.33595e-05	84629|57118|319101|6653|3929|7148|3866|1203|9619|57190|9855|7280|57724|2887|3105|3106|6283|30061|6202|5783|79188|8842|22897|9415|9119|3482|81392|2938|5420|90332|10516|56647|3868|316|245972|6443|6483|5539|7846|6401|960|3119|1555|55|2312|377677|3117|5792|51334|80781
vacuolar membrane	Gene Ontology	GO:0005774	10	586	1.67817e-06	7.69562e-05	30844|3119|245972|3117|3105|3106|3482|1203|55|79026
interferon-gamma-mediated signaling pathway	Gene Ontology	GO:0060333	5	85	2.59039e-06	0.000116412	3117|3105|3106|960|3119
structural constituent of cytoskeleton	Gene Ontology	GO:0005200	5	100	5.53324e-06	0.000230244	3868|7846|7280|3881|3866
vacuolar part	Gene Ontology	GO:0044437	10	690	6.92343e-06	0.000282854	30844|3119|245972|3117|3105|3106|3482|1203|55|79026
plasma membrane part	Gene Ontology	GO:0044459	19	2516	7.29355e-06	0.000292653	8501|6401|960|9073|3119|245972|3117|3105|3106|3482|6653|5420|9619|30061|5792|79026|8842|6443|9415
response to stress	Gene Ontology	GO:0006950	23	3660	1.36685e-05	0.000520561	57118|319101|3929|3866|57190|10516|3105|3106|6283|22897|56647|3868|316|7148|5539|6401|960|3119|3117|49860|5792|3848|80781
intracellular membrane-bounded organelle	Gene Ontology	GO:0043231	45	10674	1.54902e-05	0.000570598	84629|57118|10659|319101|260293|6653|79091|3866|1203|9619|57190|7280|9073|55316|3105|3106|6283|30061|6202|5783|79188|8842|22897|3482|30844|5420|60559|56647|3868|245972|219970|6483|7846|152485|960|3119|1555|3117|2312|377677|55|9415|79026|3848|80781
integral component of plasma membrane	Gene Ontology	GO:0005887	14	1562	2.20251e-05	0.000785561	8501|960|3117|3105|3106|3482|6653|5420|9619|30061|5792|8842|6443|9415
endoplasmic reticulum part	Gene Ontology	GO:0044432	12	1158	2.25104e-05	0.000790325	1555|3117|3119|60559|3105|3106|9619|260293|57190|9415|79188|80781
membrane part	Gene Ontology	GO:0044425	32	6452	2.43513e-05	0.000841806	8501|9073|260293|1203|9619|84830|57190|9855|105372315|3105|3106|30061|79188|8842|9415|81392|60559|3482|55334|245972|6443|6483|6401|960|3119|1555|3117|6653|5420|55|5792|79026
cellular response to interferon-gamma	Gene Ontology	GO:0071346	5	138	2.47754e-05	0.000843489	3117|3105|3106|960|3119
peptide binding	Gene Ontology	GO:0042277	6	240	2.85764e-05	0.000958376	3119|3117|3105|3106|6653|30061
intrinsic component of plasma membrane	Gene Ontology	GO:0031226	14	1619	3.2495e-05	0.00105821	8501|960|3117|3105|3106|3482|6653|5420|9619|30061|5792|8842|6443|9415
Golgi apparatus	Gene Ontology	GO:0005794	13	1431	3.88105e-05	0.00123151	3482|960|3119|3117|3105|3106|79091|6653|1203|9619|55|79188|6483
endocytic vesicle	Gene Ontology	GO:0030139	6	254	3.89127e-05	0.00123151	3119|3117|3105|3106|3482|245972
endocytic vesicle membrane	Gene Ontology	GO:0030666	5	153	3.99353e-05	0.00124631	3117|3105|3106|3119|245972
amide binding	Gene Ontology	GO:0033218	6	260	4.4172e-05	0.00135965	3119|3117|3105|3106|6653|30061
response to interferon-gamma	Gene Ontology	GO:0034341	5	160	4.90889e-05	0.0014707	3117|3105|3106|960|3119
lytic vacuole membrane	Gene Ontology	GO:0098852	6	273	5.75281e-05	0.00165725	3119|3117|79026|3482|1203|55
lysosomal membrane	Gene Ontology	GO:0005765	6	273	5.75281e-05	0.00165725	3119|3117|79026|3482|1203|55
integral component of membrane	Gene Ontology	GO:0016021	27	5233	6.92282e-05	0.00196906	8501|9073|260293|1203|9619|84830|105372315|3105|3106|30061|79188|8842|9415|81392|60559|3482|55334|6443|6483|6401|960|3119|3117|6653|5420|55|5792
defense response	Gene Ontology	GO:0006952	13	1535	7.85834e-05	0.00217672	6401|960|3119|3117|3105|3106|3929|3868|316|6283|57118|3848|5539
localization	Gene Ontology	GO:0051179	28	5581	7.94353e-05	0.00217672	8501|57118|6653|3929|9619|57190|10516|2887|79026|6283|30061|6202|30844|5420|90332|3482|3868|55334|245972|5539|7846|392399|6401|960|57724|377677|5792|80781
early endosome	Gene Ontology	GO:0005769	6	293	8.4201e-05	0.00227951	30844|3105|3106|3482|6653|245972
Golgi subcompartment	Gene Ontology	GO:0098791	6	294	8.57559e-05	0.00229397	3119|3117|3482|6653|55|6483
whole membrane	Gene Ontology	GO:0098805	12	1344	9.27547e-05	0.002452	6401|30844|3119|245972|3117|3105|3106|3482|5420|1203|55|79026
intrinsic component of membrane	Gene Ontology	GO:0031224	27	5355	0.000102735	0.00268425	8501|9073|260293|1203|9619|84830|105372315|3105|3106|30061|79188|8842|9415|81392|60559|3482|55334|6443|6483|6401|960|3119|3117|6653|5420|55|5792
organelle subcompartment	Gene Ontology	GO:0031984	6	309	0.000111955	0.00289151	3119|3117|3482|6653|55|6483
endoplasmic reticulum membrane	Gene Ontology	GO:0005789	10	981	0.000129463	0.00330573	1555|3117|3119|60559|3105|3106|9619|260293|57190|9415
innate immune response	Gene Ontology	GO:0045087	9	798	0.000136257	0.00344011	3868|960|3119|3117|3105|3106|3929|6283|3848
single-organism metabolic process	Gene Ontology	GO:0044710	22	3962	0.000139251	0.00347663	57118|57687|260293|3929|316|1203|9619|57190|7148|6483|2887|6283|55316|2938|1555|6401|960|55|6653|377677|9415|80781
response to stimulus	Gene Ontology	GO:0050896	35	8081	0.000151496	0.00368875	57118|319101|6653|3929|7148|3866|9619|57190|9855|10516|2887|3105|3106|6283|30061|5783|22897|3482|81392|30844|56647|3868|316|245972|1555|5539|6401|960|3119|55|49860|3117|5792|3848|80781
nuclear outer membrane-endoplasmic reticulum membrane network	Gene Ontology	GO:0042175	10	1002	0.000153412	0.00368875	1555|3117|3119|60559|3105|3106|9619|260293|57190|9415
cell adhesion	Gene Ontology	GO:0007155	12	1421	0.000155289	0.00368875	6401|960|9073|3119|3117|49860|5420|5792|7148|80781|10516|9855
biological adhesion	Gene Ontology	GO:0022610	12	1428	0.000162445	0.00380223	6401|960|9073|3119|3117|49860|5420|5792|7148|80781|10516|9855
transport vesicle	Gene Ontology	GO:0030133	6	339	0.00018328	0.00424568	3119|3117|3105|3106|3482|30061
cellular component organization	Gene Ontology	GO:0016043	28	5863	0.000186928	0.004286	84629|57118|319101|6653|3929|3866|1203|9619|57190|9855|10516|79026|6202|79188|22897|30844|3868|245972|6443|7148|5539|6401|960|57724|5420|5792|51334|80781
immune system process	Gene Ontology	GO:0002376	16	2414	0.000193715	0.00439675	9119|6401|960|3119|3117|3105|3106|3929|3868|5420|6283|30061|57118|9855|3848|5539
bounding membrane of organelle	Gene Ontology	GO:0098588	13	1694	0.00020651	0.00459434	30844|3119|245972|3117|3105|3106|3482|1203|9619|55|79026|6483|8842
leukocyte migration	Gene Ontology	GO:0050900	6	356	0.000237304	0.00522768	57118|960|3929|5420|6283|6401
tissue development	Gene Ontology	GO:0009888	13	1723	0.000243134	0.00530409	3868|960|2938|56647|2312|3866|5420|30061|57190|6443|3881|8842|80781
regulation of response to stimulus	Gene Ontology	GO:0048583	20	3560	0.000256697	0.0054415	57118|6401|960|2887|3119|3117|3105|3106|3929|6653|7148|6283|55|57190|5792|5783|3848|5539|10516|9855
coated vesicle	Gene Ontology	GO:0030135	5	232	0.000267254	0.00561233	3117|3105|3106|3482|3119
transport	Gene Ontology	GO:0006810	23	4456	0.00027846	0.00579351	8501|57118|6653|3929|9619|57190|10516|2887|79026|6283|30061|6202|30844|90332|3482|55334|245972|5539|7846|392399|6401|57724|377677
developmental process	Gene Ontology	GO:0032502	27	5693	0.000284814	0.00583752	57118|2312|3929|3866|1203|9619|57190|9855|3106|30061|3868|8842|22897|9119|3482|2938|56647|100996750|6443|3881|3884|960|6653|5420|5792|3848|80781
cellular component organization or biogenesis	Gene Ontology	GO:0071840	28	6012	0.000285771	0.00583752	84629|57118|319101|6653|3929|3866|1203|9619|57190|9855|10516|79026|6202|79188|22897|30844|3868|245972|6443|7148|5539|6401|960|57724|5420|5792|51334|80781
Golgi apparatus part	Gene Ontology	GO:0044431	9	886	0.000292772	0.00587374	3119|3117|3105|3106|3482|6653|9619|55|6483
regulation of response to stress	Gene Ontology	GO:0080134	11	1337	0.000369695	0.00716125	6401|960|3106|3929|7148|6283|57190|5792|3848|5539|10516
epithelial cell differentiation	Gene Ontology	GO:0030855	7	548	0.000375679	0.00721496	3868|2938|56647|2312|5420|8842|80781
cell surface	Gene Ontology	GO:0009986	8	726	0.000378943	0.00721598	3482|960|3105|3106|3929|9619|54084|8842
establishment of localization	Gene Ontology	GO:0051234	23	4583	0.000416883	0.00779306	8501|57118|6653|3929|9619|57190|10516|2887|79026|6283|30061|6202|30844|90332|3482|55334|245972|5539|7846|392399|6401|57724|377677
endosome membrane	Gene Ontology	GO:0010008	6	397	0.000419653	0.00779306	3119|30844|3117|3105|3106|245972
cell migration	Gene Ontology	GO:0016477	10	1177	0.0005412	0.00957541	57118|960|3929|6653|5420|6283|6401|5792|3868|80781
endosomal part	Gene Ontology	GO:0044440	6	430	0.000633869	0.0110411	3119|30844|3117|3105|3106|245972
cellular response to stimulus	Gene Ontology	GO:0051716	29	6741	0.000813601	0.0135834	57118|319101|3929|7148|3866|57190|9855|10516|2887|3105|3106|6283|30061|5783|22897|3482|81392|30844|56647|245972|1555|5539|6401|960|3119|55|6653|3117|5792
organelle membrane	Gene Ontology	GO:0031090	15	2482	0.00081609	0.0135834	84629|30844|3119|245972|3117|3105|3106|3482|1203|9619|55|79026|79188|6483|8842
metabolic process	Gene Ontology	GO:0008152	40	10642	0.000883893	0.0144971	84629|57118|10659|260293|55617|79091|316|1203|9619|57190|7148|57687|10516|2938|55316|79026|6283|89932|30061|2887|6202|5783|22897|9415|3929|30844|60559|56647|3848|6483|152485|6401|960|55|6653|377677|1555|5792|51334|80781
multicellular organismal process	Gene Ontology	GO:0032501	29	6781	0.00089602	0.0145895	57118|10659|2312|3929|1203|9619|57190|9855|3106|6283|54084|30061|3868|8842|9119|81392|3482|100996750|6443|7148|5539|3884|960|55|6653|5420|5792|3848|80781
inflammatory response	Gene Ontology	GO:0006954	7	644	0.000959932	0.0152976	6401|3929|3868|316|6283|57118|3848
cell motility	Gene Ontology	GO:0048870	10	1288	0.00106934	0.0162352	57118|960|3929|6653|5420|6283|6401|5792|3868|80781
localization of cell	Gene Ontology	GO:0051674	10	1288	0.00106934	0.0162352	57118|960|3929|6653|5420|6283|6401|5792|3868|80781
multicellular organismal homeostasis	Gene Ontology	GO:0048871	5	323	0.00115874	0.016907	3848|8842|3868|2312|30061
response to chemical	Gene Ontology	GO:0042221	20	4014	0.00117491	0.0170323	57118|3482|6401|960|30844|3119|245972|3117|3105|3106|3929|81392|6283|30061|57190|9619|1555|80781|10516|2887
cell-cell adhesion	Gene Ontology	GO:0098609	8	872	0.00122759	0.0175693	6401|960|9073|3119|3117|49860|5420|7148
cellular response to chemical stimulus	Gene Ontology	GO:0070887	15	2587	0.00123583	0.0175754	57118|960|30844|3119|245972|3117|3105|3106|3929|6283|30061|57190|1555|10516|2887
single-organism developmental process	Gene Ontology	GO:0044767	25	5604	0.00126247	0.0176567	57118|2312|3929|1203|9619|57190|9855|3106|30061|3868|8842|22897|9119|3482|2938|56647|100996750|6443|3884|960|6653|5420|5792|3848|80781
Golgi membrane	Gene Ontology	GO:0000139	7	676	0.00126512	0.0176567	3119|3117|3105|3106|3482|9619|6483
vesicle membrane	Gene Ontology	GO:0012506	6	497	0.00132226	0.0181166	3119|55|3117|3105|3106|245972
anatomical structure development	Gene Ontology	GO:0048856	24	5313	0.00136725	0.0186195	57118|2312|3929|3866|1203|57190|9855|3106|30061|8842|22897|9119|56647|2938|3482|3868|6443|3881|960|6653|5420|5792|3848|80781
single organismal cell-cell adhesion	Gene Ontology	GO:0016337	7	696	0.00149146	0.0198671	6401|960|3119|3117|49860|5420|7148
lysosome	Gene Ontology	GO:0005764	6	515	0.00157972	0.0205181	3119|3117|79026|3482|1203|55
lytic vacuole	Gene Ontology	GO:0000323	6	515	0.00157972	0.0205181	3119|3117|79026|3482|1203|55
oxidoreductase activity	Gene Ontology	GO:0016491	7	710	0.00166787	0.0214155	1555|260293|316|55316|57190|9415|57687
oxidation-reduction process	Gene Ontology	GO:0055114	8	947	0.00204842	0.0250153	1555|2887|260293|316|55316|57190|9415|57687
biological regulation	Gene Ontology	GO:0065007	40	11110	0.00213263	0.0256159	84629|57118|10659|6653|3929|1203|9619|57190|9855|10516|2887|3105|3106|6283|89932|30061|55617|8842|3482|56647|81392|30844|5783|3868|245972|3848|7148|5539|152485|6401|960|3119|55|2312|5420|3117|5792|79026|51334|80781
single-multicellular organism process	Gene Ontology	GO:0044707	25	5822	0.00215925	0.0256159	57118|2312|3929|1203|9619|57190|9855|3106|6283|30061|3868|8842|9119|3482|100996750|6443|7148|5539|3884|960|6653|5420|5792|3848|80781
macroautophagy	Gene Ontology	GO:0016236	5	374	0.00217983	0.0256159	245972|5539|57724|3866|319101
single organism cell adhesion	Gene Ontology	GO:0098602	7	745	0.00218043	0.0256159	6401|960|3119|3117|49860|5420|7148
animal organ development	Gene Ontology	GO:0048513	16	3087	0.00264501	0.0303232	9119|3482|960|3106|3929|2312|5420|1203|30061|57190|9855|3868|3848|8842|80781|6443
catalytic activity	Gene Ontology	GO:0003824	24	5590	0.00271803	0.0308455	57118|57687|260293|55617|79091|316|9619|57190|7280|89932|55316|5783|9415|2938|60559|3482|219970|6483|7846|960|55|377677|1555|5792
regulation of biological process	Gene Ontology	GO:0050789	38	10509	0.00275639	0.0311237	84629|57118|10659|55617|3929|9619|57190|9855|10516|2887|3105|3106|6283|89932|30061|5783|8842|3482|81392|30844|56647|3868|245972|3848|7148|5539|152485|6401|960|3119|55|6653|5420|3117|5792|79026|51334|80781
chemical homeostasis	Gene Ontology	GO:0048878	8	1000	0.00285329	0.0317393	3868|30061|2312|1203|9619|245972|57190|3848
locomotion	Gene Ontology	GO:0040011	10	1480	0.00293656	0.032242	57118|960|3929|6653|5420|6283|6401|5792|3868|80781
regulation of response to external stimulus	Gene Ontology	GO:0032101	7	794	0.00309367	0.0335821	6401|3929|6283|57118|5792|3848|5539
endocytosis	Gene Ontology	GO:0006897	6	595	0.00321193	0.0346981	3482|57118|30844|3929|6653|6401
side of membrane	Gene Ontology	GO:0098552	5	412	0.00328344	0.0353009	3117|3105|3106|3119|9619
membrane protein complex	Gene Ontology	GO:0098796	8	1028	0.00336838	0.0360417	3119|245972|60559|3105|3106|3482|3117|6443
epithelium development	Gene Ontology	GO:0060429	8	1042	0.00365171	0.0376218	3868|2938|56647|2312|5420|30061|8842|80781
regulation of vesicle-mediated transport	Gene Ontology	GO:0060627	5	423	0.00366674	0.0376218	3929|6653|6401|57118|30844
extracellular matrix	Gene Ontology	GO:0031012	5	423	0.00366674	0.0376218	89932|3848|80781|10516|7148
positive regulation of biological process	Gene Ontology	GO:0048518	22	5067	0.00371007	0.0377219	57118|55617|3929|9619|57190|2887|3105|6283|30061|8842|30844|3482|51334|6401|960|3119|55|6653|5420|3117|3848|80781
cell differentiation	Gene Ontology	GO:0030154	17	3519	0.00397379	0.0395094	9119|57118|2938|6653|3106|56647|2312|5420|1203|9619|57190|5792|3868|8842|80781|6443|9855
cellular developmental process	Gene Ontology	GO:0048869	18	3837	0.00410342	0.0405766	9119|57118|2938|6653|3106|56647|2312|5420|1203|9619|57190|5792|3868|8842|80781|22897|6443|9855
regulation of cellular process	Gene Ontology	GO:0050794	36	9997	0.00411725	0.0405766	84629|57118|55617|3929|9619|57190|9855|10516|2887|3105|3106|6283|89932|30061|5783|8842|3482|81392|30844|56647|3868|245972|7148|5539|152485|6401|960|3119|55|6653|5420|3117|5792|79026|51334|80781
single-organism transport	Gene Ontology	GO:0044765	14	2654	0.00426836	0.0417997	8501|57118|2887|90332|3929|6653|6283|245972|6401|57190|6202|5539|9619|10516
receptor activity	Gene Ontology	GO:0004872	10	1579	0.00461722	0.0439614	6401|960|3119|3117|3482|6653|81392|30061|5792|3848
molecular transducer activity	Gene Ontology	GO:0060089	10	1579	0.00461722	0.0439614	6401|960|3119|3117|3482|6653|81392|30061|5792|3848
system development	Gene Ontology	GO:0048731	19	4206	0.00476219	0.0449607	9119|3482|57118|960|6653|3106|3929|2312|5420|1203|30061|57190|9855|3868|3848|8842|80781|6443|5792
--------------------
